# Supplementary material for: Female Drosophila melanogaster Gene Expression and Mate Choice: The X Chromosome Harbours Candidate Genes Underlying Sexual Isolation
Source: PubMed Central journal article supplement (PMC3046225; doi:10.1371/journal.pone.0017358), 2011-02-28
Supplement: pone.0017358.s002.pdf [file pone.0017358.s002.pdf]

| Probe      | Symbol     | Chromosome | Gene    | Cytoband   | UniGene  | logFC     |
|------------|------------|------------|---------|------------|----------|-----------|
| 1634092_at | CG3654     | 3L         | 39103   | 67B9-67B1C | Dm.29618 | -0,361068 |
| 1625270_at | CG31259    | 3R         | 41010   | 85A2-85A2  | Dm.6169  | -0,415024 |
| 1635854_s. | CG40351    | 3L         | 3354971 |            | Dm.5195  | -0,331018 |
| 1625445_s. | shn        | 2R         | 36171   | 47D6-47D7  | Dm.4730  | -0,366795 |
| 1629184_at | CG3819     | 3L         | 40069   | 75E6-75E6  | Dm.13243 | -0,372508 |
| 1626257_at | CG13656    | 3R         | 43047   | 96C8-96C8  | Dm.16495 | 0,303284  |
| 1624378_at | east       | X          | 46006   | 2C2-2C4    | Dm.6506  | -0,322882 |
| 1633465_at | Cp7Fa      | X          | 3885650 | 7F1-7F1    | Dm.23618 | -0,966286 |
| 1631343_at | CG15571    | X          | 31365   | 4B3-4B3    | Dm.28015 | -0,793428 |
| 1630441_at | CG12716    | X          | 32248   | 11D5-11D5  | Dm.25386 | -0,743974 |
| 1636174_at | GstD9      | 3R         | 41502   | 87B8-87B8  | Dm.21658 | -0,763961 |
| 1634154_at | CG15570    | X          | 31366   | 4B3-4B3    | Dm.26454 | -0,583006 |
| 1629407_at | CG13113    | 2L         | 34271   | 30B10-30B1 | Dm.26770 | -0,579673 |
| 1632992_at | CG11381    | X          | 31067   | 1E4-1E4    | Dm.5813  | -0,560702 |
| 1627551_s. | AttA       | 2R         | 36636   | 51C1-51C1  | Dm.3981  | -0,514829 |
| 1632975_at | CG4398     | 2R         | 36838   | 53C4-53C4  | Dm.16005 | -0,510924 |
| 1637707_at | CG4009     | 3R         | 42054   | 89E10-89E1 | Dm.27320 | -0,446913 |
| 1624882_at | CG4066     | 3R         | 41493   | 87B6-87B6  | Dm.27269 | -0,461653 |
| 1626086_at | CG10621    | 2L         | 35152   | 37B7-37B7  | Dm.10781 | 0,420911  |
| 1631394_at | CG31324    | 3R         | 43177   | 96F14-97A1 | Dm.20262 | -0,47411  |
| 1636343_at | CG6283     | 3R         | 43250   | 97D14-97D1 | Dm.5888  | -0,385738 |
| 1631481_a. | Kr-h1      | 2L         | 33861   | 26B5-26B5  | Dm.3266  | -0,441636 |
| 1637144_a. | Map205     | 3R         | 43765   | 100E3-100E | Dm.1892  | -0,400976 |
| 1630550_a. | CG5674     | 2L         | 35072   | 36E3-36E3  | Dm.12153 | -0,403664 |
| 1629229_a. | srp        | 3R         | 41944   | 89A11-89A1 | Dm.1934  | -0,425425 |
| 1637182_at | CG9503     | X          | 32424   | 13A1-13A1  | Dm.11854 | -0,381957 |
| 1634762_a. | CG15096    | 2R         | 37170   | 55F5-55F5  | Dm.3842  | -0,421049 |
| 1633208_at | CG11741    | 3R         | 5740784 |            | Dm.33388 | -0,448344 |
| 1638176_at | Magi       | 2R         | 37403   | 57C2-57C3  | Dm.714   | -0,320632 |
| 1637835_at | CG12177    | X          | 32326   | 12B2-12B2  | Dm.17450 | -0,381129 |
| 1639320_a. | Ddc        | 2L         | 35190   | 37C1-37C1  | Dm.12979 | -0,383241 |
| 1631779_s. | ptr        | X          | 44529   | 3A1-3A1    | Dm.1828  | -0,402564 |
| 1639550_a. | CG9650     | X          | 31660   | 7A2-7A5    | Dm.20992 | -0,387743 |
| 1641048_a. | toc        | 2L         | 33526   | 23D1-23D2  | Dm.7877  | -0,364812 |
| 1637971_a. | CG8129     | 3R         | 41117   | 85D12-85D1 | Dm.20161 | 0,348784  |
| 1624800_at | CG5224     | 2R         | 37128   | 55D1-55D1  | Dm.11215 | -0,423798 |
| 1627122_at | CG32767    | X          | 31430   | 4E2-4E2    | Dm.6248  | -0,378664 |
| 1623931_s. | CanA-14F   | X          | 32625   | 14E3-14F1  | Dm.33830 | -0,348804 |
| 1634287_at | CG13737    | 3L         | 39531   | 70C5-70C5  | Dm.14888 | -0,315505 |
| 1624979_at | CG18594    | 3R         | 42644   | 94A16-94A1 | Dm.20618 | -0,356697 |
| 1625113_s. | CG6509     | 2L         | 34573   | 32F2-32F2  | Dm.2056  | -0,320079 |
| 1623770_at | CG1673     | X          | 32297   | 11F1-11F3  | Dm.10853 | -0,339326 |
| 1635742_s. | Cad74A     | 3L         | 39936   | 74A5-74A6  | Dm.14940 | -0,313552 |
| 1633682_a. | l(1)G0232  | X          | 31907   | 8F2-8F6    | Dm.20620 | -0,345057 |
| 1627284_at | PH4alphaPV | 3R         | 43640   | 100A1-100A | Dm.12823 | -0,32277  |
| 1639151_a. | CG4272     | 2L         | 33419   | 22E1-22E1  | Dm.3019  | -0,317096 |
| 1634670_at | CG33181    | X          | 318916  | 7F1-7F1    | Dm.20779 | -0,296807 |
| 1631105_at | Tsp96F     | 3R         | 43127   | 96F5-96F5  | Dm.1337  | -0,363346 |
| 1624717_s. | CG32647    | X          | 326226  | 11C1-11C2  | Dm.13947 | 0,32431   |
| 1632656_at | CG12112    | X          | 31794   | 7F4-7F4    | Dm.2199  | -0,304831 |
| 1629658_at | CG33298    | 2L         | 2768929 | 30B5-30B1C | Dm.7689  | -0,299779 |
| 1631037_at | BthD       | X          | 32317   | 12A8-12A8  | Dm.31055 | -0,286704 |

|                        |    |                   |          |           |
|------------------------|----|-------------------|----------|-----------|
| 1640289_a. CG40439     | 2L | 3355120           | Dm.28057 | -0,302982 |
| 1631687_a  RN-tre      | 2R | 36554 50C23-50C2  | Dm.614   | -0,288308 |
| 1632317_a  CG3036      | 2L | 33695 25B1-25B2   | Dm.33536 | -0,325446 |
| 1625794_a  CG5830      | 3L | 39748 72C1-72C2   | Dm.15257 | -0,360344 |
| 1635741_a. Patsas      | 2L | 34634 33C4-33C4   | Dm.23204 | -0,261406 |
| 1626478_a  CG12340     | 2R | 36133 47C1-47C1   | Dm.3126  | -0,289528 |
| 1628319_s. sdk         | X  | 31017 1C2-1C3     | Dm.4732  | -0,29423  |
| 1641272_a  CG34352     | X  | 5740340 8D10-8D10 | Dm.115   | -0,277738 |
| 1631499_a. sws         | X  | 31716 7D1-7D1     | Dm.3604  | -0,289048 |
| 1634991_a  CG8083      | 2R | 35914 45A1-45A1   | Dm.4398  | -0,320264 |
| 1624525_a  CG12998     | X  | 32710 15F4-15F4   | Dm.5433  | 0,290709  |
| 1636006_a  CG17766     | X  | 31155 2B15-2B15   | Dm.22    | -0,274677 |
| 1639524_a  CG18604     | 2R | 37154 55E8-55E9   | Dm.690   | -0,265448 |
| 1634520_a  vn          | 3L | 38657 64E12-64F2  | Dm.2441  | -0,329144 |
| 1625058_a  yellow-d    | 2R | 37703 59D9-59D9   | Dm.22926 | 0,253952  |
| 1630995_a  chif        | 2L | 34974 35F1-35F12  | Dm.3792  | -0,276493 |
| 1624856_a  c(2)M       | 2L | 34964 35F1-35F1   | Dm.19842 | -0,254101 |
| 1637660_a  CG5150      | 3L | 38633 64D5-64D5   | Dm.3933  | -0,331698 |
| 1631516_s. skd         | 3L | 43906 78A2-78A2   | Dm.3624  | -0,287924 |
| 1636145_a  CG7219      | 2L | 34091 28D3-28D3   | Dm.18230 | -0,263666 |
| 1638770_a. cenB1A      | 3R | 42735 94E1-94E1   | Dm.6985  | -0,241633 |
| 1630772_a  sqz         | 3R | 42300 91F4-91F4   | Dm.2401  | -0,278216 |
| 1641412_a  CG31809     | 2L | 318954 36B2-36B2  | Dm.30845 | -0,275802 |
| 1626259_a  su(s)       | X  | 31012 1B13-1B13   | Dm.43    | -0,267804 |
| 1636614_a. vav         | X  | 32920 18B6-18B7   | Dm.218   | -0,219486 |
| 1623827_a. fra         | 2R | 36377 49A10-49B3  | Dm.2428  | -0,241044 |
| 1638547_s. CG7955      | 3L | 38193 62A8-62A9   | Dm.12977 | -0,212434 |
| 1640997_a  CG30122     | 2R | 37146 55E3-55E3   | Dm.12100 | -0,224354 |
| 1627761_a  fat2        | 3L | 40191 76E1-76E1   | Dm.3778  | -0,239393 |
| 1627996_a. Pi4Kllalpha | 3R | 40670 83B1-83B2   | Dm.7792  | -0,218219 |
| 1634804_a  CG15819     | 2L | 34028 28A1-28A1   | Dm.13216 | -0,227358 |
| 1623785_a. pbl         | 3L | 38879 66A18-66A1  | Dm.2712  | -0,242323 |
| 1638378_a  CG13116     | 2L | 34288 30C6-30C6   | Dm.4877  | -0,231059 |
| 1635181_a  CG3337      | 3R | 42519 93C7-93C7   | Dm.24083 | -0,220433 |
| 1628044_a  CG10214     | 3R | 42811 95B1-95B1   | Dm.23336 | -0,22033  |
| 1635310_s. CG31688     | 2L | 35314 38C6-38C7   | Dm.7420  | -0,213297 |
| 1632819_a  CG31224     | 3R | 42237 91B8-91B8   | Dm.12853 | -0,194118 |
| 1626413_a  Rbp1-like   | X  | 32293 11F1-11F1   | Dm.14416 | -0,164559 |
| 1641078_s. GalNAc-T1   | 2R | 36717 52A6-52A6   | Dm.3404  | -0,20906  |
| 1626798_a. Bsg25D      | 2L | 33757 25D2-25D3   | Dm.12836 | -0,198335 |
| 1635117_a  fu          | X  | 32855 17D1-17D1   | Dm.17302 | -0,191298 |
| 1637627_a  Ptp4E       | X  | 31425 4D7-4D7     | Dm.1678  | -0,212176 |
| 1633247_a  CG7006      | 3R | 42963 96B1-96B1   | Dm.5514  | -0,201249 |
| 1636496_a  Nup153      | X  | 32630 14F2-14F2   | Dm.7275  | -0,203929 |
| 1627759_a  CG30080     | 2R | 246441 52C1-52C1  | Dm.21323 | -0,223334 |
| 1628613_a. CG30494     | 2R | 35698 43E6-43E6   | Dm.19215 | -0,20571  |
| 1639986_a  CG6854      | 3L | 39645 71B4-71B5   | Dm.4243  | -0,193117 |
| 1634904_s. RhoGEF2     | 2R | 36915 53E4-53F1   | Dm.2959  | -0,205942 |
| 1625345_a  CG18508     | X  | 59253 3C9-3C9     | Dm.5987  | -0,173204 |
| 1634077_a  CG4789      | X  | 32668 15A9-15A9   | Dm.5281  | -0,207861 |
| 1632251_s. CG6181      | 2L | 34541 32D3-32D3   | Dm.12439 | -0,192945 |
| 1638999_a  rno         | 3L | 38027 61B2-61B2   | Dm.15967 | -0,177046 |
| 1632654_a  l(2)37Cg    | 2L | 35196 37C1-37C1   | Dm.30851 | -0,203436 |

|                        |    |         |            |          |           |
|------------------------|----|---------|------------|----------|-----------|
| 1632418_s.pum          | 3R | 41094   | 85C4-85D1  | Dm.1115  | -0,184707 |
| 1628825_at CG8092      | 2R | 36685   | 51E5-51E7  | Dm.3651  | -0,196829 |
| 1630639_at dsd         | 3R | 43315   | 98A10-98A  | Dm.7161  | -0,213117 |
| 1629552_at rdgBbeta    | 2R | 37011   | 54D6-54D6  | Dm.671   | -0,182238 |
| 1623312_s.CG11836      | 3R | 43007   | 96B20-96B2 | Dm.3637  | -0,188614 |
| 1634668_at lce         | 3R | 43514   | 99C1-99C1  | Dm.2333  | -0,161379 |
| 1636468_a.CG5033       | 2R | 37036   | 54E9-54E9  | Dm.676   | -0,178561 |
| 1641352_at CG7922      | 3R | 42543   | 93E2-93E2  | Dm.10217 | -0,181493 |
| 1639575_at CG18446     | 2R | 36023   | 46C1-46C1  | Dm.5946  | -0,157433 |
| 1633243_at sced        | 2R | 35564   | 42C3-42C3  | Dm.11602 | -0,173616 |
| 1631119_at Cip4        | 3L | 38534   | 64B1-64B2  | Dm.7348  | -0,174514 |
| 1631849_at heix        | 2L | 34961   | 35F1-35F1  | Dm.2593  | -0,175672 |
| 1638012_at rt          | 3L | 39297   | 68C13-68C1 | Dm.6018  | -0,170655 |
| 1636237_s.l(1)G0222    | X  | 32732   | 16B5-16B6  | Dm.11951 | -0,157902 |
| 1627612_a.Crag         | X  | 31800   | 7F7-7F8    | Dm.7132  | -0,164058 |
| 1638637_at CG34246     | 3L | 5740624 |            | Dm.35988 | -0,18605  |
| 1631286_at CG7857      | 3L | 39671   | 71D3-71D3  | Dm.3221  | -0,162004 |
| 1632649_at RluA-2      | 2L | 34440   | 31F1-31F1  | Dm.4124  | -0,15797  |
| 1631937_at CG31755     | 2L | 34331   | 30F5-30F5  | Dm.14021 | -0,193166 |
| 1637022_at CG3532      | 3R | 41459   | 87A5-87A5  | Dm.18760 | -0,172537 |
| 1640235_at W           | 3L | 40009   | 75C1-75C1  | Dm.5624  | -0,19865  |
| 1625973_a.CG3038       | X  | 30970   | 1A1-1A1    | Dm.6474  | -0,160078 |
| 1638854_s.CG17667      | 3L | 39453   | 69E2-69E3  | Dm.947   | -0,18797  |
| 1628853_at CG8915      | X  | 32715   | 15F4-15F4  | Dm.192   | -0,175697 |
| 1629337_at CG32721     | X  | 31681   | 7B7-7B7    | Dm.3142  | -0,165712 |
| 1625740_at CG7466      | 2L | 34099   | 28D3-28D1  | Dm.2153  | -0,236865 |
| 1626028_at CG4783      | 3R | 42381   | 92B9-92B9  | Dm.1257  | -0,28689  |
| 1635273_s.kek5         | X  | 32930   | 18C3-18C7  | Dm.33776 | -0,296418 |
| 1626323_s.CG17255      | X  | 31976   | 9C6-9D1    | Dm.11437 | -0,274898 |
| 1626888_at CG9426      | 2L | 34719   | 34A10-34A  | Dm.13511 | -0,256188 |
| 1639731_at CG7785      | 3R | 42158   | 90E1-90E1  | Dm.6673  | -0,314582 |
| 1635343_a.Ckl1alpha-i3 | 3L | 38088   | 61C8-61C8  | Dm.2861  | -0,274109 |
| 1637286_a.raw          | 2L | 44851   | 29E4-29E6  | Dm.1634  | -0,269639 |
| 1636409_at CG11034     | 2L | 33810   | 25F5-25F5  | Dm.26736 | -0,278007 |
| 1629295_at CHES-1-like | X  | 31678   | 7B6-7B6    | Dm.31076 | -0,284091 |
| 1635000_at Glycogenin  | 2R | 37419   | 57D1-57D1  | Dm.30881 | -0,283871 |
| 1630411_at CG9945      | 2R | 37329   | 57A7-57A7  | Dm.5593  | -0,266822 |
| 1635938_s.Ork1         | X  | 32020   | 9F7-9F8    | Dm.3389  | -0,280196 |
| 1626465_a.hep          | X  | 32256   | 11D10-11D  | Dm.5867  | -0,299459 |
| 1624714_at woc         | 3R | 47249   | 97E11-97E1 | Dm.1766  | -0,278751 |
| 1633412_s.CG3249       | X  | 31459   | 4F9-4F10   | Dm.3811  | -0,25255  |
| 1626051_at CG13339     | 2R | 36528   | 50C6-50C6  | Dm.35325 | -0,273412 |
| 1631691_at CG16772     | 2L | 35281   | 38A8-38A8  | Dm.5776  | -0,311437 |
| 1638370_s.CG12701      | X  | 32994   | 18F1-18F2  | Dm.22844 | -0,264295 |
| 1641575_at Cad87A      | 3R | 41441   | 87A1-87A1  | Dm.10799 | -0,271548 |
| 1633233_a.CG15817      | 3R | 43462   | 99A1-99A1  | Dm.3012  | -0,264853 |
| 1623615_at CG8675      | X  | 32716   | 15F4-15F4  | Dm.8347  | -0,240087 |
| 1627068_at Cyp4aa1     | 2R | 36752   | 52D4-52D4  | Dm.33964 | 0,235215  |
| 1627614_at chn         | 2R | 36678   | 51E1-51E2  | Dm.11696 | -0,257258 |
| 1631777_a.fz4          | X  | 31659   | 6F5-6F5    | Dm.92    | -0,266314 |
| 1633304_at p24-1       | X  | 32140   | 10F1-10F1  | Dm.5323  | -0,294904 |
| 1628884_at PGRP-SA     | X  | 32099   | 10C6-10C6  | Dm.14186 | -0,290138 |
| 1630430_a.CG30437      | 2R | 35494   | 41F1-41F1  | Dm.21950 | -0,24378  |

|            |           |    |         |             |          |           |
|------------|-----------|----|---------|-------------|----------|-----------|
| 1632499_at | CG14796   | X  | 31111   | 2B2-2B2     | Dm.26431 | -0,262563 |
| 1635909_at | cic       | 3R | 53560   | 92E2-92E2   | Dm.5727  | -0,257907 |
| 1629198_at | l(1)G0095 | X  | 31793   | 7F4-7F4     | Dm.4600  | -0,236759 |
| 1635173_at | pgant5    | 2L | 326151  | 25C4-25C5   | Dm.4033  | -0,297323 |
| 1628129_a  | Sdic4     | X  | 2768886 | 19C1-19C1   | Dm.34221 | -0,282236 |
| 1634114_at | CG31517   | 3R | 251711  | 88A3-88A3   | Dm.3608  | -0,274874 |
| 1625044_at | CG8891    | 2L | 33718   | 25B5-25B5   | Dm.18782 | -0,251954 |
| 1631875_at | CG1172    | 3R | 40647   | 83A1-83A1   | Dm.5196  | -0,238618 |
| 1634437_at | CG10973   | 3L | 39447   | 69E1-69E1   | Dm.20075 | -0,267711 |
| 1639509_at | Nnp-1     | 2L | 44391   | 34B7-34B7   | Dm.7283  | -0,263488 |
| 1628788_a  | dsh       | X  | 32078   | 10B4-10B5   | Dm.2927  | -0,276982 |
| 1630944_s  | CG7536    | X  | 32786   | 16F6-16F6   | Dm.29238 | -0,256936 |
| 1629579_at | CG2478    | 2L | 35325   | 38D2-38D2   | Dm.479   | -0,258572 |
| 1635103_at | trr       | X  | 31149   | 2B14-2B14   | Dm.21    | -0,246059 |
| 1625026_at | CG3348    | 3R | 50082   | 97F1-97F1   | Dm.7343  | -0,271995 |
| 1639771_at | c11.1     | X  | 53436   | 8D4-8D5     | Dm.2077  | -0,267387 |
| 1627571_at | CrebA     | 3L | 39682   | 71E1-71E1   | Dm.6979  | -0,261238 |
| 1630018_at | spn-B     | 3R | 41746   | 88B4-88B4   | Dm.4725  | -0,249763 |
| 1635446_at | CG15043   | X  | 32835   | 17B5-17B5   | Dm.19166 | -0,253303 |
| 1639534_at | CG6792    | 2L | 34622   | 33B11-33B11 | Dm.4104  | -0,283677 |
| 1630329_at | CG1716    | X  | 32301   | 11F4-11F5   | Dm.155   | -0,244969 |
| 1629227_at | baz       | X  | 32703   | 15F1-15F1   | Dm.191   | -0,249377 |
| 1624857_at | CG17510   | 2R | 49892   | 41F5-41F5   | Dm.20453 | -0,259984 |
| 1626591_at | siz       | 3L | 40327   | 78A5-78B1   | Dm.1023  | -0,254355 |
| 1628937_s  | rin       | 3R | 47998   | 87F6-87F7   | Dm.6945  | -0,256135 |
| 1636974_at | dlp       | 3L | 39596   | 70E5-70E7   | Dm.2840  | -0,259681 |
| 1632802_at | Jhl-26    | 2R | 36819   | 53B1-53B1   | Dm.19940 | 0,224506  |
| 1633757_s  | CG10188   | 2L | 35237   | 37E4-37E5   | Dm.10953 | -0,245836 |
| 1632258_s  | Spec2     | 3R | 3772539 | 83B6-83B6   | Dm.4016  | -0,241009 |
| 1640720_a  | CG14872   | 3R | 41893   | 88F7-88F7   | Dm.16842 | -0,226049 |
| 1627096_s  | Tkr       | 2R | 38007   | 60F3-60F5   | Dm.6651  | 0,20461   |
| 1628721_at | CG9864    | 2R | 37287   | 56F11-56F11 | Dm.10928 | -0,247028 |
| 1629852_at | CG9018    | 3L | 38283   | 62D3-62D3   | Dm.12912 | -0,245191 |
| 1624541_at | RhoGAP19D | X  | 33048   | 19D1-19D2   | Dm.7998  | -0,26198  |
| 1637537_at | Lar       | 2L | 35259   | 37F2-38A2   | Dm.24416 | -0,266    |
| 1628160_a  | dom       | 2R | 45655   | 57D11-57D11 | Dm.7802  | -0,236186 |
| 1640098_at | BRWD3     | 3R | 42898   | 95F12-95F11 | Dm.5099  | -0,239311 |
| 1632904_at | CG10354   | 2L | 33964   | 27C4-27C4   | Dm.8576  | -0,230105 |
| 1633463_s  | CG30463   | 2R | 246627  | 53D1-53D4   | Dm.24533 | -0,24849  |
| 1633390_at | CG9056    | X  | 32547   | 13F17-13F11 | Dm.13936 | -0,232796 |
| 1632178_at | enc       | 3L | 44543   | 63F1-63F3   | Dm.1826  | -0,263768 |
| 1641063_s  | Oatp30B   | 2L | 34268   | 30B10-30B10 | Dm.33540 | -0,253602 |
| 1629396_a  | CG8486    | 2L | 34112   | 28F1-28F1   | Dm.18615 | -0,251027 |
| 1637079_at | CG5098    | 2R | 37063   | 55B4-55B5   | Dm.28281 | -0,247463 |
| 1634558_s  | egh       | X  | 31239   | 3A6-3A6     | Dm.8115  | -0,258975 |
| 1626218_s  | oaf       | 2L | 33435   | 22F4-22F4   | Dm.7946  | -0,234669 |
| 1634383_a  | Jhl-21    | 2L | 34624   | 33B11-33C11 | Dm.411   | -0,242803 |
| 1638856_at | CG2650    | X  | 31252   | 3B2-3B2     | Dm.5779  | 0,228216  |
| 1637017_at | Cont      | 3R | 40553   | 82A5-82A5   | Dm.12849 | -0,260842 |
| 1640764_at | Rpll215   | X  | 32100   | 10C6-10C7   | Dm.2925  | -0,25838  |
| 1641381_s  | CG13213   | 2R | 36201   | 47E6-47F1   | Dm.4635  | -0,242752 |
| 1627795_at | lr        | 3R | 42742   | 94E4-94E4   | Dm.5652  | -0,264702 |
| 1635367_at | fs(1)h    | X  | 31722   | 7D3-7D5     | Dm.7909  | -0,23868  |

|                       |    |         |            |            |           |
|-----------------------|----|---------|------------|------------|-----------|
| 1629145_ai HERC2      | X  | 33035   | 19C6-19C6  | Dm.3302    | -0,247809 |
| 1627530_ai CG6700     | 2L | 34496   | 32B1-32B1  | Dm.398     | -0,250117 |
| 1634549_ai CG11750    | X  | 32079   | 10B5-10B5  | Dm.14003   | -0,243615 |
| 1624021_a. dlgl       | X  | 32083   | 10B6-10B1C | Dm.4352    | -0,246348 |
| 1636092_a. wapl       | X  | 31187   | 2D4-2D5    | Dm.7140    | -0,242554 |
| 1638929_ai CG8920     | 2R | 37304   | 56F16-56F1 | Dm.3203    | -0,240915 |
| 1635182_ai wts        | 3R | 43651   | 100A5-100A | Dm.4172    | -0,252574 |
| 1634504_a. sol        | X  | 44014   | 19F5-19F5  | Dm.2998    | -0,266957 |
| 1635506_ai CG11777    | 2R | 36108   | 47A9-47A9  | Dm.20580   | -0,230306 |
| 1624160_ai CG11329    | 2L | 33938   | 26F6-26F6  | Dm.4529    | -0,235666 |
| 1629819_s. Sema-2a    | 2R | 36846   | 53C6-53C7  | Dm.14046   | -0,247065 |
| 1625785_ai l(1)G0196  | X  | 33137   | 20B3-20B3  | Dm.237     | -0,23273  |
| 1635743_ai Vang       | 2R | 35922   | 45A4-45A6  | Dm.7726    | -0,250073 |
| 1629078_s. Pk61C      | 3L | 38017   | 61B1-61B1  | Dm.7033    | -0,252174 |
| 1632472_s. CG4699     | 3R | 41911   | 89A5-89A5  | Dm.10603   | -0,251534 |
| 1637226_ai CG11885    | 2L | 33215   | 21C2-21C2  | Dm.5619    | -0,25432  |
| 1628759_a. CG14073    | 3L | 40046   | 75E1-75E1  | Dm.13637   | -0,238347 |
| 1623565_ai CG17278    | 3R | 50050   | 93B4-93B4  | Dm.3976    | -0,25917  |
| 1628328_ai GstE10     | 2R | 37105   | 55C6-55C6  | Dm.27766   | 0,233984  |
| 1625532_ai cv         | X  | 44510   | 5A13-5A13  | Dm.6914    | -0,226459 |
| 1640433_a. tou        | 2R | 36241   | 48A2-48A3  | Dm.2658    | -0,255973 |
| 1624353_ai CG32654    | X  | 32209   | 11B2-11B3  | Dm.31053   | -0,233236 |
| 1627372_a. lig        | 2R | 35771   | 44A4-44A4  | Dm.517     | -0,236911 |
| 1641075_ai Nup358     | 3R | 43041   | 96C8-96C8  | Dm.11385   | -0,243    |
| 1623837_ai Pez        | 2L | 33882   | 26C3-26C3  | Dm.325     | -0,251385 |
| 1624931_ai cib        | X  | 31359   | 4A5-4A5    | Dm.74      | -0,240502 |
| 1628199_ai CG15345    | X  | 50402   | 7E6-7E6    | Dm.4909    | -0,253742 |
| 1632339_s. cher       | 3R | 42066   | 89E12-89E1 | Dm.6964    | -0,232092 |
| 1634740_ai tth        | X  | 32318   | 12A8-12A8  | Dm.3521    | -0,221829 |
| 1636864_ai corto      | 3R | 40616   | 82E7-82E7  | Dm.24160   | -0,221922 |
| 1631619_a. MTF-1      | 3L | 39089   | 67B5-67B6  | Dm.4219, D | -0,236806 |
| 1632784_ai cnk        | 2R | 36952   | 54B7-54B7  | Dm.664     | -0,235423 |
| 1638135_ai CG10555    | X  | 31771   | 7E6-7E6    | Dm.3671    | -0,227733 |
| 1631712_ai CG13398    | 2L | 34169   | 29C3-29C3  | Dm.13498   | -0,238193 |
| 1624208_s. Arf51F     | 2R | 36699   | 51F6-51F6  | Dm.2891    | -0,236544 |
| 1625923_s. Flo-2      | X  | 32425   | 12F5-13A1  | Dm.6791    | -0,223251 |
| 1634565_ai CG4957     | 2L | 34374   | 31B1-31B1  | Dm.2216    | -0,243553 |
| 1627054_ai osp        | 2L | 34850   | 35B3-35B4  | Dm.2714    | -0,246842 |
| 1634255_ai CG12721    | X  | 32176   | 11A3-11A3  | Dm.20582   | -0,224933 |
| 1641644_s. crm        | X  | 31268   | 3B3-3B4    | Dm.68      | -0,222823 |
| 1628109_ai CG1737     | X  | 32077   | 10B3-10B4  | Dm.133     | -0,233147 |
| 1633026_a. CG31158    | 3R | 42665   | 94B5-94B6  | Dm.20724   | -0,233396 |
| 1629430_s. regucalcin | X  | 32165   | 11A1-11A1  | Dm.3430, D | -0,237092 |
| 1631827_ai CG15863    | 2R | 36034   | 46C7-46C7  | Dm.30958   | -0,248033 |
| 1625503_ai CG32425    | 3L | 40273   | 77C6-77C6  | Dm.1016    | -0,269096 |
| 1628172_ai msp        | 3R | 41952   | 89B1-89B2  | Dm.4280    | -0,231613 |
| 1626575_ai CG1657     | X  | 32070   | 10B3-10B3  | Dm.132     | -0,235952 |
| 1633611_s. CG32043    | 3L | 39099   | 67B8-67B9  | Dm.6414    | -0,23561  |
| 1641123_ai CG34186    | 2R | 5740790 |            | Dm.34782   | -0,250659 |
| 1626499_ai GATAe      | 3R | 41945   | 89A12-89A  | Dm.1217    | -0,251569 |
| 1627864_ai l(2)k07433 | 2R | 36978   | 54C1-54C3  | Dm.20641   | -0,229809 |
| 1639115_s. rtGEF      | 2L | 35306   | 38C5-38C5  | Dm.477     | -0,239891 |
| 1633599_a. Pepck      | 2R | 37131   | 55D3-55D3  | Dm.6919    | 0,214697  |

|                      |    |        |            |          |           |
|----------------------|----|--------|------------|----------|-----------|
| 1640042_ai CG12299   | 2L | 34483  | 32A5-32A5  | Dm.396   | -0,239813 |
| 1623505_s. Ubi-p5E   | X  | 326237 | 5E4-5E4    | Dm.21220 | 0,192797  |
| 1633436_ai CG14149   | 3L | 39219  | 67F1-67F1  | Dm.6105  | -0,239412 |
| 1641747_s. Atf6      | 2R | 35480  | 41D4-41E1  | Dm.21372 | -0,229963 |
| 1623496_ai kz        | X  | 31205  | 2F1-2F1    | Dm.33    | -0,244671 |
| 1624778_ai pcm       | X  | 32935  | 18C7-18C7  | Dm.7395  | -0,215672 |
| 1639917_ai CG32541   | X  | 32889  | 17F3-18A2  | Dm.4349  | -0,214572 |
| 1637169_ai Nat1      | X  | 32934  | 18C7-18C7  | Dm.14739 | -0,245933 |
| 1624755_a. flw       | X  | 44289  | 9B14-9C1   | Dm.7222  | -0,244749 |
| 1638200_ai pcx       | X  | 31204  | 2F1-2F1    | Dm.12469 | -0,221178 |
| 1639264_ai Ddx1      | 3L | 40457  | 79D3-79D3  | Dm.2501  | -0,23575  |
| 1637410_s. l(2)gl    | 2L | 33156  | 21A5-21A5  | Dm.2784  | -0,225681 |
| 1631231_ai fz        | 3L | 45307  | 70D4-70D5  | Dm.1456  | -0,20827  |
| 1631243_s. l(3)05822 | 3R | 47260  | 91A1-91A2  | Dm.33520 | -0,2532   |
| 1627171_ai l(3)87Df  | 3R | 49762  | 87D9-87D9  | Dm.20512 | -0,249826 |
| 1627394_s. aop       | 2L | 33392  | 22D1-22D1  | Dm.267   | -0,211737 |
| 1639519_ai CG5850    | 2L | 34327  | 30F2-30F2  | Dm.378   | -0,238804 |
| 1636161_ai CG3371    | 3L | 38082  | 61C8-61C8  | Dm.11333 | -0,22686  |
| 1624385_ai CG17735   | 3R | 40596  | 82D5-82D5  | Dm.31226 | -0,22312  |
| 1641489_ai CG33169   | 3L | 40504  | 80B1-80B1  | Dm.20419 | -0,217928 |
| 1640380_a. MED14     | 3L | 38073  | 61C6-61C6  | Dm.9399  | -0,237324 |
| 1634954_ai CG4756    | X  | 32664  | 15A8-15A8  | Dm.5131  | -0,218246 |
| 1629779_ai Mcr       | 2L | 44071  | 28E1-28E3  | Dm.1422  | -0,245633 |
| 1628978_ai CG5360    | 2R | 37723  | 59E2-59E2  | Dm.13577 | -0,246729 |
| 1641082_ai Corp      | X  | 31764  | 7E1-7E1    | Dm.105   | -0,201691 |
| 1629367_ai CG15534   | 3R | 43613  | 99F4-99F4  | Dm.27454 | 0,214552  |
| 1632565_ai Bin1      | 3R | 41965  | 89B7-89B7  | Dm.20197 | -0,249671 |
| 1637467_ai CG5245    | 3R | 41530  | 87B10-87B1 | Dm.27273 | -0,238862 |
| 1639690_a. sba       | 3R | 42824  | 95C9-95C12 | Dm.2202  | -0,225273 |
| 1629117_ai GalNAc-T2 | X  | 32836  | 17B6-17B6  | Dm.7692  | -0,218426 |
| 1637936_ai CG32512   | X  | 33085  | 19E7-19E7  | Dm.29242 | -0,197246 |
| 1623543_ai CG5807    | 3R | 42956  | 96A23-96A2 | Dm.3209  | -0,238103 |
| 1623728_ai CG13689   | 2L | 33241  | 21E2-21E2  | Dm.26695 | -0,227021 |
| 1623776_s. dsx       | 3R | 40940  | 84E5-84E6  | Dm.3308  | -0,267083 |
| 1623887_ai CG12367   | 2R | 36301  | 48E2-48E3  | Dm.573   | -0,194957 |
| 1632840_s. fus       | 2R | 44095  | 52B3-52B5  | Dm.7727  | -0,2221   |
| 1639555_ai CG17724   | 2R | 246682 | 49F4-49F7  | Dm.6975  | -0,223272 |
| 1634533_ai UbcD10    | 2R | 37035  | 54E9-54E9  | Dm.21581 | -0,216083 |
| 1632326_ai CG30105   | 2R | 246459 | 54C12-54C1 | Dm.30988 | -0,212861 |
| 1631271_a. hang      | X  | 32613  | 14C4-14C4  | Dm.7016  | -0,237759 |
| 1636921_ai l(2)06496 | 2R | 46074  | 59C2-59C3  | Dm.23950 | -0,223271 |
| 1634015_s. CG5077    | 3R | 42412  | 92E2-92E2  | Dm.4545  | -0,192281 |
| 1625684_ai CG11523   | 3L | 40458  | 79D3-79D3  | Dm.23296 | -0,167463 |
| 1638368_ai CG31674   | 2L | 318878 | 38F1-38F1  | Dm.21186 | -0,20215  |
| 1638119_ai PGRP-LE   | X  | 32534  | 13F1-13F1  | Dm.3371  | -0,19108  |
| 1628726_s. Rgl       | 3L | 44115  | 70C5-70C5  | Dm.6516  | -0,194701 |
| 1625269_ai CG9004    | 3L | 38303  | 62D7-62D7  | Dm.11397 | -0,145842 |
| 1637130_ai CG30159   | 2R | 35611  | 42E4-42E4  | Dm.33454 | -0,161705 |
| 1639349_ai CG8173    | X  | 32753  | 16C1-16C1  | Dm.6499  | -0,177907 |
| 1638229_ai l(3)01239 | 3L | 46121  | 68A4-68A4  | Dm.11375 | -0,196034 |
| 1632839_a. CG8312    | 3R | 41163  | 85D27-85E1 | Dm.11523 | -0,160552 |
| 1632381_ai dome      | X  | 32976  | 18D13-18E1 | Dm.2836  | -0,168058 |
| 1631749_ai CG8928    | X  | 32558  | 14A1-14A1  | Dm.10807 | -0,176139 |

|                       |    |         |            |          |           |
|-----------------------|----|---------|------------|----------|-----------|
| 1637190_at CG9149     | 3L | 38147   | 61F5-61F5  | Dm.4949  | -0,16298  |
| 1637428_a.pyd         | 3R | 41062   | 85B2-85B7  | Dm.7093  | -0,177513 |
| 1627668_s.bbx         | X  | 3772670 | 19F5-19F6  | Dm.2637  | -0,177018 |
| 1640102_at CG17622    | 3R | 42674   | 94B10-94B1 | Dm.27376 | 0,163927  |
| 1630565_at CG17652    | 2L | 33353   | 22B1-22B1  | Dm.18434 | -0,161275 |
| 1634117_at CG6204     | 3R | 42877   | 95F1-95F1  | Dm.1312  | -0,146447 |
| 1636508_at Nca        | 3L | 40186   | 76D8-76D8  | Dm.6656  | -0,18156  |
| 1626483_at Gl         | 3L | 39536   | 70C5-70C6  | Dm.12980 | -0,154549 |
| 1637560_at eIF-4G     | 4  | 43839   | 102C5-102C | Dm.7136  | -0,162314 |
| 1626943_at CG14609    | 3R | 40864   | 84D2-84D2  | Dm.4996  | 0,139833  |
| 1641733_a.CG15645     | X  | 32492   | 13D4-13D4  | Dm.17401 | -0,136552 |
| 1635066_at CG9063     | 3L | 40456   | 79D2-79D3  | Dm.3029  | -0,152365 |
| 1629933_at Sas10      | X  | 31447   | 4F5-4F5    | Dm.19669 | -0,139506 |
| 1638889_at CG3918     | X  | 31585   | 6B1-6B1    | Dm.52    | -0,142274 |
| 1623968_at CG10631    | 2L | 35262   | 38A2-38A2  | Dm.17940 | -0,146248 |
| 1624429_at CG3967     | 3L | 39086   | 67B5-67B5  | Dm.7851  | -0,154156 |
| 1637329_a.tho2        | 2L | 326153  | 22D1-22D1  | Dm.21302 | -0,150853 |
| 1627172_s.CG10254     | 3R | 42793   | 95A7-95A7  | Dm.3186  | -0,142177 |
| 1623670_at CG14562    | 3L | 40439   | 79A4-79A4  | Dm.13295 | -0,163511 |
| 1640252_at mRpL9      | 3R | 41859   | 88F1-88F1  | Dm.12652 | -0,149504 |
| 1631652_at CG7713     | 3R | 42139   | 90C5-90C5  | Dm.5918  | -0,145487 |
| 1624617_at CG1665     | 2R | 36014   | 46B4-46B4  | Dm.12543 | -0,130207 |
| 1629218_at Top3beta   | X  | 31565   | 5E5-5E5    | Dm.2946  | -0,158575 |
| 1630686_at CG2186     | X  | 32017   | 9F5-9F5    | Dm.11488 | -0,216899 |
| 1634587_s.Mnf         | 3L | 39252   | 68A7-68A7  | Dm.7143  | -0,220005 |
| 1630227_a.CG8176      | 3R | 261329  | 85D19-85D  | Dm.26190 | -0,219817 |
| 1636052_at l(1)dd4    | X  | 48481   | 12B4-12B4  | Dm.1749  | -0,201006 |
| 1625333_at CG33172    | X  | 32526   | 13E15-13E1 | Dm.25390 | -0,223072 |
| 1629252_at CG14657    | 3R | 40602   | 82D6-82D6  | Dm.14498 | -0,206463 |
| 1633335_at Sos        | 2L | 34790   | 34D1-34D1  | Dm.4109  | -0,221092 |
| 1639109_a.CRMP        | 3R | 40675   | 83B2-83B2  | Dm.3083  | -0,245233 |
| 1640762_at CG14464    | 2R | 3355132 | 41E3-41E3  | Dm.23697 | -0,224434 |
| 1640528_at CG5053     | 3R | 43096   | 96E8-96E8  | Dm.4682  | -0,216938 |
| 1634576_at N          | X  | 31293   | 3C7-3C9    | Dm.4702  | -0,199271 |
| 1639770_at CG30421    | 2R | 37954   | 60D16-60E1 | Dm.3844  | -0,212248 |
| 1640122_at SelG       | X  | 32149   | 10F4-10F4  | Dm.145   | -0,246069 |
| 1638682_a.neur        | 3R | 41085   | 85C2-85C3  | Dm.1114  | -0,216389 |
| 1630795_at CG12125    | X  | 31775   | 7E9-7E9    | Dm.3784  | -0,211744 |
| 1635619_a.cnn         | 2R | 36491   | 50A8-50A9  | Dm.4773  | -0,232682 |
| 1640837_a.lmpL1       | 3L | 39499   | 70A7-70A7  | Dm.7761  | 0,24307   |
| 1638845_at CG18643    | 3R | 41371   | 86E5-86E5  | Dm.31244 | -0,221122 |
| 1641504_s.wdp         | 2R | 37548   | 58D3-58D3  | Dm.7396  | -0,251898 |
| 1640734_a.CG16718     | 3R | 42340   | 92A11-92A  | Dm.22485 | -0,235473 |
| 1638868_at Mcm10      | 2L | 35390   | 39B1-39B1  | Dm.19862 | -0,217985 |
| 1635846_a.orb         | 3R | 42752   | 94E9-94E9  | Dm.1293  | -0,233961 |
| 1636474_at CG12602    | 2L | 34587   | 33A1-33A1  | Dm.18113 | -0,227386 |
| 1624635_at CG14210    | X  | 32958   | 18D3-18D3  | Dm.6071  | -0,237939 |
| 1628416_s.Dp1         | 2R | 37116   | 55C8-55C8  | Dm.7368  | -0,232958 |
| 1626706_at katanin-60 | 3R | 53566   | 82F6-82F6  | Dm.1067  | -0,193678 |
| 1632908_s.Lerp        | 3R | 43223   | 97D2-97D3  | Dm.16426 | -0,207552 |
| 1640922_a.Hnf4        | 2L | 44544   | 29E4-29E4  | Dm.4524  | -0,213382 |
| 1634858_s.wkd         | 3R | 41390   | 86E11-86E1 | Dm.16985 | -0,204619 |
| 1629372_a.sec71       | 2L | 34785   | 34D1-34D1  | Dm.12060 | -0,220094 |

|                        |    |         |            |          |           |
|------------------------|----|---------|------------|----------|-----------|
| 1629866_at Suv4-20     | X  | 31015   | 1B13-1B14  | Dm.4968  | -0,206186 |
| 1623320_at CG3711      | X  | 31037   | 1D2-1D2    | Dm.44    | -0,226495 |
| 1638345_at fog         | X  | 33148   | 20D2-20E1  | Dm.2819  | -0,216891 |
| 1639438_at msl-1       | 2L | 35121   | 36F11-37A1 | Dm.458   | -0,217348 |
| 1639582_at Pde11       | 2L | 35107   | 36F6-36F6  | Dm.13948 | -0,211869 |
| 1628127_at CG9926      | 3R | 41700   | 88A3-88A3  | Dm.1190  | -0,21355  |
| 1637302_s. flfl        | 3R | 41675   | 87F10-87F1 | Dm.14510 | -0,25138  |
| 1637180_at CG17977     | 2R | 50251   | 44A4-44A4  | Dm.17826 | -0,209584 |
| 1628901_at Asx         | 2R | 36612   | 51A4-51A4  | Dm.2970  | -0,208112 |
| 1625012_s. vir-1       | 2L | 34652   | 33E3-33E4  | Dm.12811 | -0,23169  |
| 1633016_a. stau        | 2R | 37065   | 55B5-55B7  | Dm.4722  | -0,234977 |
| 1634190_a. CG6138      | 2L | 34454   | 32A1-32A1  | Dm.20720 | 0,206968  |
| 1641342_at cag         | 2R | 36157   | 47C5-47C6  | Dm.19906 | -0,208625 |
| 1632545_s. CG5522      | 2R | 36881   | 53D8-53D9  | Dm.6392  | -0,218029 |
| 1638940_at RhoGAP15B   | X  | 32686   | 15C4-15C4  | Dm.11080 | -0,203704 |
| 1624589_a. cenG1A      | 2L | 34803   | 34D6-34E2  | Dm.1977  | -0,201577 |
| 1629286_s. Lag1        | X  | 50392   | 5E3-5E4    | Dm.1552  | -0,217736 |
| 1634211_at arr         | 2R | 44279   | 50A9-50A1  | Dm.1842  | -0,212443 |
| 1630165_s. Sin3A       | 2R | 36382   | 49B5-49B7  | Dm.4374  | -0,213271 |
| 1626239_at bon         | 3R | 44235   | 92F2-92F3  | Dm.1848  | -0,230601 |
| 1631212_at MED22       | X  | 31038   | 1D2-1D2    | Dm.31032 | -0,223224 |
| 1637798_at CG15717     | X  | 32262   | 11E1-11E1  | Dm.5328  | -0,230364 |
| 1632332_at CG5447      | 3R | 43192   | 97B3-97B3  | Dm.3550  | -0,201984 |
| 1631597_at foxo        | 3R | 41709   | 88A5-88A8  | Dm.3957  | -0,222027 |
| 1639499_at CG2025      | X  | 32143   | 10F2-10F2  | Dm.1603  | -0,200673 |
| 1626494_at DNAPol-eta  | 3L | 40438   | 79A4-79A4  | Dm.3449  | -0,185063 |
| 1638873_at CG6175      | 3L | 39271   | 68C1-68C2  | Dm.13613 | -0,179614 |
| 1638264_at CG1304      | X  | 33074   | 19E5-19E5  | Dm.12834 | -0,265475 |
| 1641287_at CG8301      | 3R | 41160   | 85D26-85D2 | Dm.6393  | -0,22405  |
| 1634654_at poe         | 2L | 46243   | 28D11-28E1 | Dm.7936  | -0,20819  |
| 1639266_at CG15744     | X  | 2768909 | 11E9-11E9  | Dm.3618  | -0,21968  |
| 1622931_at CG5146      | 3L | 38630   | 64D4-64D5  | Dm.852   | -0,192053 |
| 1626249_s. CycE        | 2L | 34924   | 35D4-35D4  | Dm.3509  | -0,218261 |
| 1639803_at CG5151      | 3L | 39772   | 72D9-72D9  | Dm.3702  | -0,211749 |
| 1627465_at Mes4        | 2R | 37560   | 58D8-58D8  | Dm.18851 | -0,215127 |
| 1637456_at CG8878      | 2R | 36302   | 48E2-48E3  | Dm.3130  | -0,222191 |
| 1640871_at Cortactin   | 3R | 42491   | 93B8-93B9  | Dm.4483  | -0,215814 |
| 1631419_at Yp3         | X  | 32339   | 12C1-12C1  | Dm.5739  | 0,162055  |
| 1639309_at CG12333     | 3R | 42218   | 91A5-91A6  | Dm.12926 | -0,22977  |
| 1623787_at CG7144      | 2L | 34064   | 28C4-28C4  | Dm.11204 | -0,208214 |
| 1632271_a. CG7971      | 3L | 38206   | 62A10-62A1 | Dm.4138  | -0,206894 |
| 1624520_a. ftz-f1      | 3L | 40045   | 75D8-75E1  | Dm.995   | -0,193621 |
| 1625109_at Rrp1        | 2L | 33500   | 23C3-23C4  | Dm.280   | -0,205609 |
| 1634178_at CG4351      | X  | 32259   | 11D10-11D1 | Dm.7052  | -0,192282 |
| 1633749_at CG6337      | 2R | 36530   | 50C6-50C6  | Dm.5230  | 0,185544  |
| 1626835_at Syb         | 2R | 36080   | 46F8-46F8  | Dm.19412 | -0,217852 |
| 1632063_s. CG11357     | 3L | 38561   | 64B9-64B9  | Dm.20483 | -0,217327 |
| 1636805_a. CG8944      | X  | 32517   | 13E12-13E1 | Dm.11763 | -0,200582 |
| 1637623_at CG14270     | X  | 31319   | 3D4-3D4    | Dm.4952  | -0,236552 |
| 1626580_at aft         | 2R | 37034   | 54E9-54E9  | Dm.19954 | -0,166556 |
| 1640509_s. lama        | 3L | 38610   | 64C12-64C1 | Dm.6871  | -0,219573 |
| 1623281_s. His2B:CG179 | 2L | 326273  | 39D3-39D3  | Dm.30218 | -0,200262 |
| 1623830_at CG13350     | 2R | 36551   | 50C23-50C2 | Dm.611   | -0,193825 |



|            |           |    |        |            |          |           |
|------------|-----------|----|--------|------------|----------|-----------|
| 1635356_at | CG8816    | 2R | 36379  | 49B5-49B5  | Dm.21574 | -0,221911 |
| 1635437_at | CG11920   | 3R | 43009  | 96B20-96B2 | Dm.1328  | -0,214231 |
| 1636730_at | CG13373   | X  | 30988  | 1B4-1B4    | Dm.17788 | -0,213224 |
| 1631772_a  | MTA1-like | 3R | 40693  | 83B7-83B7  | Dm.7240  | -0,204069 |
| 1628189_at | Rep2      | 2R | 35955  | 45C4-45C5  | Dm.4000  | -0,212877 |
| 1628141_at | rhea      | 3L | 38978  | 66D6-66D7  | Dm.894   | -0,206557 |
| 1633964_at | CG3626    | X  | 31377  | 4C2-4C2    | Dm.13990 | -0,214239 |
| 1640266_a  | CG7097    | 2R | 37203  | 56C1-56C4  | Dm.7840  | -0,220251 |
| 1626676_at | plexB     | 4  | 43766  | 102A1-102A | Dm.1700  | -0,203344 |
| 1624826_at | CG8552    | 2L | 34109  | 28E7-28E9  | Dm.11988 | -0,215898 |
| 1626444_at | Fib       | 2R | 37662  | 59C3-59C3  | Dm.2821  | -0,22296  |
| 1638166_at | Rpb10     | 3R | 42942  | 96A18-96A  | Dm.20527 | -0,235323 |
| 1625276_a  | Eip71CD   | 3L | 39675  | 71D3-71D4  | Dm.2545  | -0,244857 |
| 1641033_a  | unk       | 3R | 42738  | 94E1-94E2  | Dm.1291  | -0,215393 |
| 1626232_at | Camta     | 2R | 35974  | 45E1-45E1  | Dm.3685  | -0,206795 |
| 1633227_s  | CG14945   | 2L | 34623  | 33B11-33B1 | Dm.19822 | -0,198479 |
| 1629069_at | CG7504    | 3L | 38904  | 66B7-66B8  | Dm.31993 | -0,173293 |
| 1622925_at | nej       | X  | 43856  | 8F7-8F9    | Dm.4140  | -0,19178  |
| 1628779_a  | svp       | 3R | 41491  | 87B4-87B5  | Dm.20676 | -0,240164 |
| 1632964_at | CG15678   | 2R | 37468  | 57F6-57F6  | Dm.18847 | -0,217047 |
| 1630968_at | CG13907   | 3L | 38104  | 61D2-61D3  | Dm.4970  | -0,220285 |
| 1631355_at | mRpS28    | 2R | 37136  | 55E2-55E2  | Dm.20392 | -0,239456 |
| 1629868_s  | CG3838    | 2L | 34275  | 30B12-30B1 | Dm.2108  | -0,207681 |
| 1632691_at | R         | 3L | 38244  | 62B7-62B7  | Dm.822   | -0,226143 |
| 1626550_at | CG34449   | X  | 31887  |            | Dm.35876 | -0,188723 |
| 1628248_at | Scm       | 3R | 41168  | 85E2-85E2  | Dm.6241  | -0,215531 |
| 1625940_s  | sim       | 3R | 41612  | 87D11-87D  | Dm.4557  | -0,207975 |
| 1633091_at | CG1789    | X  | 31812  | 8A3-8A3    | Dm.11316 | -0,225934 |
| 1637757_at | CG10280   | 3R | 40740  | 83D2-83D2  | Dm.27211 | 0,21418   |
| 1639551_at | bip2      | 4  | 43793  | 102B8-102C | Dm.6500  | -0,233492 |
| 1628451_at | SuUR      | 3L | 45739  | 68A4-68A4  | Dm.7710  | -0,190835 |
| 1637758_at | CG7737    | 2R | 36174  | 47E1-47E1  | Dm.19908 | -0,207743 |
| 1639118_a  | Hrb87F    | 3R | 48535  | 87F7-87F7  | Dm.1711  | -0,196795 |
| 1635792_a  | Ela       | 3R | 42970  | 96B1-96B1  | Dm.5522  | -0,210724 |
| 1637574_at | Acf1      | 3R | 43751  | 100D2-100D | Dm.3122  | -0,211217 |
| 1639574_a  | rdgB      | X  | 32340  | 12C1-12C4  | Dm.7839  | -0,201548 |
| 1626993_at | Sra-1     | 3R | 41861  | 88F1-88F1  | Dm.3506  | -0,205658 |
| 1635444_at | CG32663   | X  | 326228 | 10E6-10F1  | Dm.33491 | -0,188956 |
| 1628548_at | Apc       | 3R | 44642  | 98E5-98E6  | Dm.4863  | -0,193045 |
| 1630207_at | CG16972   | 2L | 34715  | 34A9-34A9  | Dm.11885 | -0,196062 |
| 1627434_at | CG5741    | 3L | 39018  | 66E4-66E4  | Dm.14955 | -0,215747 |
| 1625665_at | mRpL39    | 3L | 39627  | 71B1-71B1  | Dm.2748  | -0,204598 |
| 1638162_s  | CG1244    | 3L | 38327  | 62E8-62E8  | Dm.11285 | -0,189727 |
| 1629363_at | Acyp2     | 3R | 41910  | 89A5-89A5  | Dm.11656 | -0,234559 |
| 1637629_a  | ssh       | 3R | 42986  | 96B10-96B1 | Dm.1518  | -0,207978 |
| 1632791_at | CG32479   | 3L | 38103  | 61D2-61D4  | Dm.31128 | -0,194642 |
| 1625833_at | CG9896    | 2R | 37652  | 59C1-59C1  | Dm.13253 | -0,199134 |
| 1630343_at | CG3679    | X  | 32591  | 14B9-14B9  | Dm.3195  | -0,219752 |
| 1636673_s  | ttk       | 3R | 48317  | 100D1-100D | Dm.1526  | -0,227575 |
| 1634053_at | CG8408    | X  | 32737  | 16B9-16B9  | Dm.194   | -0,186633 |
| 1639526_a  | Mekk1     | 3R | 42253  | 91C5-91C5  | Dm.4356  | -0,208829 |
| 1624726_s  | CG7145    | 3L | 40434  | 78F4-78F4  | Dm.11155 | -0,217921 |
| 1639302_at | CG5645    | 3L | 39382  | 68F5-68F5  | Dm.938   | -0,187993 |

|                          |    |         |            |          |           |
|--------------------------|----|---------|------------|----------|-----------|
| 1631112_ai Epac          | 2R | 35588   | 42C8-42D1  | Dm.4217  | -0,211968 |
| 1637792_ai A3-3          | X  | 43867   | 1E5-1E5    | Dm.10455 | -0,215782 |
| 1628390_ai CG6151        | 3L | 39720   | 72A1-72A1  | Dm.4008  | -0,2183   |
| 1628424_ai CG5913        | 3R | 43132   | 96F6-96F6  | Dm.7622  | -0,172036 |
| 1634524_s. Hdm           | 3L | 40217   | 77A3-77A3  | Dm.11528 | -0,205665 |
| 1628425_ai CG31898       | 2L | 319012  | 29C1-29C1  | Dm.3623  | -0,164538 |
| 1638156_ai fy            | 2L | 34166   | 29C1-29C1  | Dm.4759  | -0,163246 |
| 1639405_ai CG4857        | X  | 31363   | 4B1-4B1    | Dm.3621  | -0,198461 |
| 1636302_s. Su(dx)        | 2L | 33379   | 22C1-22C1  | Dm.2146  | -0,226729 |
| 1629030_a. CG18659       | 2R | 35929   | 45A9-45A1  | Dm.7969  | -0,210987 |
| 1628984_s. HmgZ          | 2R | 37480   | 57F9-57F9  | Dm.20604 | -0,218551 |
| 1639856_ai CG5727        | 2L | 34356   | 31B1-31B1  | Dm.10907 | -0,221129 |
| 1623287_ai CG13921       | 3L | 38222   | 62B1-62B1  | Dm.14911 | -0,216616 |
| 1628795_s. CG9175        | 2L | 33862   | 26B5-26B5  | Dm.3923  | -0,186351 |
| 1625230_a. CG31738       | 2L | 34989   | 36A7-36A9  | Dm.11210 | -0,192532 |
| 1636644_ai Rpl118        | 3R | 48312   | 83A1-83A1  | Dm.1757  | -0,222554 |
| 1630753_ai ric8a         | X  | 31874   | 8D3-8D3    | Dm.6684  | -0,205013 |
| 1624203_s. Gli           | 2L | 34927   | 35D4-35D4  | Dm.6515  | -0,19358  |
| 1632936_ai alpha-Man-III | 3R | 41913   | 89A5-89A5  | Dm.3115  | -0,209793 |
| 1634304_a. CG17233       | 3L | 40220   | 77A3-77A3  | Dm.3971  | -0,207978 |
| 1630911_s. eIF5          | X  | 32566   | 14A5-14A5  | Dm.173   | -0,195278 |
| 1637705_ai ewg           | X  | 30975   | 1A1-1A1    | Dm.4971  | -0,193548 |
| 1631046_s. CG6448        | 2L | 35442   | 40E5-40F1  | Dm.12142 | -0,205516 |
| 1635508_ai Taf10         | 2L | 33469   | 23A5-23A5  | Dm.30758 | -0,208648 |
| 1630396_ai CG4360        | 3R | 42413   | 92E2-92E3  | Dm.10989 | -0,204959 |
| 1633468_x. CG41582       | Un | 5740395 |            | Dm.21410 | 0,225122  |
| 1632630_ai CG7039        | X  | 31841   | 8C9-8C9    | Dm.3677  | -0,198866 |
| 1633554_ai cos           | 2R | 35653   | 43B1-43B2  | Dm.5775  | -0,20424  |
| 1633354_ai Cyp6v1        | X  | 33056   | 19E1-19E1  | Dm.12075 | -0,184034 |
| 1636816_s. CG33090       | 2L | 34835   | 35A4-35A4  | Dm.7918  | -0,208442 |
| 1625515_a. sd            | X  | 32536   | 13F1-13F4  | Dm.6072  | -0,1998   |
| 1633234_ai CG2807        | 2L | 33235   | 21E2-21E2  | Dm.18458 | -0,188308 |
| 1637799_ai r-l           | 3R | 42493   | 93B10-93B1 | Dm.1654  | -0,217084 |
| 1639587_s. CG7458        | 3L | 40441   | 79A4-79A4  | Dm.11044 | -0,165691 |
| 1631362_ai CG11279       | 3L | 39486   | 69F6-69F6  | Dm.18896 | -0,211697 |
| 1638113_ai beta4GalNAc   | 2R | 36585   | 50E6-50E6  | Dm.18830 | -0,19192  |
| 1624675_ai UBL3          | X  | 32541   | 13F13-13F1 | Dm.7131  | -0,211385 |
| 1634442_ai smo           | 2L | 33196   | 21B7-21B7  | Dm.244   | -0,198995 |
| 1635928_a. Pka-C3        | 3L | 39733   | 72B1-72B2  | Dm.7805  | -0,219721 |
| 1639951_ai CG2611        | 2L | 35324   | 38D2-38D2  | Dm.19852 | -0,206935 |
| 1635914_ai CG10413       | 2L | 35111   | 36F7-36F7  | Dm.6777  | -0,20877  |
| 1627334_ai Tsp39D        | 2L | 35405   | 39D1-39D1  | Dm.22927 | -0,194856 |
| 1635567_s. swm           | 2L | 35235   | 37E4-37E4  | Dm.12338 | -0,191031 |
| 1635153_ai Gfat2         | 3R | 43373   | 98C4-98C4  | Dm.12971 | -0,194755 |
| 1632134_s. Axn           | 3R | 43565   | 99D2-99D3  | Dm.7154  | -0,203868 |
| 1625888_a. gry           | 3L | 38391   | 63B11-63B1 | Dm.9462  | -0,184623 |
| 1636868_ai CG14939       | 2L | 34593   | 33A2-33A2  | Dm.2062  | -0,18568  |
| 1622903_s. Tango10       | X  | 32125   | 10D8-10D8  | Dm.2186  | -0,203507 |
| 1640892_a. Doa           | 3R | 43415   | 98F1-98F2  | Dm.6767  | -0,1925   |
| 1641481_ai Ugt86Dd       | 3R | 53507   | 86D4-86D4  | Dm.27519 | 0,16644   |
| 1626841_s. ck            | 2L | 34882   | 35B8-35B9  | Dm.2128  | -0,168605 |
| 1634527_s. CG40005       | 2L | 3355118 |            | Dm.33164 | -0,196993 |
| 1630196_ai Bem46         | 2L | 44441   | 23C4-23C4  | Dm.20302 | -0,178372 |

|            |              |    |         |             |          |           |
|------------|--------------|----|---------|-------------|----------|-----------|
| 1625571_at | CG5385       | 2L | 34386   | 31D4-31D4   | Dm.18392 | -0,189292 |
| 1622981_at | usp          | X  | 31165   | 2C7-2C7     | Dm.25    | -0,178729 |
| 1628516_at | CG15432      | 2L | 33647   | 24F2-24F2   | Dm.23843 | -0,200993 |
| 1632089_at | CG4045       | X  | 31176   | 2C10-2C10   | Dm.26191 | -0,191087 |
| 1640324_at | AnnIX        | 3R | 42492   | 93B9-93B1C  | Dm.4864  | -0,215111 |
| 1631594_s  | Pi3K92E      | 3R | 42446   | 92F3-92F3   | Dm.1876  | -0,199961 |
| 1632099_s  | Liprin-alpha | 2L | 249072  | 27A1-27A1   | Dm.12197 | -0,198777 |
| 1636287_at | CG10592      | 3L | 38632   | 64D5-64D5   | Dm.5219  | -0,209385 |
| 1635960_at | slmb         | 3R | 42504   | 93B13-93C1D | Dm.2387  | -0,191117 |
| 1636919_at | mago         | 2R | 37402   | 57C2-57C2   | Dm.19970 | -0,168241 |
| 1637163_at | CG7003       | 3L | 39654   | 71B6-71B6   | Dm.966   | -0,179681 |
| 1635248_at | CG17144      | 3L | 39398   | 69A2-69A2   | Dm.5785  | -0,2184   |
| 1627589_s  | CG9520       | 2L | 34215   | 29F5-29F5   | Dm.366   | -0,189599 |
| 1637773_s  | Baldspot     | 3L | 39860   | 73B4-73B5   | Dm.3261  | -0,191395 |
| 1636033_at | CG31368      | 3R | 41437   | 87A1-87A1   | Dm.10009 | -0,180267 |
| 1624244_at | S6k          | 3L | 38654   | 64E8-64E11  | Dm.856   | -0,206481 |
| 1637768_at | CG30100      | 2R | 246457  | 53B1-53B1   | Dm.16014 | -0,18814  |
| 1640841_at | mts          | 2L | 45959   | 28D1-28D2   | Dm.4245  | -0,186526 |
| 1635260_at | Stam         | 2L | 34505   | 32B2-32B3   | Dm.401   | -0,188125 |
| 1628840_at | ken          | 2R | 37785   | 60A6-60A7   | Dm.2792  | -0,198479 |
| 1639469_a  | Pu           | 2R | 37415   | 57C7-57C8   | Dm.7417  | -0,221489 |
| 1640240_s  | CG4165       | X  | 31458   | 4F10-4F10   | Dm.7220  | -0,17212  |
| 1631248_at | l(1)G0020    | X  | 31811   | 8A2-8A3     | Dm.19627 | -0,178707 |
| 1624058_at | fs(1)N       | X  | 45973   | 1F3-1F3     | Dm.6551  | -0,187445 |
| 1638133_at | qkr58E-3     | 2R | 37559   | 58D7-58D8   | Dm.2101  | -0,194128 |
| 1626280_a  | Chrac-14     | 2L | 3772329 | 29C4-29C5   | Dm.3099  | -0,199842 |
| 1623805_at | CG4875       | X  | 32678   | 15B4-15B4   | Dm.19727 | -0,175155 |
| 1639764_at | CG30020      | 2R | 36156   | 47C5-47C5   | Dm.23234 | -0,16818  |
| 1636691_a  | Sfmbt        | 2L | 34709   | 34A7-34A8   | Dm.11543 | -0,195414 |
| 1627502_at | CG9304       | 2R | 37500   | 58A4-58A4   | Dm.729   | -0,194602 |
| 1624496_at | xl6          | 2L | 33967   | 27C4-27C4   | Dm.33422 | -0,205084 |
| 1640730_at | pygo         | 3R | 43718   | 100C6-100C6 | Dm.5270  | -0,194087 |
| 1640130_at | CG31678      | 2L | 35327   | 38D2-38D4   | Dm.19853 | -0,183367 |
| 1625024_at | zwilch       | 3R | 59247   | 100B6-100E  | Dm.4254  | -0,166812 |
| 1624644_a  | CG5514       | 3R | 43352   | 98B6-98B6   | Dm.11925 | -0,185644 |
| 1625218_at | CG11399      | 3L | 40295   | 77E6-77E6   | Dm.4002  | -0,183506 |
| 1628243_at | dbr          | 2L | 33161   | 21B1-21B1   | Dm.3074  | -0,188843 |
| 1636371_at | CG2941       | X  | 31348   | 3F7-3F7     | Dm.13423 | -0,168682 |
| 1640405_at | l(2)O1810    | 2L | 47253   | 33B9-33B9   | Dm.1496  | -0,202272 |
| 1627598_at | CG11490      | 2L | 33184   | 21B4-21B4   | Dm.243   | -0,194876 |
| 1633778_at | gb           | 3R | 43265   | 97E2-97E2   | Dm.1350  | -0,188611 |
| 1635771_a  | CG32306      | 3L | 38306   | 62E1-62E2   | Dm.6482  | -0,184264 |
| 1623874_at | CG14215      | X  | 32971   | 18D13-18D13 | Dm.224   | -0,174322 |
| 1625437_at | CG32164      | 3L | 59215   | 73B1-73B1   | Dm.1565  | -0,191478 |
| 1629290_at | Smox         | X  | 31738   | 7D14-7D15   | Dm.2941  | -0,18209  |
| 1637951_at | CG8461       | 3R | 41758   | 88C3-88C3   | Dm.1196  | -0,173997 |
| 1627693_at | CG1965       | 3R | 40842   | 84B2-84B2   | Dm.11552 | -0,188597 |
| 1634660_at | mrt          | 3R | 43291   | 97F1-97F1   | Dm.20267 | -0,206258 |
| 1634044_at | bib          | 2L | 34330   | 30F5-30F5   | Dm.3236  | -0,206559 |
| 1640567_at | CG7337       | 2L | 33367   | 22B4-22B6   | Dm.264   | -0,191422 |
| 1632548_a  | Mes2         | 3L | 40514   | 80C1-80C1   | Dm.4368  | -0,169806 |
| 1629762_at | CG5148       | 3R | 42065   | 89E12-89E1  | Dm.20203 | -0,1713   |
| 1623985_at | l(3)j2D3     | 3L | 39374   | 68F3-68F3   | Dm.3655  | -0,178877 |

|                      |    |                   |            |           |
|----------------------|----|-------------------|------------|-----------|
| 1634909_at CG12975   | 3L | 40343 78C2-78C2   | Dm.5873    | -0,188392 |
| 1639444_a CG6454     | 3R | 42904 95F14-95F1  | Dm.23343   | -0,200943 |
| 1625295_at ksr       | 3R | 40660 83A5-83A5   | Dm.2488    | -0,174722 |
| 1635917_at RpL35     | X  | 31483 5A11-5A11   | Dm.19648   | -0,194067 |
| 1628990_at Hmgcr     | 3R | 42803 95B1-95B1   | Dm.21259   | -0,169816 |
| 1641304_s CG9801     | 3R | 41044 85A9-85A1   | Dm.4969    | -0,172865 |
| 1634146_at CG15926   | X  | 32197 11A11-11A   | Dm.12832   | -0,17427  |
| 1638350_at CG6712    | 2L | 34631 33C4-33C4   | Dm.8705    | -0,193404 |
| 1631190_at CG8089    | 2R | 36679 51E2-51E2   | Dm.24518   | -0,160844 |
| 1633403_at Socs44A   | 2R | 35786 44B3-44B3   | Dm.2677    | -0,160866 |
| 1630281_at dpr12     | 2R | 50320 42A1-42A1   | Dm.17879   | 0,181931  |
| 1625421_at CG30377   | 2R | 50252 43F1-43F1   | Dm.12133   | -0,190508 |
| 1637223_s CG8929     | 2R | 37306 56F16-56F1  | Dm.6803    | -0,175377 |
| 1630764_at CG8683    | 2L | 426157 28E6-28E7  | Dm.21374   | -0,204994 |
| 1624864_s dock       | 2L | 33262 21E2-21E2   | Dm.5508    | -0,20897  |
| 1636122_at Socs16D   | X  | 32760 16D4-16D4   | Dm.6250    | -0,178592 |
| 1638819_at CG31712   | 2L | 34320 30F1-30F1   | Dm.377     | -0,191755 |
| 1641445_s CG7192     | X  | 32791 16F6-16F6   | Dm.17327   | -0,190621 |
| 1624766_s Dsp1       | X  | 117294 14B14-14B1 | Dm.2879    | -0,175695 |
| 1639976_at CG7222    | 2R | 36138 47C1-47C1   | Dm.560     | -0,202887 |
| 1626980_at Pli       | 3R | 42821 95C5-95C8   | Dm.1303    | -0,172472 |
| 1641226_a mask       | 3R | 50070 95F3-95F5   | Dm.7426    | -0,184583 |
| 1638359_s CG14478    | 2R | 36964 54B16-54B1  | Dm.11614   | -0,194912 |
| 1636634_a MRP        | 2L | 34686 33F3-33F4   | Dm.1929    | -0,191171 |
| 1627956_x CG14216    | X  | 32973 18D13-18D   | Dm.3992    | -0,19854  |
| 1627431_at CG8155    | 2R | 36698 51F5-51F6   | Dm.4468    | -0,177831 |
| 1640200_at Dys       | 3R | 42327 92A5-92A1   | Dm.16710   | -0,168988 |
| 1636048_at Dak1      | 3R | 43165 96F10-96F1  | Dm.3048, D | -0,195524 |
| 1623383_at Dhc64C    | 3L | 38580 64B17-64C1  | Dm.846     | -0,165525 |
| 1639305_a Khc-73     | 2R | 36718 52A6-52A1   | Dm.350     | -0,182482 |
| 1637730_at CG17361   | 3L | 39548 70C10-70C1  | Dm.23537   | -0,158342 |
| 1628602_a CG9248     | 2L | 35384 39A6-39A7   | Dm.2220    | -0,178729 |
| 1626339_at garz      | 2R | 36337 48F8-48F10  | Dm.5126    | -0,199657 |
| 1631868_at Vap-33-1  | X  | 31349 3F9-3F9     | Dm.4003    | -0,190427 |
| 1640101_at CG8152    | 2R | 36696 51F4-51F4   | Dm.12835   | -0,184242 |
| 1635713_at CG13185   | 2R | 36268 48C5-48C5   | Dm.567     | -0,17339  |
| 1636412_at MICAL     | 3R | 41225 85F5-85F7   | Dm.33543   | -0,176151 |
| 1635021_at disp      | 3R | 44274 83C5-83C5   | Dm.1845    | -0,196026 |
| 1632848_at nmdyn-D6  | X  | 32396 12F1-12F1   | Dm.3287    | -0,17464  |
| 1632922_at NFAT      | X  | 32321 12A9-12B2   | Dm.2918    | -0,186727 |
| 1638871_at SCAR      | 2L | 34519 32C1-32C1   | Dm.402     | -0,195927 |
| 1623881_s Sirt4      | X  | 31480 5A10-5A10   | Dm.11339   | -0,17513  |
| 1637723_at mod(mdg4) | 3R | 49228 93D7-93D9   | Dm.35861   | -0,190691 |
| 1635678_at CG11299   | 2R | 37755 59F6-59F7   | Dm.2037    | -0,199419 |
| 1629072_at su(w[a])  | X  | 31054 1E1-1E1     | Dm.4721    | -0,193875 |
| 1636572_at Duox      | 2L | 33477 23B2-23B2   | Dm.11399   | -0,183182 |
| 1628902_at mRpS11    | 3R | 42061 89E11-89E1  | Dm.20701   | -0,195585 |
| 1633169_at dlt       | 3L | 46719 62B4-62B4   | Dm.7397    | -0,169768 |
| 1638970_at CG14543   | 3R | 43167 96F10-96F1  | Dm.5823    | -0,206515 |
| 1632932_a CG33171    | 3L | 38769 65E1-65E2   | Dm.11036   | -0,183868 |
| 1632397_at CG16868   | 2R | 37298 56F16-56F1  | Dm.11943   | -0,190387 |
| 1634625_at Dnz1      | 2L | 34503 32B1-32B2   | Dm.3214    | -0,201668 |
| 1630007_s Plc21C     | 2L | 33204 21B8-21C1   | Dm.4674    | -0,195963 |

|                      |    |       |            |          |           |
|----------------------|----|-------|------------|----------|-----------|
| 1639034_ai CG7593    | 3R | 43500 | 99B9-99B9  | Dm.23486 | -0,166924 |
| 1640470_s. Fur2      | X  | 32604 | 14C1-14C2  | Dm.6383  | -0,199457 |
| 1631645_ai CG3363    | 2R | 37874 | 60C2-60C2  | Dm.4580  | -0,190756 |
| 1639136_s. psq       | 2R | 36118 | 47A13-47B1 | Dm.7369  | -0,182349 |
| 1630640_ai CG4594    | 2L | 34316 | 30E4-30F1  | Dm.375   | -0,185089 |
| 1630000_ai CG7358    | X  | 32886 | 17F2-17F2  | Dm.11560 | -0,196355 |
| 1640637_ai MED19     | 3L | 39987 | 75A4-75A4  | Dm.2027  | -0,187389 |
| 1637962_ai spir      | 2L | 45931 | 38C5-38C5  | Dm.3356  | -0,177778 |
| 1624037_s. Taf4      | 3L | 39765 | 72D7-72D8  | Dm.7812  | -0,197665 |
| 1634001_ai CG9062    | 2R | 36199 | 47E5-47E6  | Dm.14157 | -0,188289 |
| 1627492_ai CG5018    | 3L | 39774 | 72D10-72D1 | Dm.2039  | -0,174654 |
| 1623853_ai betaggt-l | 2L | 33704 | 25B4-25B4  | Dm.12506 | -0,174073 |
| 1630284_ai CG14082   | 3L | 40088 | 75F7-75F7  | Dm.27176 | 0,202367  |
| 1630636_s. CG2446    | X  | 32123 | 10D6-10D7  | Dm.19556 | -0,195359 |
| 1627245_s. CG5746    | 3R | 42903 | 95F14-95F1 | Dm.1510  | -0,184144 |
| 1631242_ai jumu      | 3R | 41265 | 86B1-86B1  | Dm.3109  | -0,193887 |
| 1632882_ai CG11671   | 3R | 40976 | 84F8-84F8  | Dm.31234 | -0,191024 |
| 1635838_ai CG13545   | 2R | 37675 | 59D1-59D1  | Dm.27784 | 0,179872  |
| 1639459_a. NrX-IV    | 3L | 39387 | 68F6-68F7  | Dm.1843  | -0,178874 |
| 1625343_ai CG5931    | 3L | 39737 | 72C1-72C1  | Dm.973   | -0,187437 |
| 1637747_s. CG8841    | 2R | 36336 | 48F8-48F8  | Dm.12120 | -0,192297 |
| 1640015_ai CG7053    | X  | 32871 | 17D6-17D6  | Dm.33435 | -0,201601 |
| 1631122_ai CG4656    | 3R | 42734 | 94D13-94E1 | Dm.1290  | -0,193611 |
| 1639189_ai Lap1      | 2R | 36670 | 51D4-51D4  | Dm.12431 | -0,179445 |
| 1626985_a. CG7263    | 2L | 33390 | 22D1-22D1  | Dm.7891  | -0,182439 |
| 1640066_ai CG1142    | 3R | 40894 | 84D8-84D8  | Dm.5925  | -0,193477 |
| 1635468_a. CG7730    | 3L | 39908 | 73E4-73E4  | Dm.3614  | -0,165674 |
| 1625233_ai Pi3K68D   | 3L | 39329 | 68D4-68D6  | Dm.7619  | -0,187769 |
| 1640798_a. inx2      | X  | 31646 | 6E4-6E4    | Dm.3095  | -0,170433 |
| 1623058_ai CG32676   | X  | 32005 | 9E1-9E2    | Dm.11844 | -0,192115 |
| 1624690_ai CG6878    | 3L | 39656 | 71B6-71B6  | Dm.29679 | -0,193236 |
| 1625879_ai Pomp      | 2L | 35342 | 38E10-38E1 | Dm.19856 | -0,204866 |
| 1629844_s. rap       | X  | 45922 | 4C11-4C12  | Dm.1470  | -0,163634 |
| 1640854_ai CG31248   | 3R | 40853 | 84C4-84C4  | Dm.3839  | -0,191217 |
| 1638979_a. mu2       | 3L | 38257 | 62B11-62B1 | Dm.6813  | -0,178383 |
| 1640335_ai CG31304   | 3R | 41817 | 88E1-88E1  | Dm.16861 | -0,19236  |
| 1633729_a. Eps-15    | 2R | 37961 | 60E1-60E1  | Dm.781   | -0,193069 |
| 1629842_ai Gap1      | 3L | 39158 | 67C10-67C1 | Dm.919   | -0,200114 |
| 1636347_ai Hs6st     | 3R | 42380 | 92B9-92C1  | Dm.33425 | -0,176995 |
| 1630900_ai Nhe1      | 2L | 33167 | 21B2-21B2  | Dm.33361 | -0,182105 |
| 1640243_ai CG9267    | 2L | 34762 | 34C1-34C1  | Dm.5879  | -0,181475 |
| 1624054_ai Adgf-A    | 3L | 39976 | 75A1-75A1  | Dm.1714  | -0,208249 |
| 1630942_ai CG5742    | 2R | 37072 | 55B9-55B9  | Dm.680   | -0,171027 |
| 1627927_ai CG8443    | 2R | 36793 | 52F5-52F7  | Dm.7233  | -0,191153 |
| 1637584_ai pgant3    | 2R | 35627 | 42E7-42E7  | Dm.3144  | -0,180658 |
| 1630105_ai CG3891    | 3L | 39091 | 67B6-67B6  | Dm.11610 | -0,181218 |
| 1632618_a. cno       | 3R | 40620 | 82F3-82F6  | Dm.4251  | -0,168974 |
| 1628804_ai CG11419   | 2R | 36975 | 54C1-54C1  | Dm.19949 | -0,173443 |
| 1631520_ai CG1845    | 2R | 35648 | 43A2-43A2  | Dm.11599 | -0,204684 |
| 1634924_ai Spt6      | X  | 44000 | 5E4-5E4    | Dm.7373  | -0,18007  |
| 1629577_ai CG5690    | 3L | 38258 | 62B11-62B1 | Dm.4377  | -0,172962 |
| 1629279_ai CG8211    | X  | 32745 | 16B10-16B1 | Dm.17341 | -0,186545 |
| 1637703_a. Socs36E   | 2L | 35085 | 36E6-36E6  | Dm.5707  | -0,199965 |

|                         |    |         |            |          |           |
|-------------------------|----|---------|------------|----------|-----------|
| 1640090_a_slgA          | X  | 33117   | 19F6-20A1  | Dm.6612  | -0,197957 |
| 1623023_at_Slip1        | 4  | 43809   | 102C2-102C | Dm.11434 | -0,194514 |
| 1627684_at_Irrk         | 3R | 42447   | 92F4-92F4  | Dm.24081 | -0,170325 |
| 1628001_at_CG10492      | 2L | 35177   | 37B12-37B1 | Dm.7370  | -0,189081 |
| 1626112_at_alpha-Man-II | 3R | 41126   | 85D15-85D1 | Dm.2459  | -0,193651 |
| 1626654_a_CG11791       | 3R | 43000   | 96B19-96B1 | Dm.1326  | -0,194206 |
| 1632306_at_CG9467       | 3R | 41207   | 85E9-85E9  | Dm.4583  | -0,187314 |
| 1639963_at_CG1951       | 3R | 43423   | 98F5-98F5  | Dm.7736  | -0,182003 |
| 1633560_at_CG16903      | X  | 31178   | 2C10-2C10  | Dm.4166  | -0,179441 |
| 1626384_at_CG12182      | 3L | 38324   | 62E7-62E7  | Dm.3031  | -0,160885 |
| 1630099_at_mip120       | 2R | 36499   | 50A14-50A1 | Dm.33814 | -0,189298 |
| 1631087_a_CG9809        | 3R | 40562   | 82B1-82B1  | Dm.6908  | -0,199725 |
| 1633419_s_CG7341        | 3L | 40004   | 75B10-75B1 | Dm.992   | -0,184968 |
| 1625517_at_Max          | 3L | 40095   | 76A3-76A3  | Dm.3749  | -0,192639 |
| 1630341_at_mbt          | X  | 32631   | 14F2-14F2  | Dm.4406  | -0,161688 |
| 1623138_at_pds5         | 2R | 36286   | 48D7-48D8  | Dm.4304  | -0,166372 |
| 1636741_s_Hsc70Cb       | 3L | 39557   | 70C15-70C1 | Dm.7118  | -0,181222 |
| 1634340_at_CG11970      | 3R | 41072   | 85C1-85C1  | Dm.3129  | -0,177929 |
| 1632355_at_lack         | 2R | 36999   | 54C12-54D1 | Dm.2783  | -0,177932 |
| 1636771_at_CoRest       | X  | 32941   | 18C8-18C8  | Dm.4085  | -0,183318 |
| 1639635_s_CG4196        | 3R | 41827   | 88E2-88E3  | Dm.4290  | -0,191617 |
| 1635476_at_CG9752       | 2R | 37431   | 57D8-57D8  | Dm.21585 | -0,16633  |
| 1626520_at_Rad17        | 3R | 41779   | 88C10-88C1 | Dm.1199  | -0,176009 |
| 1626621_at_CG1407       | 2R | 36043   | 46D5-46D7  | Dm.3930  | -0,190126 |
| 1625806_at_Pp1alpha-96  | 3R | 42922   | 96A5-96A5  | Dm.2362  | -0,195193 |
| 1624365_at_CG10915      | 2R | 37076   | 55B9-55B1  | Dm.12105 | -0,175923 |
| 1631180_at_CG5728       | 3R | 42899   | 95F12-95F1 | Dm.1316  | -0,170357 |
| 1629001_at_CG5787       | 2L | 34684   | 33F3-33F3  | Dm.11772 | -0,174355 |
| 1629098_at_CG7631       | 2L | 34919   | 35D3-35D3  | Dm.26821 | -0,184774 |
| 1626839_s_blot          | 3L | 39939   | 74B1-74B2  | Dm.6622  | -0,190248 |
| 1626355_at_DNApol-epsil | 3R | 42758   | 94E13-94E1 | Dm.1294  | -0,16957  |
| 1623257_a_CG17665       | 2R | 3355010 |            | Dm.10741 | -0,188429 |
| 1631616_at_CG15308      | X  | 50415   | 9B4-9B4    | Dm.25253 | 0,193948  |
| 1626967_at_CalpB        | 3L | 39165   | 67D1-67D1  | Dm.2874  | -0,199161 |
| 1635633_s_bin3          | 2R | 35552   | 42A13-42A1 | Dm.2881  | -0,173413 |
| 1636909_at_CG4078       | X  | 31497   | 5B6-5B6    | Dm.11709 | -0,165858 |
| 1629148_a_CG9776        | 3R | 40546   | 82A3-82A4  | Dm.1464  | -0,177958 |
| 1638765_at_CG7818       | 2L | 34138   | 29A3-29A3  | Dm.351   | -0,159318 |
| 1626300_at_CG17068      | X  | 33024   | 19C1-19C1  | Dm.23176 | -0,166789 |
| 1641548_at_CG10289      | 3L | 38714   | 65A7-65A7  | Dm.862   | -0,162248 |
| 1624237_at_CG15099      | 2R | 37176   | 55F6-55F7  | Dm.28282 | -0,177064 |
| 1626696_at_E(z)         | 3L | 39203   | 67E5-67E5  | Dm.2823  | -0,177958 |
| 1641379_a_CG41099       | 3R | 3355072 |            | Dm.5502  | -0,17512  |
| 1641317_at_squ          | 2L | 2768920 | 36A10-36A1 | Dm.7018  | -0,169198 |
| 1635290_at_CG11418      | X  | 31081   | 1F4-1F4    | Dm.10897 | -0,17521  |
| 1623460_at_Aats-leu     | 3L | 38581   | 64C1-64C1  | Dm.1571  | -0,167994 |
| 1632471_at_CG12155      | X  | 31682   | 7B7-7B7    | Dm.95    | -0,17694  |
| 1641297_at_hyd          | 3R | 41181   | 85E5-85E5  | Dm.7365  | -0,182179 |
| 1627443_at_CG5941       | X  | 31536   | 5D2-5D2    | Dm.7753  | -0,171794 |
| 1637552_s_shep          | 3L | 38605   | 64C8-64C1  | Dm.20861 | -0,163198 |
| 1624849_at_Prosap       | 2R | 50225   | 50D3-50E1  | Dm.19025 | -0,181678 |
| 1628338_at_CG32756      | X  | 318193  | 5C10-5C10  | Dm.13013 | -0,161113 |
| 1628488_at_CG6051       | 3R | 43271   | 97E3-97E3  | Dm.2180  | -0,188271 |

|                        |    |         |            |          |           |
|------------------------|----|---------|------------|----------|-----------|
| 1627114_at CG3793      | 2L | 34928   | 35D4-35D4  | Dm.4558  | -0,163817 |
| 1626313_at crl         | X  | 44054   | 14F1-14F1  | Dm.1420  | -0,179437 |
| 1623602_a Ptp69D       | 3L | 39443   | 69D6-69E1  | Dm.945   | -0,171451 |
| 1630123_at CG3099      | X  | 31906   | 8F2-8F2    | Dm.17569 | -0,165925 |
| 1627354_at CG5835      | 3R | 42296   | 91F4-91F4  | Dm.4282  | -0,186843 |
| 1630324_at Il(2)k07824 | 2R | 36831   | 53C1-53C1  | Dm.11287 | -0,171429 |
| 1623758_at CG13123     | 2L | 34303   | 30D1-30D1  | Dm.12887 | -0,174541 |
| 1629716_a CG13284      | 2L | 35021   | 36B2-36B2  | Dm.33838 | 0,172051  |
| 1639947_s CG11166      | 2R | 35660   | 43B2-43B2  | Dm.7246  | -0,174162 |
| 1641403_at CG14967     | 3L | 38395   | 63B13-63B1 | Dm.20771 | -0,166711 |
| 1640157_at CG1678      | X  | 33121   | 20A1-20A1  | Dm.20679 | 0,143931  |
| 1630543_at CG5161      | 3L | 39769   | 72D9-72D9  | Dm.18901 | -0,176772 |
| 1626942_at CG9996      | 3R | 43008   | 96B20-96B2 | Dm.23682 | -0,176619 |
| 1623039_at CG3409      | 2R | 35578   | 42C5-42C6  | Dm.2070  | -0,192861 |
| 1627843_at CG12253     | 2L | 47730   | 32C1-32C1  | Dm.10633 | -0,172509 |
| 1640362_at CG14781     | X  | 31104   | 2B1-2B1    | Dm.4944  | -0,15968  |
| 1630823_at CG32210     | 3L | 40127   | 76B6-76B7  | Dm.30375 | -0,186555 |
| 1629111_at MED1        | 3L | 40403   | 78E1-78E1  | Dm.6444  | -0,180017 |
| 1625654_at GluRIIB     | 2L | 33789   | 25E6-25E6  | Dm.6941  | 0,170538  |
| 1624079_a Rab21        | X  | 3355163 |            | Dm.11159 | -0,175007 |
| 1623782_at SCAP        | 2R | 35529   | 42A8-42A8  | Dm.13206 | -0,169408 |
| 1629053_at CG8370      | 2R | 36761   | 52D11-52D1 | Dm.641   | -0,188001 |
| 1623473_at shark       | 2R | 44353   | 52F8-52F8  | Dm.6764  | -0,177173 |
| 1623777_s CG1358       | 2R | 35697   | 43E3-43E4  | Dm.7075  | -0,190845 |
| 1636273_at Dpit47      | 2R | 35565   | 42C3-42C3  | Dm.5395  | -0,181684 |
| 1629973_at CG6218      | 3R | 41863   | 88F1-88F1  | Dm.20190 | -0,170045 |
| 1627764_at CG6194      | 3R | 41868   | 88F1-88F1  | Dm.2122  | -0,164524 |
| 1633138_at CG32251     | 3L | 326205  | 64B1-64B1  | Dm.21144 | -0,172228 |
| 1632433_at CG17598     | X  | 33140   | 20C1-20C1  | Dm.238   | -0,181745 |
| 1626117_at CG5720      | 3R | 42897   | 95F11-95F1 | Dm.3011  | -0,179023 |
| 1641510_at Tor         | 2L | 47396   | 34A4-34A4  | Dm.1502  | -0,162399 |
| 1635530_at CG1249      | 3R | 40781   | 83E4-83E4  | Dm.9898  | -0,193802 |
| 1640421_at CG11811     | 3L | 39213   | 67E6-67E7  | Dm.6149  | -0,179165 |
| 1639527_at Klp31E      | 2L | 34422   | 31E1-31E1  | Dm.3297  | -0,184952 |
| 1628683_at CG6272      | 3L | 39243   | 68A6-68A6  | Dm.20675 | -0,196239 |
| 1624113_at CG7845      | 2R | 35536   | 42A9-42A9  | Dm.4409  | -0,174037 |
| 1641214_at CG9298      | 2L | 34197   | 29E3-29E4  | Dm.18211 | -0,162576 |
| 1625963_at CG1896      | 3R | 43738   | 100D2-100D | Dm.1393  | -0,193996 |
| 1641624_at CG31957     | 2L | 319046  | 24C8-24C8  | Dm.18349 | -0,181256 |
| 1634563_at CG3764      | 3L | 39902   | 73E2-73E3  | Dm.2243  | -0,184191 |
| 1632998_at D12         | 2L | 34172   | 29C4-29C4  | Dm.3524  | -0,180225 |
| 1635638_s tomosyn      | X  | 32217   | 11B6-11B7  | Dm.12987 | -0,174689 |
| 1634555_at CG11033     | 3R | 41090   | 85C3-85C4  | Dm.18939 | -0,174047 |
| 1627673_at sbr         | X  | 43944   | 9F4-9F5    | Dm.1645  | -0,168371 |
| 1625245_at CG3759      | 2L | 34258   | 30B2-30B3  | Dm.5988  | -0,191558 |
| 1630531_at RhoGAP93B   | 3R | 42496   | 93B10-93B1 | Dm.11758 | -0,207586 |
| 1636286_at CG7382      | 2L | 33772   | 25E5-25E5  | Dm.309   | -0,171186 |
| 1631872_at CG7755      | 2R | 36816   | 53A5-53A5  | Dm.21579 | 0,167823  |
| 1625855_at MED30       | 3L | 38078   | 61C8-61C8  | Dm.798   | -0,176927 |
| 1633515_s ago          | 3L | 38516   | 64A11-64A1 | Dm.2559  | -0,181504 |
| 1629795_at PTP-ER      | 2R | 37461   | 57F4-57F4  | Dm.3114  | -0,181315 |
| 1630721_s auxillin     | 3R | 40527   | 82A1-82A1  | Dm.9840  | -0,173415 |
| 1624533_s trx          | 3R | 41737   | 88B1-88B1  | Dm.6437  | -0,150185 |

|            |            |    |        |            |          |           |
|------------|------------|----|--------|------------|----------|-----------|
| 1624103_at | CG7246     | X  | 31833  | 8C4-8C4    | Dm.5351  | -0,154861 |
| 1641427_at | foi        | 3L | 38976  | 66D5-66D6  | Dm.2818  | -0,177259 |
| 1639367_a  | CG11508    | 2R | 35787  | 44B3-44B3  | Dm.11519 | -0,164325 |
| 1634492_s  | CG7597     | 3L | 40385  | 78D4-78D5  | Dm.1943  | -0,172207 |
| 1639370_at | CG1239     | 3R | 40706  | 83C1-83C1  | Dm.3565  | -0,179218 |
| 1629943_at | CG7112     | 3L | 38945  | 66C8-66C8  | Dm.13603 | -0,182075 |
| 1623641_at | CG32856    | 3R | 318251 | 89A8-89A8  | Dm.6089  | -0,1905   |
| 1624478_at | Roc1a      | X  | 31014  | 1B13-1B13  | Dm.31031 | -0,174456 |
| 1635214_at | mus308     | 3R | 41571  | 87C6-87C6  | Dm.23677 | -0,172727 |
| 1632580_at | CG12765    | 2R | 36463  | 49F11-49F1 | Dm.5033  | -0,15725  |
| 1637611_at | Yippee     | X  | 32295  | 11F1-11F1  | Dm.3461  | -0,165499 |
| 1633779_s  | loj        | 3L | 38698  | 65A6-65A6  | Dm.1486  | -0,183013 |
| 1637307_at | CG31694    | 2L | 33489  | 23B7-23B8  | Dm.11419 | -0,167188 |
| 1636297_at | CG3173     | 2R | 37840  | 60B5-60B5  | Dm.7814  | -0,161706 |
| 1625632_at | robl       | 2R | 36963  | 54B16-54B1 | Dm.2693  | -0,209182 |
| 1633730_at | dik        | X  | 32787  | 16F6-16F6  | Dm.2841  | -0,166683 |
| 1635123_at | glu        | 2L | 35001  | 36A12-36A  | Dm.3063  | -0,168619 |
| 1635973_at | CG11196    | 2R | 35763  | 44A2-44A2  | Dm.515   | 0,183779  |
| 1628358_at | Tob        | X  | 32574  | 14A8-14A8  | Dm.11284 | -0,19144  |
| 1641653_at | WASp       | 3R | 43402  | 98E5-98E5  | Dm.6373  | -0,190119 |
| 1631249_at | CG12713    | 3L | 39724  | 72A2-72A2  | Dm.20089 | -0,164573 |
| 1625427_at | CG12241    | 3R | 41834  | 88E3-88E3  | Dm.4143  | -0,169083 |
| 1628155_at | klar       | 3L | 38067  | 61C1-61C3  | Dm.2787  | -0,196371 |
| 1635649_at | CG8038     | 3L | 38889  | 66A21-66A  | Dm.31180 | -0,17033  |
| 1631586_at | CG15250    | X  | 31929  | 9A3-9A3    | Dm.26597 | 0,161537  |
| 1631979_at | MICAL-like | 3L | 39475  | 69F5-69F5  | Dm.4420  | -0,176856 |
| 1624750_at | CG8545     | 2R | 36365  | 49A7-49A7  | Dm.2211  | -0,161819 |
| 1637536_at | CG14303    | 3R | 42236  | 91B7-91B8  | Dm.13713 | -0,147672 |
| 1633055_at | CG10874    | 2L | 33394  | 22D1-22D1  | Dm.6070  | -0,16995  |
| 1636517_at | gprs       | 2R | 36862  | 53C13-53C1 | Dm.12423 | 0,173909  |
| 1640110_at | CG11122    | X  | 32046  | 10A4-10A6  | Dm.10786 | -0,160925 |
| 1637487_at | Dcp-1      | 2R | 37729  | 59E3-59E3  | Dm.4849  | -0,17051  |
| 1636574_s  | CG33056    | 3L | 326246 | 78C2-78C2  | Dm.1027  | -0,189071 |
| 1623212_s  | tamo       | 2R | 37864  | 60B11-60B1 | Dm.6387  | -0,186748 |
| 1630825_at | CG5798     | 3R | 42509  | 93C1-93C1  | Dm.11085 | -0,164541 |
| 1633144_at | jbug       | 2R | 43997  | 59A3-59A3  | Dm.14398 | -0,186538 |
| 1627667_at | CG16753    | 3L | 38365  | 63A5-63A5  | Dm.829   | -0,186997 |
| 1637469_at | pen-2      | 2R | 251430 | 55C2-55C2  | Dm.14392 | -0,196758 |
| 1628685_at | CG12029    | 3L | 38436  | 63E5-63E6  | Dm.27049 | 0,179152  |
| 1625204_a  | CG8475     | 2L | 34114  | 28F1-28F1  | Dm.4977  | -0,167154 |
| 1634013_at | mRpL17     | 3L | 38046  | 61B3-61B3  | Dm.14476 | -0,185604 |
| 1630438_at | CG32409    | 3L | 318016 | 64F4-64F4  | Dm.11429 | -0,169502 |
| 1635254_at | CG17662    | 2R | 37738  | 59F4-59F4  | Dm.31010 | 0,180114  |
| 1631554_at | CG11473    | X  | 31476  | 5A8-5A9    | Dm.5372  | -0,180147 |
| 1634453_at | g          | X  | 44819  | 12B4-12B4  | Dm.1817  | -0,155685 |
| 1627461_at | bsf        | 2L | 35100  | 36F5-36F5  | Dm.453   | -0,174047 |
| 1639768_at | CG2813     | 2L | 33237  | 21E2-21E2  | Dm.250   | -0,182334 |
| 1635104_s  | CG33936    | 3R | 41114  | 85D11-85D  | Dm.21258 | -0,179869 |
| 1641346_at | CG12124    | X  | 31869  | 8D2-8D2    | Dm.17578 | -0,16086  |
| 1623374_a  | Fim        | X  | 32721  | 15F8-16A1  | Dm.2171  | -0,189791 |
| 1625144_at | CG6758     | 2R | 37532  | 58C5-58C5  | Dm.11634 | -0,162519 |
| 1640146_at | CG33116    | 2L | 326259 | 37F1-37F1  | Dm.1955  | -0,176308 |
| 1624705_a  | fax        | 3L | 39826  | 72E5-72F1  | Dm.6723  | -0,172431 |



|                         |    |         |            |          |           |
|-------------------------|----|---------|------------|----------|-----------|
| 1634942_ai CG5114       | 3L | 39624   | 71A4-71A4  | Dm.961   | -0,169294 |
| 1623043_s. CG7852       | 3L | 38178   | 62A3-62A3  | Dm.11783 | -0,180637 |
| 1628824_s. l(1)G0060    | X  | 31496   | 5B4-5B6    | Dm.4385  | -0,179499 |
| 1626898_ai CG4751       | 2L | 34551   | 32D4-32D5  | Dm.4426  | -0,174751 |
| 1624747_ai Ts           | 2L | 33499   | 23C3-23C3  | Dm.30804 | -0,136596 |
| 1640456_ai CG15439      | 2L | 33651   | 24F3-24F3  | Dm.2115  | -0,17832  |
| 1640441_ai Mi-2         | 3L | 40170   | 76D3-76D4  | Dm.28317 | -0,17704  |
| 1641247_ai Ranbp21      | X  | 32970   | 18D12-18D1 | Dm.3479  | -0,188779 |
| 1626930_ai CG6230       | 2L | 34546   | 32D4-32D4  | Dm.18494 | -0,174211 |
| 1627326_a. CG6860       | 2L | 35041   | 36C7-36C7  | Dm.444   | -0,175098 |
| 1640263_ai CG13993      | 2L | 33857   | 26B4-26B4  | Dm.30771 | -0,199512 |
| 1640497_ai mib2         | 2L | 35170   | 37B10-37B1 | Dm.11412 | -0,173955 |
| 1634592_ai ECSIT        | 3R | 40732   | 83C5-83C5  | Dm.3065  | -0,158262 |
| 1640914_ai CG8838       | 2L | 33551   | 23E5-23E5  | Dm.7989  | 0,172825  |
| 1624257_ai CG18259      | X  | 32866   | 17D5-17D5  | Dm.19742 | -0,166327 |
| 1635302_ai mus101       | X  | 48309   | 12B4-12B4  | Dm.21710 | -0,160142 |
| 1632413_ai CG5343       | 2L | 34429   | 31E1-31E1  | Dm.390   | -0,175285 |
| 1631525_ai l(2)k10201   | 2R | 48373   | 45D3-45D3  | Dm.27473 | -0,168994 |
| 1627868_ai Prat         | 3R | 40935   | 84E5-84E5  | Dm.9919  | -0,168845 |
| 1639093_s. Tom70        | 2L | 34618   | 33B9-33B1  | Dm.11000 | -0,182924 |
| 1636745_ai Art4         | 3R | 41219   | 85F4-85F4  | Dm.17037 | -0,172575 |
| 1623549_ai CG1973       | 3R | 43508   | 99B10-99B1 | Dm.6905  | -0,169147 |
| 1624649_a. rogd         | 3L | 39917   | 73E5-73E5  | Dm.4011  | -0,178016 |
| 1640818_ai pkaap        | 2L | 34957   | 35F1-35F1  | Dm.8778  | -0,178895 |
| 1636337_s. pgant6       | 3L | 38346   | 62F4-62F4  | Dm.3519  | -0,179395 |
| 1634509_s. fwd          | 3L | 45374   | 61C1-61C1  | Dm.1632  | -0,17794  |
| 1633060_ai Cyp6g2       | 2R | 36317   | 48E7-48E7  | Dm.18513 | 0,173988  |
| 1629101_a. CG10395      | 2R | 35490   | 41E5-41E5  | Dm.489   | -0,169699 |
| 1635186_ai Syx13        | 3L | 39485   | 69F6-69F6  | Dm.1482  | -0,17045  |
| 1623952_a. Su(z)12      | 3L | 48071   | 76D4-76D4  | Dm.1941  | -0,168734 |
| 1638844_s. CG3714       | 2L | 33626   | 24D8-24D8  | Dm.11340 | -0,176897 |
| 1630981_ai CG2698       | 3R | 40945   | 84E8-84E8  | Dm.1096  | -0,176388 |
| 1638653_a. CG9932       | 2L | 34701   | 34A4-34A5  | Dm.31451 | -0,192514 |
| 1633731_ai wee          | 2L | 33965   | 27C4-27C4  | Dm.3106  | -0,162411 |
| 1628969_s. CG8485       | 2R | 36579   | 50E4-50E4  | Dm.6604  | -0,168952 |
| 1641396_a. CG7766       | X  | 31839   | 8C8-8C9    | Dm.4277  | -0,163136 |
| 1632512_ai CG11820      | 3R | 43004   | 96B19-96B1 | Dm.2031  | -0,176581 |
| 1625819_ai sno          | X  | 32273   | 11E3-11E3  | Dm.3794  | -0,165999 |
| 1623090_ai CG30390      | 2R | 37429   | 57D8-57D8  | Dm.15748 | -0,176324 |
| 1635568_ai CG10080      | 2R | 37462   | 57F4-57F5  | Dm.11761 | -0,165416 |
| 1630859_s. Chro         | 3L | 40508   | 80B1-80B2  | Dm.6422  | -0,177083 |
| 1629133_ai CG3815       | X  | 31571   | 5E6-5E7    | Dm.2312  | -0,166774 |
| 1638520_ai nudE         | 3L | 39169   | 67D1-67D1  | Dm.6458  | -0,178102 |
| 1629271_ai CG10444      | 2R | 37294   | 56F11-56F1 | Dm.11252 | -0,180716 |
| 1633032_s. CG8177       | 3L | 39147   | 67C7-67C8  | Dm.3977  | -0,160546 |
| 1622899_ai Rad9         | 3L | 40054   | 75E2-75E3  | Dm.1964  | -0,170371 |
| 1625244_ai CG15433      | 2L | 33649   | 24F2-24F2  | Dm.12505 | -0,15864  |
| 1623875_ai CG3434       | 3L | 39098   | 67B8-67B8  | Dm.910   | -0,159332 |
| 1628427_a. Rab40        | X  | 32195   | 11A11-11A1 | Dm.148   | -0,148238 |
| 1632931_ai cta          | 2L | 3355131 |            | Dm.2855  | -0,167193 |
| 1641438_ai DNAPol-delta | 3L | 39746   | 72C1-72C1  | Dm.2838  | -0,151018 |
| 1622983_a. Nup154       | 2L | 34527   | 32C1-32C1  | Dm.404   | -0,181099 |
| 1627789_ai CG11444      | X  | 31388   | 4C7-4C7    | Dm.3765  | -0,187393 |

|                        |    |         |            |          |           |
|------------------------|----|---------|------------|----------|-----------|
| 1630683_ai Patr-1      | 3R | 42058   | 89E10-89E1 | Dm.1227  | -0,174691 |
| 1638257_ai CG2931      | 3R | 40673   | 83B2-83B2  | Dm.1071  | -0,17697  |
| 1634824_a. CG1677      | X  | 31662   | 7A8-7B1    | Dm.33530 | -0,180798 |
| 1639806_ai chb         | 3L | 43901   | 78C1-78C2  | Dm.1413  | -0,176358 |
| 1624139_ai PhKgamma    | X  | 32120   | 10D5-10D5  | Dm.2615  | -0,174896 |
| 1631048_ai CG14434     | X  | 31632   | 6D7-6D7    | Dm.13434 | -0,163775 |
| 1633915_ai RnpS1       | 3R | 41147   | 85D24-85D2 | Dm.23312 | -0,161062 |
| 1623185_s. jar         | 3R | 42889   | 95F6-95F8  | Dm.7884  | -0,186028 |
| 1629248_ai yrt         | 3R | 41656   | 87E11-87E1 | Dm.1183  | -0,164831 |
| 1638736_ai CG11458     | 3L | 50110   | 77F4-77F4  | Dm.21436 | -0,174153 |
| 1626553_ai CG10376     | 2L | 35126   | 37A1-37A1  | Dm.4386  | -0,166538 |
| 1641579_ai mRpS26      | 3L | 40001   | 75B9-75B9  | Dm.6602  | -0,177198 |
| 1626763_a. veli        | 3R | 43003   | 96B19-96B1 | Dm.13950 | -0,182    |
| 1637308_ai CG11417     | X  | 31083   | 1F4-1F4    | Dm.11    | -0,169045 |
| 1631013_ai mbc         | 3R | 42817   | 95B5-95B7  | Dm.3480  | -0,160879 |
| 1632261_ai CG32732     | X  | 31638   | 6E3-6E4    | Dm.7994  | -0,154725 |
| 1637084_ai CG14883     | 3R | 41997   | 89B17-89B1 | Dm.16812 | -0,167572 |
| 1626025_ai CG34267     | 3L | 5740365 |            | Dm.34296 | 0,173022  |
| 1640753_ai CG41124     | 3R | 3355105 |            | Dm.29383 | 0,173997  |
| 1629246_ai CG12219     | X  | 31572   | 5E7-5E7    | Dm.6     | -0,160595 |
| 1631595_ai CG13393     | 2L | 34159   | 29B4-29B4  | Dm.30817 | -0,185517 |
| 1626271_ai CG9634      | X  | 32660   | 15A3-15A5  | Dm.7732  | -0,146305 |
| 1634193_ai CG13142     | 2L | 34434   | 31E2-31E2  | Dm.23865 | -0,155836 |
| 1627651_a. loco        | 3R | 42672   | 94B6-94B8  | Dm.3231  | -0,164819 |
| 1641737_a. YT521-B     | 3L | 38420   | 63D2-63D2  | Dm.7409  | -0,158066 |
| 1639985_s. Chc         | X  | 32537   | 13F5-13F7  | Dm.3174  | -0,180663 |
| 1627403_s. Paf-AHalpha | X  | 32529   | 13E18-13E1 | Dm.1672  | -0,151415 |
| 1625243_a. E(bx)       | 3L | 44811   | 61B2-61B3  | Dm.1449  | -0,157011 |
| 1625556_ai ari-2       | 2R | 37542   | 58D1-58D2  | Dm.4783  | -0,165019 |
| 1632333_ai CG6108      | 2L | 34733   | 34B3-34B4  | Dm.23525 | 0,162843  |
| 1633394_a. CG13900     | 3L | 38093   | 61D2-61D2  | Dm.7679  | -0,178032 |
| 1641321_a. CG5284      | 3L | 39759   | 72D5-72D5  | Dm.11624 | -0,155928 |
| 1641196_ai Pnn         | 3R | 41185   | 85E6-85E6  | Dm.6024  | -0,156026 |
| 1633784_ai CG8379      | 3R | 41060   | 85B2-85B2  | Dm.2106  | -0,178412 |
| 1639061_ai enok        | 2R | 37859   | 60B10-60B1 | Dm.766   | -0,157814 |
| 1636742_ai nord        | 2R | 37882   | 60C3-60C4  | Dm.5164  | -0,167659 |
| 1623343_ai CG4049      | 2R | 37860   | 60B10-60B1 | Dm.15012 | -0,160159 |
| 1633691_ai CG32262     | 3L | 38445   | 63F1-63F1  | Dm.2278  | -0,148871 |
| 1630717_s. cg          | 2R | 36571   | 50E1-50E1  | Dm.2240  | -0,149865 |
| 1627470_ai phl         | X  | 31221   | 3A1-3A1    | Dm.39    | -0,179567 |
| 1636887_s. CG11247     | 3L | 40414   | 78E5-78E5  | Dm.1044  | -0,173529 |
| 1626299_ai yl          | X  | 32367   | 12E3-12E3  | Dm.2917  | -0,161418 |
| 1638283_ai CG9799      | 3R | 41647   | 87E8-87E8  | Dm.1181  | -0,152318 |
| 1628175_ai CG6325      | 3R | 41268   | 86B4-86B4  | Dm.3798  | -0,159199 |
| 1633019_a. Spf45       | 2L | 3355114 |            | Dm.7003  | -0,169291 |
| 1641223_ai CG4933      | 3L | 39811   | 72E2-72E2  | Dm.31123 | -0,170399 |
| 1636182_a. CG10948     | 3L | 39459   | 69E6-69E6  | Dm.6029  | -0,142598 |
| 1637442_ai ttv         | 2R | 36614   | 51A6-51B4  | Dm.2966  | -0,15851  |
| 1641329_ai CG34422     | X  | 32877   | 17E1-17E1  | Dm.214   | -0,162627 |
| 1627244_ai CG18870     | 2R | 59218   | 57F4-57F4  | Dm.10711 | -0,161871 |
| 1641345_ai CG3808      | 3L | 40074   | 75F2-75F2  | Dm.20111 | -0,15322  |
| 1631535_ai Vinc        | X  | 31201   | 2E2-2E3    | Dm.32    | -0,163019 |
| 1624320_ai mei-9       | X  | 31373   | 4B6-4B6    | Dm.1684  | -0,156178 |

|            |               |    |         |             |          |           |
|------------|---------------|----|---------|-------------|----------|-----------|
| 1628920_at | CG12237       | X  | 32967   | 18D11-18D1  | Dm.3567  | -0,164097 |
| 1630358_at | CG2162        | 3L | 38360   | 63A3-63A3   | Dm.1490  | -0,155284 |
| 1625444_at | CG13773       | 2L | 33963   | 27C4-27C4   | Dm.11997 | -0,155904 |
| 1631308_at | CG10737       | 2R | 37202   | 56C1-56C1   | Dm.14706 | -0,196362 |
| 1625839_at | X11Lbeta      | X  | 31997   | 9E1-9E1     | Dm.22750 | -0,172198 |
| 1633415_at | dpr18         | X  | 32572   | 14A6-14A7   | Dm.17381 | -0,162705 |
| 1633023_at | Acp70A        | 3L | 39494   | 70A4-70A4   | Dm.2898  | 0,157349  |
| 1625481_a. | retn          | 2R | 45976   | 59F5-59F5   | Dm.20640 | -0,179996 |
| 1639813_at | CG11008       | 3L | 39457   | 69E4-69E5   | Dm.15343 | 0,170296  |
| 1624008_at | elF2B-epsilon | X  | 31156   | 2B16-2B16   | Dm.3467  | -0,13867  |
| 1640589_at | gek           | 2R | 37858   | 60B9-60B1C  | Dm.4506  | -0,170791 |
| 1635377_at | CG13344       | 2R | 36541   | 50C6-50C6   | Dm.610   | -0,152638 |
| 1630078_a. | CG32000       | 4  | 317815  | 102A6-102A7 | Dm.20862 | -0,175947 |
| 1639159_at | CG4069        | 3L | 39437   | 69C6-69C6   | Dm.7287  | -0,145148 |
| 1624963_at | CG17802       | 3R | 42143   | 90C5-90C5   | Dm.12904 | -0,160598 |
| 1623388_at | CG15861       | 2R | 37990   | 60E8-60E8   | Dm.7976  | -0,166077 |
| 1630530_at | CG9296        | 2L | 34196   | 29E3-29E3   | Dm.6187  | -0,162598 |
| 1638189_s. | S             | 2L | 33281   | 21E4-21E4   | Dm.251   | -0,170221 |
| 1624029_at | CG3608        | 2R | 37938   | 60D9-60D9   | Dm.10995 | -0,161418 |
| 1636333_a. | mthl2         | 3L | 38636   | 64D6-64D6   | Dm.12868 | -0,166379 |
| 1635187_s. | CG1646        | 3R | 43399   | 98E5-98E5   | Dm.31288 | -0,148842 |
| 1626180_at | Gmer          | 2R | 37638   | 59B4-59B4   | Dm.739   | -0,149051 |
| 1629023_s. | CG40191       | 2R | 3354930 |             | Dm.7153  | -0,154708 |
| 1625795_a. | CG3394        | 2R | 37887   | 60C6-60C6   | Dm.7883  | -0,126709 |
| 1634072_s. | Hmgs          | 2R | 44154   | 53C1-53C1   | Dm.7717  | -0,158924 |
| 1624848_at | Prp18         | 3R | 42285   | 91E4-91E4   | Dm.23329 | -0,150684 |
| 1632475_at | msn           | 3L | 44030   | 62E6-62E7   | Dm.1870  | -0,150343 |
| 1623015_at | CG7671        | 3R | 42209   | 91A3-91A3   | Dm.20212 | -0,135417 |
| 1639057_at | mRpS31        | 3L | 39749   | 72C2-72C2   | Dm.20090 | -0,128037 |
| 1629922_at | CG11409       | X  | 31078   | 1F3-1F3     | Dm.2029  | 0,160117  |
| 1627723_at | CG14701       | 3R | 41352   | 86D8-86D8   | Dm.34077 | -0,181641 |
| 1630537_a. | Dap160        | 2L | 35378   | 39A4-39A4   | Dm.2093  | -0,163658 |
| 1637327_at | CG11376       | 2L | 33165   | 21B1-21B2   | Dm.12212 | -0,16693  |
| 1625723_at | CG14710       | 3R | 41393   | 86E13-86E1  | Dm.20173 | -0,154687 |
| 1623254_s. | CG31531       | 3R | 40583   | 82D1-82D2   | Dm.11428 | -0,169668 |
| 1640826_at | CG3947        | 3L | 40293   | 77E6-77E6   | Dm.31216 | -0,153445 |
| 1623324_at | lin           | 2R | 45325   | 44F6-44F7   | Dm.1802  | -0,151836 |
| 1633338_at | mRpS23        | 2L | 318977  | 34D6-34D6   | Dm.30836 | -0,170918 |
| 1625030_at | CG6751        | 2R | 36150   | 47C5-47C5   | Dm.30901 | -0,147109 |
| 1625519_at | CG6453        | 2L | 35056   | 36C10-36C1  | Dm.447   | -0,180806 |
| 1628216_at | ppan          | 3R | 42502   | 93B13-93B1  | Dm.3008  | -0,164546 |
| 1626918_at | CG13879       | 3L | 38044   | 61B3-61B3   | Dm.27030 | -0,164016 |
| 1633387_at | bves          | X  | 33083   | 19E7-19E7   | Dm.7881  | -0,155544 |
| 1625814_at | CG8230        | 2R | 35897   | 44F9-44F10  | Dm.536   | -0,182652 |
| 1629020_s. | arm           | X  | 31151   | 2B14-2B14   | Dm.4782  | -0,180437 |
| 1630110_at | CG12935       | 2R | 36134   | 47C1-47C1   | Dm.6706  | -0,155779 |
| 1631907_at | CG6038        | 3L | 39321   | 68D2-68D3   | Dm.935   | -0,17037  |
| 1626208_at | Exp6          | X  | 47141   | 1B4-1B4     | Dm.1770  | -0,149651 |
| 1625866_at | Lcp65Aa       | 3L | 38709   | 65A6-65A6   | Dm.27065 | 0,17094   |
| 1641673_at | CG8378        | 2R | 36299   | 48E2-48E2   | Dm.572   | -0,147078 |
| 1627043_at | CG4674        | 3R | 41320   | 86C7-86C7   | Dm.31243 | -0,155889 |
| 1626968_at | CG7207        | 3L | 38928   | 66C4-66C5   | Dm.3152  | -0,160272 |
| 1640143_at | CG10463       | 2L | 35264   | 38A2-38A2   | Dm.13522 | -0,16032  |

|                     |    |         |             |             |           |
|---------------------|----|---------|-------------|-------------|-----------|
| 1628763_ai Ptpmeg   | 3L | 38059   | 61C1-61C1   | Dm.5654     | -0,154921 |
| 1638175_ai mst      | X  | 33119   | 20A1-20A1   | Dm.2605     | -0,166555 |
| 1640417_a. Pkn      | 2R | 35950   | 45C1-45C1   | Dm.7964     | -0,160947 |
| 1638009_s. CG9399   | 3R | 41157   | 85D25-85D25 | Dm.5977     | -0,172165 |
| 1635365_ai CG5198   | 2L | 34432   | 31E2-31E2   | Dm.391      | -0,166694 |
| 1632466_ai CG9243   | 2L | 35387   | 39A7-39A7   | Dm.30865    | -0,171977 |
| 1626781_ai Pp2B-14D | X  | 32624   | 14E1-14E3   | Dm.33340    | -0,160763 |
| 1630887_a. CG14998  | 3L | 38491   | 64A7-64A7   | Dm.14813    | -0,166766 |
| 1623189_ai slik     | 2R | 37893   | 60C7-60C8   | Dm.10858    | -0,18361  |
| 1627409_ai CG15727  | X  | 32215   | 11B5-11B5   | Dm.5327     | -0,157385 |
| 1625332_ai CG14764  | 2R | 35749   | 43F4-43F7   | Dm.2038     | -0,166447 |
| 1625004_ai CG18811  | 3L | 59172   | 75D5-75D6   | Dm.13182    | -0,165644 |
| 1635526_ai CG15390  | 2L | 33422   | 22E1-22E1   | Dm.4935     | -0,13745  |
| 1626972_ai CG11874  | 3R | 43436   | 98F10-98F10 | Dm.1365     | -0,142534 |
| 1632652_s. CG40100  | 2R | 3355045 |             | Dm.29348    | -0,179247 |
| 1625387_s. torp4a   | X  | 31399   | 4C11-4C11   | Dm.19668    | -0,191775 |
| 1635714_s. fdl      | 2R | 250735  | 49A9-49A10  | Dm.3735     | -0,177934 |
| 1625183_ai smi35A   | 2L | 34831   | 35A1-35A2   | Dm.2597     | -0,178582 |
| 1634683_ai Mad      | 2L | 33529   | 23D3-23D3   | Dm.7367     | -0,165644 |
| 1634541_a. CG3271   | 2R | 35570   | 42C3-42C3   | Dm.495      | -0,156412 |
| 1634307_ai Graf     | X  | 32522   | 13E14-13E14 | Dm.10748    | -0,155032 |
| 1623424_a. babo     | 2R | 35900   | 44F11-44F11 | Dm.5376     | -0,152372 |
| 1629733_ai Lim1     | X  | 31813   | 8A5-8B2     | Dm.3025     | -0,164212 |
| 1641309_s. lswi     | 2R | 36390   | 49B10-49B10 | Dm.2581     | -0,148742 |
| 1633850_ai CG18156  | 3L | 38762   | 65D5-65D5   | Dm.6087     | -0,160328 |
| 1631101_ai CG6480   | 3L | 40228   | 77B1-77B1   | Dm.15115    | -0,162299 |
| 1635634_ai CG7172   | 3L | 40395   | 78D6-78D6   | Dm.4953     | -0,175006 |
| 1635347_a. CG8557   | X  | 32729   | 16A5-16B1   | Dm.1952     | -0,179484 |
| 1637265_ai CG7550   | 3L | 38901   | 66B7-66B7   | Dm.15495    | -0,148322 |
| 1641484_a. otu      | X  | 31789   | 7F1-7F1     | Dm.7029     | -0,170229 |
| 1631575_ai U2A      | 2R | 35713   | 43E9-43E9   | Dm.14227    | -0,149769 |
| 1640271_s. plexA    | 4  | 43832   | 102D1-102D1 | Dm.1408     | -0,16376  |
| 1638998_ai cul-5    | 3R | 43434   | 98F6-98F6   | Dm.5893     | -0,151515 |
| 1623453_ai CG10447  | 2L | 35261   | 38A2-38A2   | Dm.6186     | -0,160379 |
| 1625732_ai dpr8     | X  | 32387   | 12E8-12E10  | Dm.164      | -0,163166 |
| 1628714_ai CG12129  | 2R | 36044   | 46D7-46D7   | Dm.11398    | -0,165352 |
| 1640230_ai CG34228  | 2R | 5740377 |             | Dm.33405    | -0,16152  |
| 1628636_a. CG11943  | X  | 33002   | 18F4-18F4   | Dm.11611    | -0,159516 |
| 1627576_ai CG8247   | 2R | 35889   | 44F7-44F7   | Dm.5947     | -0,15541  |
| 1633204_a. CG10971  | 3L | 39450   | 69E2-69E2   | Dm.11739    | -0,156722 |
| 1639576_ai Klp68D   | 3L | 39332   | 68D6-68E1   | Dm.2788     | -0,144993 |
| 1629997_ai CG13858  | 3R | 50058   | 94A5-94A5   | Dm.27952    | 0,164887  |
| 1634822_a. CG10344  | 2R | 37565   | 58E1-58E1   | Dm.20177, l | -0,150817 |
| 1630918_ai a6       | X  | 31127   | 2B7-2B7     | Dm.2135     | -0,149747 |
| 1632844_s. CG12004  | 3L | 38185   | 62A6-62A6   | Dm.813      | -0,146138 |
| 1624364_ai CG4849   | 3R | 43358   | 98B6-98B6   | Dm.28203    | -0,146604 |
| 1623656_s. CG1109   | 3R | 40698   | 83B8-83B8   | Dm.4508     | -0,14996  |
| 1634560_ai 140up    | 3R | 41720   | 88A9-88A9   | Dm.10056    | -0,171737 |
| 1629942_ai CG5292   | 3R | 42079   | 89F1-89F1   | Dm.5476     | -0,162229 |
| 1627111_ai NHP2     | 3L | 44005   | 70F6-70F6   | Dm.7234     | -0,175047 |
| 1628292_s. HLH106   | 3L | 40155   | 76C5-76C5   | Dm.7945     | -0,158996 |
| 1634849_ai CG9247   | 2L | 35385   | 39A6-39A7   | Dm.30864    | -0,159027 |
| 1636106_s. alt      | 3R | 42127   | 90C1-90C1   | Dm.7290     | -0,164706 |

|                     |    |         |            |          |           |
|---------------------|----|---------|------------|----------|-----------|
| 1633190_ai CG31278  | 3R | 41282   | 86C4-86C4  | Dm.17011 | -0,150609 |
| 1635299_ai Rev1     | 3L | 38079   | 61C8-61C8  | Dm.2203  | -0,175631 |
| 1635706_ai mRpL20   | 3L | 39477   | 69F5-69F5  | Dm.2752  | -0,160265 |
| 1627421_ai CG18292  | X  | 32050   | 10A6-10A7  | Dm.2023  | -0,156736 |
| 1633092_ai cup      | 2L | 33934   | 26F5-26F6  | Dm.333   | -0,165401 |
| 1635819_ai sty      | 3L | 38424   | 63D2-63D3  | Dm.2561  | -0,172767 |
| 1634526_a qua       | 2L | 35058   | 36C10-36C1 | Dm.2984  | -0,157741 |
| 1634293_ai Alg-2    | 3R | 3355106 |            | Dm.5985  | -0,142879 |
| 1631832_ai Mlc-c    | X  | 31474   | 5A8-5A8    | Dm.3980  | -0,160847 |
| 1638882_ai ry       | 3R | 41605   | 87D9-87D9  | Dm.2436  | -0,188347 |
| 1624138_ai CG5800   | X  | 32742   | 16B10-16B1 | Dm.13464 | -0,167152 |
| 1629638_ai Als      | 2R | 36588   | 50E6-50E6  | Dm.23922 | 0,165845  |
| 1630696_ai CG12972  | 3L | 40363   | 78C8-78C8  | Dm.24788 | -0,149897 |
| 1637720_ai CG6856   | 3L | 40052   | 75E2-75E2  | Dm.6165  | -0,147361 |
| 1635035_ai CG9384   | 3L | 39608   | 70F4-70F4  | Dm.31156 | -0,139945 |
| 1632567_ai CG31342  | 3R | 41592   | 87D7-87D7  | Dm.11941 | -0,154098 |
| 1626175_ai CG11534  | 3L | 39381   | 68F5-68F5  | Dm.4305  | -0,158319 |
| 1639759_s vlc       | 2R | 46078   | 41F8-41F8  | Dm.1631  | -0,151074 |
| 1638318_ai CG7544   | 2R | 36680   | 51E2-51E2  | Dm.634   | -0,141444 |
| 1638511_ai Aats-trp | 3R | 45399   | 85D7-85D7  | Dm.3001  | -0,166404 |
| 1623722_ai nonA-I   | 3R | 42026   | 89D6-89D6  | Dm.1225  | -0,15215  |
| 1623889_ai CG1317   | 3L | 38300   | 62D7-62D7  | Dm.4190  | -0,150041 |
| 1626774_s robo      | 2R | 37603   | 59A2-59A3  | Dm.7485  | -0,152734 |
| 1635027_ai CG31800  | 2L | 318947  | 37B10-37B1 | Dm.17964 | -0,161514 |
| 1626833_ai CG11839  | 3R | 43006   | 96B20-96B2 | Dm.16509 | -0,162704 |
| 1636928_s CG1486    | X  | 33108   | 19F4-19F4  | Dm.2324  | -0,175713 |
| 1634037_s Ssdp      | 3R | 42177   | 90F6-90F7  | Dm.13397 | -0,154963 |
| 1627267_ai MESR3    | 2L | 35116   | 36F7-36F9  | Dm.2155  | -0,177279 |
| 1630216_ai drosha   | 2R | 35747   | 43F2-43F3  | Dm.4482  | -0,172951 |
| 1636935_ai CG2219   | 4  | 43771   | 102B1-102E | Dm.13309 | -0,159154 |
| 1637612_ai CG6017   | 3L | 39747   | 72C1-72C1  | Dm.11460 | -0,157195 |
| 1633746_s a         | 2R | 43852   | 58C1-58C5  | Dm.33421 | -0,151067 |
| 1628167_s CG6597    | 3L | 40231   | 77B2-77B2  | Dm.11689 | -0,157831 |
| 1636870_ai CG9793   | 3R | 41041   | 85A9-85A9  | Dm.31299 | -0,155361 |
| 1635376_ai CG9086   | X  | 32687   | 15C5-15C6  | Dm.7014  | -0,159554 |
| 1628306_ai trc      | 3L | 40165   | 76D1-76D1  | Dm.2518  | -0,151317 |
| 1639612_s CG4323    | 3R | 42423   | 92E12-92E1 | Dm.11879 | 0,149433  |
| 1635051_a Herp      | 2L | 34065   | 28C4-28C4  | Dm.6736  | -0,163644 |
| 1623733_ai Nmd3     | X  | 31195   | 2E1-2E1    | Dm.7201  | -0,14886  |
| 1623365_ai Bgb      | 3L | 38198   | 62A9-62A9  | Dm.4101  | -0,162668 |
| 1630101_s Smr       | X  | 32225   | 11B10-11B1 | Dm.7194  | -0,147159 |
| 1632003_a Ptp99A    | 3R | 43469   | 99A11-99B1 | Dm.12683 | -0,16954  |
| 1634411_ai CG6506   | X  | 32766   | 16E1-16E1  | Dm.11571 | -0,153545 |
| 1628198_ai okr      | 2L | 33507   | 23C4-23C4  | Dm.19774 | -0,146502 |
| 1630824_a CG33145   | 2R | 36279   | 48D5-48D5  | Dm.6148  | -0,159102 |
| 1640198_ai CG5664   | 3L | 40371   | 78D2-78D2  | Dm.1037  | -0,154113 |
| 1631381_ai Uba2     | 3L | 44496   | 66B7-66B7  | Dm.6538  | -0,163422 |
| 1636706_ai Myd88    | 2R | 35956   | 45C5-45C5  | Dm.2113  | -0,152837 |
| 1630622_ai Sirt6    | 3R | 41254   | 86A3-86A3  | Dm.24872 | -0,141456 |
| 1625142_s CG7377    | 3L | 2768978 | 68C13-68C1 | Dm.29146 | 0,168742  |
| 1639633_ai CG8272   | 2R | 35875   | 44F2-44F3  | Dm.534   | -0,149081 |
| 1640673_ai Noa36    | 3R | 43384   | 98D6-98D6  | Dm.7297  | -0,150907 |
| 1633054_ai CG14057  | 3L | 39915   | 73E5-73E5  | Dm.24015 | -0,160281 |

|            |            |    |         |            |          |           |
|------------|------------|----|---------|------------|----------|-----------|
| 1630140_at | CG14931    | 2L | 34588   | 33A1-33A1  | Dm.26793 | -0,160489 |
| 1625537_at | CG3655     | X  | 31056   | 1E1-1E1    | Dm.1956  | -0,151937 |
| 1638704_at | Kap3       | X  | 32071   | 10B3-10B3  | Dm.14732 | -0,150586 |
| 1636831_s. | brm        | 3L | 39744   | 72C1-72C1  | Dm.5356  | -0,153349 |
| 1641031_s. | jigr1      | 3R | 43093   | 96E6-96E6  | Dm.7493  | -0,157848 |
| 1640376_a. | CG30054    | 2R | 246420  | 49B9-49B9  | Dm.33112 | -0,13508  |
| 1638609_s. | MBD-R2     | 3R | 41498   | 87B7-87B8  | Dm.13212 | -0,155307 |
| 1636514_at | Tak1       | X  | 39659   | 19D2-19D2  | Dm.6425  | -0,165004 |
| 1636958_s. | l(2)k01209 | 2R | 36953   | 54B7-54B7  | Dm.10860 | -0,140614 |
| 1640054_at | D19A       | 3L | 38718   | 65A7-65A7  | Dm.2988  | -0,147691 |
| 1623826_at | CHIP       | 2L | 34433   | 31E2-31E2  | Dm.392   | -0,157318 |
| 1640231_a. | CG8908     | 2R | 37293   | 56F11-56F1 | Dm.26975 | 0,148226  |
| 1627383_at | asp        | 3R | 42946   | 96A19-96A  | Dm.7038  | -0,145142 |
| 1635342_at | CG10306    | 2R | 37475   | 57F8-57F8  | Dm.3730  | -0,164268 |
| 1640418_at | mor        | 3R | 41942   | 89A8-89A1  | Dm.2417  | -0,160505 |
| 1639984_at | raps       | 3R | 53569   | 98A8-98A8  | Dm.7372  | -0,166815 |
| 1631106_s. | Aats-ile   | 3L | 45785   | 79D4-79D4  | Dm.6892  | -0,163821 |
| 1627677_s. | CG10743    | 3L | 39524   | 70B4-70B4  | Dm.15315 | -0,147856 |
| 1630290_at | mld        | 3R | 2768685 | 96A9-96A9  | Dm.31276 | -0,150219 |
| 1634162_at | CG40198    | 3R | 3354922 |            | Dm.24163 | 0,138206  |
| 1632511_at | CG12862    | 2R | 36625   | 51B7-51B7  | Dm.16062 | 0,171132  |
| 1640619_at | CG7028     | 3L | 38032   | 61B2-61B2  | Dm.3161  | -0,152668 |
| 1625011_at | CG11206    | 2R | 37552   | 58D3-58D4  | Dm.12465 | -0,171051 |
| 1628774_a. | boi        | X  | 31229   | 3A3-3A3    | Dm.40    | -0,168064 |
| 1625344_at | fu12       | 2L | 34176   | 29C5-29D1  | Dm.356   | -0,172424 |
| 1628264_a. | RecQ5      | 3L | 39594   | 70E5-70E5  | Dm.4338  | -0,144871 |
| 1634867_at | CG13169    | 2R | 36326   | 48F1-48F1  | Dm.23913 | 0,151182  |
| 1629104_at | CG2258     | X  | 31729   | 7D6-7D6    | Dm.11529 | -0,150542 |
| 1627239_s. | CG17034    | 2R | 36488   | 50A5-50A8  | Dm.7647  | -0,139724 |
| 1634817_at | or         | 2R | 43943   | 60A14-60A  | Dm.3362  | -0,162729 |
| 1630055_a. | sec31      | 2R | 35877   | 44F3-44F3  | Dm.30896 | -0,166713 |
| 1625945_a. | CG1233     | 3L | 38063   | 61C1-61C1  | Dm.23271 | -0,146659 |
| 1632525_at | CG9925     | 3R | 41702   | 88A3-88A3  | Dm.1191  | -0,160894 |
| 1635314_at | maf-S      | 2R | 37336   | 57A8-57A8  | Dm.6801  | -0,170146 |
| 1625679_at | CG15386    | 2L | 50188   | 22D4-22D4  | Dm.18411 | -0,17899  |
| 1628755_at | Gfr        | 3R | 40981   | 84F10-84F1 | Dm.31298 | -0,160697 |
| 1633951_at | DDB1       | 3R | 41611   | 87D11-87D  | Dm.3215  | -0,159616 |
| 1634649_at | mys        | X  | 44885   | 7D5-7D5    | Dm.1814  | -0,174527 |
| 1641440_a. | CG4877     | 3L | 39821   | 72E4-72E4  | Dm.7165  | -0,168973 |
| 1624053_at | CG33967    | 3R | 41783   | 88D1-88D1  | Dm.16870 | 0,145231  |
| 1628025_at | CG13055    | 3L | 39779   | 72D10-72D  | Dm.27863 | 0,149317  |
| 1638737_at | CG17209    | X  | 32524   | 13E14-13E1 | Dm.14839 | -0,145282 |
| 1641072_at | PEK        | 3R | 40653   | 83A4-83A4  | Dm.3303  | -0,165158 |
| 1625488_s. | Rho1       | 2R | 36775   | 52E5-52E5  | Dm.644   | -0,16347  |
| 1623934_at | blp        | 3R | 41937   | 89A8-89A8  | Dm.14264 | -0,18034  |
| 1629525_at | CG30152    | 2R | 246485  | 57A10-57A  | Dm.11199 | -0,170718 |
| 1625876_at | AP-1sigma  | 3R | 42835   | 95D1-95D1  | Dm.1305  | -0,157215 |
| 1625875_at | CG10635    | 3L | 38615   | 64C13-64C1 | Dm.19075 | -0,160952 |
| 1634329_at | CG32579    | X  | 318096  | 14B12-14B1 | Dm.10769 | -0,141247 |
| 1632753_a. | CG3980     | 2L | 33610   | 24C8-24C8  | Dm.7915  | -0,151561 |
| 1627806_at | CG11133    | 3L | 40512   | 80B2-80B2  | Dm.15043 | -0,159132 |
| 1626266_at | MAGE       | 3R | 40860   | 84C7-84C7  | Dm.4924  | -0,152159 |
| 1634217_s. | Crk        | 4  | 43775   | 102B1-102E | Dm.3226  | -0,157935 |

|                     |    |         |            |          |           |
|---------------------|----|---------|------------|----------|-----------|
| 1639838_at CG8483   | 3R | 41623   | 87E2-87E2  | Dm.4446  | 0,167155  |
| 1624141_at CG4901   | 2L | 34357   | 31B1-31B1  | Dm.10854 | -0,164473 |
| 1624310_s. CG4753   | 3L | 39819   | 72E4-72E4  | Dm.6346  | -0,164782 |
| 1625688_at CG6293   | 3R | 41259   | 86A7-86A7  | Dm.2071  | -0,148479 |
| 1624812_at CG11070  | 2L | 33932   | 26F3-26F4  | Dm.331   | -0,149989 |
| 1635580_at Cbl      | 3L | 38961   | 66C12-66C1 | Dm.2332  | -0,166531 |
| 1623479_at Rbf      | X  | 31027   | 1C5-1C5    | Dm.4654  | -0,151617 |
| 1639288_at Mys45A   | 2R | 35925   | 45A7-45A8  | Dm.3517  | -0,147705 |
| 1625505_at CG13896  | 3L | 38089   | 61C8-61C8  | Dm.25434 | -0,144318 |
| 1628469_a. CG32529  | X  | 33000   | 18F4-19A2  | Dm.31021 | -0,160112 |
| 1634405_s. Pak      | 3R | 44039   | 83E4-83E4  | Dm.1868  | -0,144177 |
| 1628420_s. CG6923   | 3R | 41420   | 86E17-86E1 | Dm.7827  | -0,14951  |
| 1634150_s. Hr78     | 3L | 40378   | 78D4-78D4  | Dm.6935  | -0,154502 |
| 1640285_at Tm1      | 3R | 41852   | 88E12-88E1 | Dm.19116 | 0,17039   |
| 1628080_at Gllspla2 | X  | 31747   | 7D16-7D17  | Dm.6657  | -0,154798 |
| 1636279_at l(1)1Bi  | X  | 31010   | 1B12-1B12  | Dm.5268  | -0,144177 |
| 1623989_at CG5734   | 2L | 34354   | 31B1-31B1  | Dm.3692  | -0,167436 |
| 1638678_at CG6522   | 2R | 36965   | 54B16-54B1 | Dm.666   | -0,16357  |
| 1637124_at sec13    | 3R | 44437   | 94E13-94E1 | Dm.7682  | -0,164639 |
| 1635824_at Tip60    | X  | 31362   | 4A6-4B1    | Dm.75    | -0,146368 |
| 1623040_at CG4449   | 3R | 42748   | 94E8-94E9  | Dm.13736 | -0,149245 |
| 1626337_at Eap      | 2R | 37964   | 60E1-60E1  | Dm.30940 | -0,159407 |
| 1637618_at Hs2st    | 2L | 44433   | 37E1-37E1  | Dm.4274  | -0,156615 |
| 1626585_s. CG4589   | 2R | 37912   | 60D3-60D3  | Dm.7406  | -0,157206 |
| 1631019_at CG5971   | 3L | 38989   | 66D9-66D9  | Dm.4495  | -0,153903 |
| 1627459_at CG9154   | 2L | 33858   | 26B4-26B4  | Dm.322   | -0,146378 |
| 1624997_s. 05-sep   | 2R | 43990   | 43F8-43F8  | Dm.3096  | -0,147745 |
| 1624620_at Klp61F   | 3L | 38135   | 61F4-61F4  | Dm.804   | -0,139547 |
| 1639200_at CG14333  | 3R | 42088   | 90A3-90A3  | Dm.27934 | 0,149755  |
| 1637053_at Cas      | 2L | 35016   | 36B1-36B2  | Dm.442   | -0,145673 |
| 1639826_at CG32662  | X  | 32136   | 10E6-10F1  | Dm.4433  | -0,166126 |
| 1636108_at CG17033  | 3L | 39735   | 72B2-72C1  | Dm.972   | -0,147814 |
| 1624390_a. thoc7    | 3L | 38033   | 61B2-61B2  | Dm.15964 | -0,161336 |
| 1633593_s. CG33223  | X  | 2768867 | 7F1-7F1    | Dm.33755 | -0,146082 |
| 1640644_at Surf6    | 3R | 42370   | 92B6-92B6  | Dm.31323 | -0,152265 |
| 1633822_at CG7519   | 3L | 40377   | 78D4-78D4  | Dm.5966  | -0,153787 |
| 1630858_s. CG7816   | 3R | 43533   | 99C4-99C5  | Dm.7928  | -0,13793  |
| 1623012_at mRpL55   | 3R | 42290   | 91F1-91F1  | Dm.3421  | -0,160994 |
| 1633752_at CG34413  | 2R | 37979   | 60E5-60E5  | Dm.7939  | -0,162162 |
| 1638203_at CG7339   | 3L | 39310   | 68D1-68D1  | Dm.11797 | -0,14943  |
| 1625908_a. TppII    | 2R | 36444   | 49F4-49F4  | Dm.7374  | -0,161269 |
| 1627027_at CG15168  | 2L | 35159   | 37B8-37B8  | Dm.6168  | -0,164048 |
| 1637861_at CG7786   | 2R | 36802   | 53A1-53A1  | Dm.27756 | 0,13228   |
| 1634866_at CG4880   | X  | 32680   | 15B4-15B4  | Dm.14809 | -0,135353 |
| 1631931_s. Sdc      | 2R | 37447   | 57E1-57E6  | Dm.721   | -0,151266 |
| 1638846_at CG3402   | 3L | 38077   | 61C8-61C8  | Dm.2160  | -0,142951 |
| 1626710_at SA       | 2L | 33974   | 27C7-27C7  | Dm.336   | -0,144818 |
| 1635980_s. CG12991  | X  | 32734   | 16B6-16B7  | Dm.13387 | -0,174438 |
| 1641424_at CG9723   | X  | 32639   | 14F5-14F5  | Dm.2036  | -0,15104  |
| 1636773_a. CG10981  | 3R | 40725   | 83C4-83C4  | Dm.1077  | -0,148831 |
| 1632256_at Taf1     | 3R | 40813   | 84A1-84A1  | Dm.7380  | -0,155901 |
| 1634722_s. mbf1     | 3L | 39842   | 73A9-73A9  | Dm.7996  | -0,162784 |
| 1629737_at dpa      | 2R | 35679   | 43C6-43C7  | Dm.21562 | -0,136724 |

|                      |    |        |            |             |           |
|----------------------|----|--------|------------|-------------|-----------|
| 1639617_at Gr39a     | 2L | 117346 | 39C1-39C1  | Dm.27684    | -0,135285 |
| 1638651_a CG3508     | 3R | 41778  | 88C10-88C1 | Dm.4480     | -0,141824 |
| 1626219_s Ogt        | 2R | 35486  | 41E4-41E5  | Dm.2728     | -0,158337 |
| 1640746_at CG18542   | 3R | 41176  | 85E4-85E4  | Dm.1130, D  | -0,160014 |
| 1634714_at cactin    | X  | 33043  | 19D1-19D1  | Dm.2875     | -0,128626 |
| 1641461_at CG34408   | X  | 31953  | 9B4-9B4    | Dm.3020     | -0,14833  |
| 1640161_at e(y)2     | X  | 45848  | 10C7-10C7  | Dm.31083    | -0,166154 |
| 1626506_at Syx18     | 3R | 42933  | 96A12-96A  | Dm.1652     | -0,142017 |
| 1623176_at CG16812   | 2L | 34722  | 34A10-34A  | Dm.4237     | -0,144477 |
| 1623902_at tsu       | 2R | 35924  | 45A7-45A7  | Dm.19884    | -0,152875 |
| 1629307_s hdc        | 3R | 43604  | 99E4-99F1  | Dm.1909     | -0,133014 |
| 1628429_at Sec61gamm | X  | 32968  | 18D11-18D  | Dm.6361     | -0,170467 |
| 1625500_at Mlh1      | 2R | 35796  | 44B8-44B8  | Dm.26257    | -0,1507   |
| 1632301_at CG9536    | 2L | 33904  | 26D7-26D7  | Dm.6442     | -0,145826 |
| 1638658_at Gos28     | 3R | 248102 | 91B8-91B8  | Dm.12874    | -0,14607  |
| 1632815_at CG16952   | X  | 32546  | 13F17-13F1 | Dm.7172     | -0,150449 |
| 1625201_s CG17230    | 3R | 41376  | 86E5-86E6  | Dm.4548     | -0,132878 |
| 1627152_at CG12918   | 2R | 36046  | 46D9-46D9  | Dm.12129    | -0,164727 |
| 1631519_at CG9143    | 2R | 37296  | 56F14-56F1 | Dm.22095    | -0,151421 |
| 1623698_s lap2       | 2R | 36748  | 52D2-52D2  | Dm.7173     | -0,158932 |
| 1623692_s rho-4      | X  | 32109  | 10C9-10C1  | Dm.1673     | -0,14959  |
| 1635013_s CG10722    | 2L | 35298  | 38B6-38B6  | Dm.14744    | -0,134    |
| 1637004_at pcs       | 2R | 36674  | 51D6-51D7  | Dm.4202     | -0,149087 |
| 1633727_s wnd        | 3L | 40143  | 76B9-76B9  | Dm.12913    | -0,168401 |
| 1636291_at Rae1      | 2R | 37467  | 57F6-57F6  | Dm.11463    | -0,151495 |
| 1629185_at CG6734    | 2L | 34616  | 33B8-33B9  | Dm.18103    | -0,147708 |
| 1639178_s mael       | 3L | 40489  | 80A1-80A1  | Dm.5827     | -0,149244 |
| 1627873_at CG5641    | 3R | 41529  | 87B10-87B1 | Dm.1170     | -0,15493  |
| 1629270_at Sry-delta | 3R | 43572  | 99D3-99D3  | Dm.1914     | -0,132854 |
| 1627207_at CG14352   | 2L | 33341  | 22A3-22A3  | Dm.5941     | -0,137755 |
| 1641091_at CG3280    | 3L | 39117  | 67C2-67C2  | Dm.15446    | 0,151907  |
| 1637056_s CG11200    | 2R | 37301  | 56F16-56F1 | Dm.706      | -0,165288 |
| 1633367_at CG6340    | X  | 32482  | 13C5-13C5  | Dm.169      | -0,141265 |
| 1629692_at CG15653   | 2R | 37388  | 57B16-57B1 | Dm.28040    | -0,15769  |
| 1632043_a shtd       | X  | 32473  | 13C3-13C4  | Dm.4453     | -0,129677 |
| 1638147_at CG7772    | X  | 32776  | 16F1-16F1  | Dm.4618     | -0,146072 |
| 1623819_at RanGap    | 2L | 35223  | 37E1-37E1  | Dm.3220     | -0,136914 |
| 1634222_at CG18596   | 3R | 42622  | 94A6-94A6  | Dm.1987     | -0,159577 |
| 1638386_at HLH3B     | X  | 31249  | 3B1-3B1    | Dm.13010    | 0,147613  |
| 1635647_at CG2617    | 2L | 35331  | 38D5-38D5  | Dm.19855    | -0,143456 |
| 1633349_at TfIIFbeta | 3R | 41290  | 86C6-86C6  | Dm.20167    | -0,147931 |
| 1634386_s Rab4       | 2R | 36992  | 54C9-54C1  | Dm.2700     | -0,148685 |
| 1636085_at CG18143   | 3R | 40528  | 82A1-82A1  | Dm.23299    | -0,150842 |
| 1639552_s CG6951     | 3L | 40222  | 77A3-77A4  | Dm.33820    | -0,143186 |
| 1625639_at CG6737    | 2L | 34482  | 32A5-32A5  | Dm.27677, I | 0,144513  |
| 1632687_at mib1      | 3L | 39750  | 72C2-72C2  | Dm.10758    | -0,144064 |
| 1628148_at unc-119   | X  | 31664  | 7B1-7B1    | Dm.93       | -0,130293 |
| 1626680_at CG9305    | 2L | 34748  | 34B8-34B8  | Dm.11440    | -0,143989 |
| 1639632_at CG1234    | 3R | 40870  | 84D3-84D3  | Dm.4465     | -0,149753 |
| 1633167_s CG32496    | X  | 318054 | 16F1-16F1  | Dm.31025    | 0,144229  |
| 1623087_at Gef64C    | 3L | 38578  | 64B13-64B1 | Dm.3853     | -0,164345 |
| 1627320_at zfh2      | 4  | 43795  | 102C1-102C | Dm.3906     | -0,159108 |
| 1629033_at CG2277    | 3L | 38148  | 61F5-61F5  | Dm.4498     | -0,136038 |



|                     |    |         |            |          |           |
|---------------------|----|---------|------------|----------|-----------|
| 1634116_at CG7158   | 3L | 40410   | 78E3-78E3  | Dm.3610  | -0,153481 |
| 1635407_at CG32772  | X  | 31420   | 4D5-4D5    | Dm.1986  | -0,125874 |
| 1637810_at CG5780   | 2L | 34676   | 33F3-33F3  | Dm.5424  | -0,145457 |
| 1639376_at CG10591  | 3L | 38634   | 64D5-64D5  | Dm.10982 | 0,139718  |
| 1635588_at CG14977  | 3L | 38454   | 63F5-63F5  | Dm.14162 | -0,164395 |
| 1637118_at CG30010  | 2R | 246389  | 46B4-46B4  | Dm.14599 | -0,157221 |
| 1634724_at CG12499  | 3R | 42637   | 94A14-94A  | Dm.24981 | -0,127008 |
| 1637517_s. KrT95D   | 3R | 42843   | 95D5-95D8  | Dm.6042  | -0,142824 |
| 1636718_s. CG4502   | 2L | 34002   | 27E4-27E4  | Dm.340   | -0,157235 |
| 1626738_at CG4644   | 2L | 33285   | 21F1-21F1  | Dm.12209 | -0,133007 |
| 1624152_at CG11851  | 3R | 43031   | 96C6-96C7  | Dm.7685  | -0,149367 |
| 1630703_at CG8963   | 2R | 36913   | 53E4-53E4  | Dm.4633  | -0,153399 |
| 1640430_s. CG15881  | 3L | 40159   | 76C5-76C6  | Dm.6970  | -0,16087  |
| 1623810_at CG17265  | 2L | 33509   | 23C4-23C4  | Dm.283   | -0,15481  |
| 1629592_at CG8931   | X  | 32564   | 14A5-14A5  | Dm.4581  | -0,138412 |
| 1623031_a. RecQ4    | 3L | 53438   | 66B10-66B1 | Dm.1556  | -0,140525 |
| 1629305_at Nup214   | 2R | 46091   | 59B4-59B6  | Dm.12859 | -0,140403 |
| 1633911_a. CG31550  | 3R | 40661   | 83A5-83A5  | Dm.3932  | -0,140398 |
| 1625211_s. CG32810  | X  | 31110   | 2B1-2B1    | Dm.15    | -0,141922 |
| 1630514_at Gprk1    | 2R | 3355013 |            | Dm.1704  | -0,159133 |
| 1623194_at CG7637   | 2R | 36135   | 47C1-47C1  | Dm.30961 | -0,171573 |
| 1638600_at ebi      | 2L | 33212   | 21C2-21C2  | Dm.3639  | -0,165563 |
| 1641279_at ben      | X  | 32358   | 12D2-12D2  | Dm.2088  | -0,166134 |
| 1638782_at CG8195   | 2R | 36725   | 52A12-52A  | Dm.4193  | -0,147268 |
| 1632728_at Gcn2     | 3R | 43709   | 100C3-100C | Dm.2985  | -0,134785 |
| 1625046_at CG10648  | X  | 31818   | 8B7-8B7    | Dm.2116  | -0,136745 |
| 1631768_at qkr58E-1 | 2R | 37561   | 58D8-58D8  | Dm.2571  | -0,142187 |
| 1638758_at CG3016   | X  | 31519   | 5C5-5C6    | Dm.2026  | -0,142245 |
| 1639206_at CG15914  | X  | 32542   | 13F14-13F1 | Dm.31058 | -0,15205  |
| 1632161_at nbs      | 3L | 44259   | 67C5-67C5  | Dm.1431  | -0,155001 |
| 1630151_at spn-D    | 3R | 318579  | 97E6-97E6  | Dm.6085  | -0,14379  |
| 1624665_at CG9257   | 2L | 35375   | 39A2-39A2  | Dm.6325  | -0,14673  |
| 1635581_at CG8300   | X  | 31658   | 6F5-6F5    | Dm.91    | -0,134428 |
| 1626584_a. SMSr     | 3L | 38823   | 65F7-65F9  | Dm.874   | -0,144407 |
| 1631876_at CG15266  | 2L | 34893   | 35C5-35C5  | Dm.26815 | -0,169116 |
| 1641378_at phtf     | 2R | 35583   | 42C7-42C7  | Dm.3021  | -0,148506 |
| 1637398_a. capu     | 2L | 33611   | 24C8-24C9  | Dm.4776  | -0,137875 |
| 1634171_at CG12231  | X  | 32942   | 18C8-18C8  | Dm.27591 | 0,152895  |
| 1627871_at Abd-B    | 3R | 47763   | 89E4-89E5  | Dm.1763  | 0,145805  |
| 1631194_at CG10265  | 2R | 36676   | 51D7-51D7  | Dm.3825  | -0,134808 |
| 1625844_s. apt      | 2R | 37734   | 59F1-59F4  | Dm.6653  | -0,122124 |
| 1637214_a. scra     | 2R | 35696   | 43E3-43E3  | Dm.508   | -0,143543 |
| 1623793_at krz      | 3R | 53554   | 100E3-100E | Dm.5655  | -0,133075 |
| 1627331_at Taf5     | 2R | 47900   | 47C5-47C5  | Dm.19905 | -0,137424 |
| 1625464_at Marf     | X  | 31581   | 5F4-5F4    | Dm.11038 | -0,171201 |
| 1624894_s. CSN8     | 2L | 49077   | 29B2-29B2  | Dm.33149 | -0,15047  |
| 1638125_a. msi      | 3R | 43087   | 96E2-96E4  | Dm.1334  | -0,151692 |
| 1638673_at Bap      | X  | 32987   | 18E4-18E5  | Dm.2885  | -0,15794  |
| 1629493_at U26      | 2L | 34175   | 29C5-29C5  | Dm.3089  | -0,128809 |
| 1623487_at dmt      | 3R | 41180   | 85E5-85E5  | Dm.2455  | -0,148162 |
| 1638303_at CG33160  | 3L | 326265  | 63B12-63B1 | Dm.31165 | 0,15393   |
| 1626481_a. tafazzin | 2R | 36405   | 49C2-49C2  | Dm.6762  | -0,153632 |
| 1641711_at CG13360  | X  | 31025   | 1C4-1C4    | Dm.19662 | -0,136765 |

|                        |    |        |             |          |           |
|------------------------|----|--------|-------------|----------|-----------|
| 1626523_a. Aats-glupro | 3R | 42834  | 95D1-95D1   | Dm.1304  | -0,14877  |
| 1623584_a  hkl         | 2L | 35173  | 37B11-37B11 | Dm.2091  | -0,150692 |
| 1633846_a  CG15523     | 3R | 43550  | 99C7-99C7   | Dm.16311 | -0,137668 |
| 1630841_a  CG8668      | 2L | 34107  | 28E7-28E7   | Dm.347   | -0,146243 |
| 1634377_a  CG14646     | 3R | 40555  | 82A5-82A5   | Dm.7582  | -0,134313 |
| 1624473_a  DNAprim     | 3L | 44915  | 77B6-77B6   | Dm.7051  | -0,135831 |
| 1632194_a  Nup98       | 3R | 42816  | 95B1-95B5   | Dm.14811 | -0,141988 |
| 1623825_s. CG17018     | 2L | 49895  | 40F7-40F7   | Dm.20928 | -0,140791 |
| 1633792_a. osa         | 3R | 42130  | 90C1-90C2   | Dm.2989  | -0,139097 |
| 1634122_a  CG31223     | 3R | 326127 | 93A1-93A1   | Dm.21119 | -0,133725 |
| 1639411_a  l(1)G0148   | X  | 31598  | 6C3-6C3     | Dm.11300 | -0,143502 |
| 1637547_a  CG8199      | 3R | 41149  | 85D24-85D24 | Dm.12640 | -0,140765 |
| 1640300_a  CG33144     | 2R | 36131  | 47B9-47B11  | Dm.10908 | -0,141982 |
| 1624632_a  Klp3A       | X  | 31240  | 3A6-3A6     | Dm.1693  | -0,139801 |
| 1635755_a. CG10741     | 3L | 39521  | 70B2-70B3   | Dm.15316 | -0,136776 |
| 1624673_a  CG5899      | 2L | 34311  | 30E1-30E4   | Dm.3953  | -0,15583  |
| 1627154_a  CG10904     | 2R | 37817  | 60A14-60A14 | Dm.6015  | -0,144275 |
| 1627924_a  Rpl135      | 2L | 33210  | 21C2-21C2   | Dm.30753 | -0,131261 |
| 1628011_a. CG12877     | 3R | 43333  | 98B2-98B2   | Dm.14943 | -0,143074 |
| 1631330_a  CG3408      | 3L | 39107  | 67B10-67B11 | Dm.4947  | -0,14024  |
| 1627020_a  CG11110     | 2R | 37337  | 57A8-57A8   | Dm.15796 | -0,142096 |
| 1628960_s. CG17829     | X  | 47718  | 1B12-1B12   | Dm.10946 | -0,140851 |
| 1640526_a  CG1103      | 3R | 40547  | 82A4-82A4   | Dm.1054  | -0,154144 |
| 1635710_a  CG15470     | X  | 31417  | 4D4-4D5     | Dm.26460 | 0,128461  |
| 1628019_a. spas        | 3R | 42846  | 95D9-95D9   | Dm.7035  | -0,131623 |
| 1637085_a  Cdk5        | 2R | 36727  | 52A13-52A13 | Dm.640   | -0,13377  |
| 1639599_a  CG4887      | 2L | 33304  | 21F2-21F2   | Dm.7247  | -0,137676 |
| 1630805_a  noi         | 3R | 40678  | 83B4-83B4   | Dm.4519  | -0,146763 |
| 1634172_a  TflIB       | 2L | 34430  | 31E2-31E2   | Dm.4476  | -0,126153 |
| 1640145_a  bys         | X  | 31701  | 7C2-7C2     | Dm.98    | -0,141344 |
| 1624550_a  Trf         | 2L | 34102  | 28E1-28E1   | Dm.3090  | -0,130861 |
| 1627280_s. pnut        | 2R | 35801  | 44C2-44C2   | Dm.4132  | -0,147348 |
| 1630741_s. PGRP-LB     | 3R | 41379  | 86E6-86E6   | Dm.3374  | -0,151754 |
| 1635473_a  Apf         | 2L | 318908 | 30F1-30F1   | Dm.24355 | -0,137163 |
| 1627938_a  CG17840     | 2L | 33658  | 24F4-24F4   | Dm.297   | -0,14303  |
| 1633364_a  CG14184     | 3L | 40193  | 76E1-76E1   | Dm.30734 | -0,159735 |
| 1628731_s. CG8080      | 2R | 35918  | 45A2-45A2   | Dm.20768 | -0,148259 |
| 1636721_a  Pc          | 3L | 40358  | 78C6-78C7   | Dm.13644 | -0,139954 |
| 1632816_a  Es2         | X  | 31780  | 7E11-7E11   | Dm.31045 | -0,139769 |
| 1627131_a  spt4        | 2R | 36387  | 49B10-49B11 | Dm.19918 | -0,158914 |
| 1627509_s. hoe1        | 2L | 249663 | 25B3-25B3   | Dm.6487  | -0,143759 |
| 1633767_a  Hrp59       | 3R | 41138  | 85D18-85D18 | Dm.7304  | -0,133137 |
| 1636896_a. CG12576     | X  | 33135  | 20B3-20B3   | Dm.6439  | -0,149917 |
| 1641618_a  Gycalpha99E | 3R | 43493  | 99B7-99B7   | Dm.3968  | 0,121746  |
| 1636073_a  CG32344     | 3L | 326208 | 61C1-61C1   | Dm.796   | -0,14737  |
| 1628638_a  CG7200      | 2L | 35089  | 36E6-36E6   | Dm.7940  | -0,142219 |
| 1627279_a  nwk         | 3L | 39052  | 67A1-67A1   | Dm.15455 | 0,126089  |
| 1624837_a  CG7506      | 3L | 38857  | 66A8-66A8   | Dm.3946  | -0,138486 |
| 1631784_a  CG13663     | 3R | 43029  | 96C5-96C5   | Dm.25487 | -0,128252 |
| 1640077_a  CalpC       | X  | 32597  | 14B13-14B13 | Dm.178   | -0,136445 |
| 1634393_s. Klp10A      | X  | 32049  | 10A6-10A6   | Dm.130   | -0,139919 |
| 1627832_a  scat        | 2L | 47942  | 30B3-30B3   | Dm.1628  | -0,150694 |
| 1628524_a  CG31008     | 3R | 318554 | 100B1-100E  | Dm.33607 | 0,137276  |

|                          |    |         |             |          |           |
|--------------------------|----|---------|-------------|----------|-----------|
| 1623820_ai CG12252       | 2R | 37925   | 60D5-60D5   | Dm.10903 | -0,133579 |
| 1637060_a. Nopp140       | 3L | 40433   | 78F4-78F4   | Dm.3277  | -0,141988 |
| 1623402_ai Arc-p34       | 2L | 35311   | 38C6-38C6   | Dm.4005  | -0,151945 |
| 1628943_ai Tsf2          | 3L | 39435   | 69C4-69C5   | Dm.944   | -0,15598  |
| 1636446_ai CSN6          | 3R | 42661   | 94B5-94B5   | Dm.2377  | -0,13478  |
| 1632389_ai CG14812       | X  | 31137   | 2B12-2B12   | Dm.19624 | -0,149714 |
| 1632956_ai CG3021        | X  | 53546   | 1E1-1E1     | Dm.23134 | -0,148656 |
| 1639051_ai CG12938       | 2R | 36141   | 47C1-47C1   | Dm.30962 | -0,153118 |
| 1631092_ai CG8032        | 3R | 41026   | 85A5-85A5   | Dm.1103  | -0,129096 |
| 1632593_ai CG32147       | 3L | 251690  | 71B5-71B5   | Dm.6181  | -0,14247  |
| 1623130_ai CG30457       | 2R | 36940   | 54A2-54A2   | Dm.15979 | 0,149833  |
| 1633643_a. CG31033       | 3R | 326115  | 99C2-99C2   | Dm.20800 | -0,131799 |
| 1624994_ai dup           | 2R | 47121   | 51F11-51F1  | Dm.1771  | -0,138254 |
| 1637555_ai mtTFB1        | 3L | 39320   | 68D2-68D2   | Dm.29643 | -0,134997 |
| 1639258_ai CG7335        | 3L | 40203   | 76F2-76F2   | Dm.31215 | 0,135556  |
| 1633466_ai CG7728        | 3L | 39904   | 73E4-73E4   | Dm.3597  | -0,13654  |
| 1638014_ai CG5808        | 3R | 42957   | 96A23-96A23 | Dm.3212  | -0,132057 |
| 1634182_ai CG11593       | 3L | 38477   | 64A4-64A4   | Dm.10937 | -0,139898 |
| 1627209_ai mRNA-cappir X |    | 32379   | 12E5-12E5   | Dm.5295  | -0,138112 |
| 1623384_ai ytr           | 2R | 47457   | 60A3-60A3   | Dm.754   | -0,132546 |
| 1638621_ai CG31648       | 2L | 33776   | 25E5-25E5   | Dm.33604 | -0,139773 |
| 1640669_ai CG17163       | X  | 3354988 |             | Dm.6075  | -0,133258 |
| 1640241_ai Tudor-SN      | 3L | 38045   | 61B3-61B3   | Dm.795   | -0,146608 |
| 1626768_ai CG7044        | 3R | 42497   | 93B11-93B1  | Dm.6369  | -0,1423   |
| 1631719_ai CG31109       | 3R | 43001   | 96B19-96B1  | Dm.6101  | -0,153183 |
| 1622895_ai CG32075       | 3L | 326192  | 68A3-68A4   | Dm.925   | -0,153278 |
| 1625755_ai CG1291        | 3L | 38374   | 63B5-63B6   | Dm.832   | -0,145973 |
| 1630393_a. Hrs           | 2L | 33458   | 23A3-23A3   | Dm.274   | -0,118717 |
| 1629964_ai Nufip         | 3L | 40043   | 75D8-75D8   | Dm.3502  | -0,134579 |
| 1641448_a. Dg            | 2R | 36773   | 52E2-52E4   | Dm.1504  | -0,129322 |
| 1634659_ai DI            | 3R | 42313   | 92A1-92A2   | Dm.7687  | -0,13377  |
| 1629281_ai Dhh1          | 3L | 39195   | 67E3-67E3   | Dm.921   | -0,139077 |
| 1638575_ai Mcm6          | X  | 31603   | 6C4-6C5     | Dm.2944  | -0,125753 |
| 1641449_ai Dcr-2         | 2R | 36993   | 54C10-54C1  | Dm.7764  | -0,140272 |
| 1631534_ai sfl           | 3L | 38736   | 65B3-65B4   | Dm.4995  | -0,125937 |
| 1626647_ai Mcm5          | 3R | 41296   | 86C6-86C6   | Dm.5829  | -0,135793 |
| 1631125_ai CG15737       | X  | 32152   | 10F4-10F4   | Dm.6637  | -0,13304  |
| 1627694_ai CG9715        | 3L | 39883   | 73D1-73D1   | Dm.6658  | -0,133295 |
| 1625603_ai CG13604       | 3R | 42840   | 95D5-95D5   | Dm.4624  | -0,11894  |
| 1634451_ai CG12236       | X  | 31523   | 5C7-5C7     | Dm.2138  | -0,134038 |
| 1635102_ai syt           | 2L | 33473   | 23A6-23B1   | Dm.19478 | 0,143168  |
| 1623350_ai Lrr47         | 2L | 34449   | 31F5-31F5   | Dm.2776  | -0,133246 |
| 1624168_ai CG14411       | X  | 32408   | 12F5-12F5   | Dm.10811 | -0,131067 |
| 1629806_a. CG32103       | 3L | 39415   | 69B4-69B5   | Dm.10857 | -0,132151 |
| 1640568_ai CstF-64       | 3R | 42239   | 91B8-91B8   | Dm.4853  | -0,127015 |
| 1623773_ai CG32082       | 3L | 39258   | 68A8-68A9   | Dm.21623 | 0,122876  |
| 1635551_ai CG8386        | 2R | 36762   | 52D12-52D1  | Dm.642   | -0,129451 |
| 1624881_ai CG11448       | X  | 31090   | 2A1-2A1     | Dm.12    | -0,134203 |
| 1638840_ai CG14641       | 3R | 40529   | 82A1-82A1   | Dm.3575  | -0,128698 |
| 1628785_ai Il(3)04053    | 3L | 46158   | 80A1-80A1   | Dm.4222  | -0,135973 |
| 1626719_a. wls           | 3L | 39259   | 68A9-68A9   | Dm.7728  | -0,136873 |
| 1631006_a. CG10171       | 3L | 39501   | 70A7-70A8   | Dm.952   | -0,132844 |
| 1624252_s. sle           | 3R | 41262   | 86A8-86B1   | Dm.4098  | -0,144726 |

|                         |    |         |            |          |           |
|-------------------------|----|---------|------------|----------|-----------|
| 1631173_ai dob          | X  | 32436   | 13A8-13A8  | Dm.2112  | -0,121529 |
| 1631696_s. MAN1         | 2R | 37838   | 60B5-60B5  | Dm.7321  | -0,148297 |
| 1637111_a. PR2          | 2R | 36442   | 49F3-49F4  | Dm.4488  | -0,132081 |
| 1631466_ai CG1523       | 3R | 43400   | 98E5-98E5  | Dm.4423  | -0,133152 |
| 1638031_ai CG14512      | 3R | 43443   | 98F12-98F1 | Dm.31353 | -0,134529 |
| 1640158_ai CG2608       | 2L | 35323   | 38D2-38D2  | Dm.3666  | -0,136213 |
| 1636847_s. Mkrn1        | 3L | 44131   | 78D5-78D5  | Dm.1642  | -0,135618 |
| 1626883_ai CG1620       | 2R | 35678   | 43C5-43C6  | Dm.4394  | -0,135963 |
| 1623967_ai Shc          | 3L | 44052   | 67B5-67B5  | Dm.1644  | -0,142632 |
| 1630850_ai CG30469      | 2R | 246631  | 52A6-52A6  | Dm.26407 | -0,133083 |
| 1624352_ai dpr13        | 2R | 3885598 | 55A3-55A3  | Dm.23935 | 0,130365  |
| 1639279_a. Rlc1         | 3R | 41141   | 85D19-85D  | Dm.20784 | -0,14772  |
| 1626818_ai CG13097      | 2L | 34184   | 29D3-29D4  | Dm.359   | -0,142074 |
| 1640758_ai CG32613      | X  | 318117  | 12D1-12D1  | Dm.6390  | -0,126386 |
| 1633962_a. CG14815      | X  | 31141   | 2B13-2B13  | Dm.11465 | -0,134626 |
| 1638522_ai CG12123      | X  | 31777   | 7E9-7E9    | Dm.107   | -0,115856 |
| 1639605_ai CG33993      | 3L | 3885637 | 65A1-65A1  | Dm.29571 | 0,139584  |
| 1627897_ai CG12265      | 3R | 42077   | 89F1-89F1  | Dm.1578  | -0,127405 |
| 1627295_s. CycD         | X  | 32551   | 13F18-14A1 | Dm.2096  | -0,124135 |
| 1636164_s. CG3107       | 2R | 35475   | 41D3-41D3  | Dm.13025 | -0,123159 |
| 1624743_s. PpD3         | 3R | 49779   | 85E6-85E6  | Dm.6984  | -0,133317 |
| 1633860_ai CG12078      | 3L | 38401   | 63C1-63C1  | Dm.27812 | 0,132596  |
| 1623315_ai CG13253      | 3L | 40288   | 77E3-77E3  | Dm.18595 | 0,127617  |
| 1625898_s. Lnk          | 3R | 43130   | 96F6-96F6  | Dm.7043  | -0,119008 |
| 1634226_ai CG17249      | 3L | 38201   | 62A9-62A9  | Dm.11207 | -0,12767  |
| 1632318_ai CG12773      | X  | 31082   | 1F4-1F4    | Dm.11524 | -0,141231 |
| 1636002_ai CG4281       | X  | 31171   | 2C8-2C8    | Dm.3910  | -0,126591 |
| 1624447_s. dco          | 3R | 43673   | 100B2-100E | Dm.1901  | -0,145252 |
| 1630839_ai CG14804      | X  | 31144   | 2B13-2B13  | Dm.11603 | -0,136185 |
| 1628241_ai CG2614       | 2L | 35326   | 38D2-38D2  | Dm.5004  | -0,121883 |
| 1622930_a. CG1957       | 3R | 43426   | 98F5-98F5  | Dm.1362  | -0,142707 |
| 1627995_ai Art8         | 2L | 34528   | 32C1-32C1  | Dm.30827 | -0,129999 |
| 1625386_ai da           | 2L | 34413   | 31D11-31E1 | Dm.388   | -0,133041 |
| 1636939_ai Tango6       | 2L | 35155   | 37B7-37B8  | Dm.464   | -0,133177 |
| 1628767_s. MED26        | 4  | 43816   | 102C3-102C | Dm.18596 | -0,128127 |
| 1632080_s. Cpr67Fa1     | 3L | 39223   | 67F1-67F1  | Dm.7034  | 0,133253  |
| 1625944_a. CG16838      | 3L | 39770   | 72D9-72D9  | Dm.11503 | -0,126934 |
| 1637264_ai ncd          | 3R | 43517   | 99C1-99C2  | Dm.6668  | -0,124781 |
| 1627636_ai CG14636      | 3R | 40526   | 81F6-82A1  | Dm.13649 | 0,126748  |
| 1637727_ai CG7049       | 3L | 38022   | 61B2-61B2  | Dm.793   | -0,123099 |
| 1627087_ai CG14805      | X  | 31146   | 2B14-2B14  | Dm.11436 | -0,139099 |
| 1624425_ai CG7384       | 2L | 34447   | 31F4-31F4  | Dm.393   | -0,123566 |
| 1636809_ai Lam          | 2L | 33782   | 25E6-25E6  | Dm.312   | -0,143364 |
| 1624145_a. isopeptidase | 2R | 37261   | 56E1-56E1  | Dm.9242  | -0,133551 |
| 1636986_ai l(2)35Df     | 2L | 48782   | 35D4-35D4  | Dm.1748  | -0,131639 |
| 1636651_a. Csp          | 3L | 40459   | 79D3-79D3  | Dm.5140  | -0,137549 |
| 1638290_ai CG32528      | X  | 32990   | 18E5-18F1  | Dm.11318 | -0,11439  |
| 1629766_ai ca           | 3R | 43518   | 99C2-99C2  | Dm.6851  | -0,124784 |
| 1630182_ai bin          | 3L | 38766   | 65D6-65D6  | Dm.5684  | 0,135235  |
| 1635129_ai CG6332       | 3R | 42585   | 93F14-93F1 | Dm.12009 | 0,120315  |
| 1633693_ai CG13814      | 3L | 40223   | 77A4-77A4  | Dm.27186 | 0,123837  |
| 1632109_s. alphaCop     | 3L | 38199   | 62A9-62A9  | Dm.2217  | -0,137825 |
| 1631577_a. CG3760       | 2R | 37987   | 60E5-60E5  | Dm.6816  | -0,130375 |

|                     |    |                  |          |           |
|---------------------|----|------------------|----------|-----------|
| 1641590_ai timeout  | 3R | 41615 87D12-87D1 | Dm.2433  | -0,115026 |
| 1633166_ai CG12942  | 2R | 36158 47C6-47C6  | Dm.30902 | -0,129576 |
| 1640805_ai CG13162  | 2R | 36341 48F11-49A1 | Dm.26909 | -0,114896 |
| 1629016_s_unc-13-4A | 3L | 38801 65E10-65E1 | Dm.21296 | 0,134214  |
| 1639941_ai CG15317  | X  | 31898 8E7-8E7    | Dm.25382 | -0,126051 |
| 1634784_ai yemalpha | 3R | 43439 98F10-98F1 | Dm.21691 | -0,136079 |
| 1641147_s_CG3632    | X  | 32589 14B9-14B9  | Dm.6627  | -0,126703 |
| 1632954_ai JTBR     | 3L | 38235 62B4-62B4  | Dm.24703 | -0,119975 |
| 1629384_ai Brd8     | 3R | 43460 99A1-99A1  | Dm.20273 | -0,125172 |
| 1624343_ai Opbp     | 2R | 246618 42C2-42C2 | Dm.14929 | -0,117549 |
| 1641632_ai CG17048  | 2R | 36479 50A3-50A3  | Dm.26922 | 0,117081  |
| 1635901_ai CG17197  | 3R | 43111 96F2-96F2  | Dm.31346 | 0,12762   |
| 1638591_ai Tif-IA   | 2L | 35454 40F6-40F7  | Dm.485   | -0,123768 |
| 1626106_a_CG7139    | 3L | 40448 79B2-79B2  | Dm.3205  | -0,120162 |
| 1625459_ai CG3520   | 2R | 37708 59D10-59D1 | Dm.14059 | -0,115994 |

| PValue   | adjPVal  |
|----------|----------|
| 0,002688 | 0,079352 |
| 0,006081 | 0,079824 |
| 0,016108 | 0,090657 |
| 0,000235 | 0,079352 |
| 0,002673 | 0,079352 |
| 0,018002 | 0,093554 |
| 0,006106 | 0,079824 |
| 0,00014  | 0,079352 |
| 0,000334 | 0,079352 |
| 0,000246 | 0,079352 |
| 0,011946 | 0,08635  |
| 0,001014 | 0,079352 |
| 0,000231 | 0,079352 |
| 0,002483 | 0,079352 |
| 0,001432 | 0,079352 |
| 0,004105 | 0,079352 |
| 0,012466 | 0,086835 |
| 0,001401 | 0,079352 |
| 0,000405 | 0,079352 |
| 0,001571 | 0,079352 |
| 0,000309 | 0,079352 |
| 0,000386 | 0,079352 |
| 0,001158 | 0,079352 |
| 6,81E-05 | 0,079352 |
| 0,00073  | 0,079352 |
| 0,000232 | 0,079352 |
| 0,001172 | 0,079352 |
| 0,008722 | 0,082596 |
| 0,006297 | 0,079824 |
| 0,002038 | 0,079352 |
| 0,000153 | 0,079352 |
| 0,008075 | 0,082596 |
| 0,00053  | 0,079352 |
| 0,000809 | 0,079352 |
| 0,000649 | 0,079352 |
| 0,009425 | 0,082596 |
| 0,00173  | 0,079352 |
| 0,000586 | 0,079352 |
| 0,013611 | 0,087896 |
| 0,020576 | 0,096932 |
| 0,000151 | 0,079352 |
| 0,00145  | 0,079352 |
| 0,00377  | 0,079352 |
| 0,000874 | 0,079352 |
| 0,007354 | 0,081257 |
| 0,000239 | 0,079352 |
| 0,000381 | 0,079352 |
| 0,005548 | 0,079824 |
| 0,004512 | 0,079824 |
| 0,001579 | 0,079352 |
| 0,001068 | 0,079352 |
| 0,000257 | 0,079352 |

|          |          |
|----------|----------|
| 0,000112 | 0,079352 |
| 8,42E-05 | 0,079352 |
| 0,001527 | 0,079352 |
| 0,012974 | 0,087247 |
| 0,001091 | 0,079352 |
| 0,000185 | 0,079352 |
| 0,004037 | 0,079352 |
| 0,003721 | 0,079352 |
| 0,000443 | 0,079352 |
| 0,00265  | 0,079352 |
| 0,011424 | 0,085642 |
| 0,000549 | 0,079352 |
| 0,005334 | 0,079824 |
| 0,004269 | 0,079352 |
| 0,00479  | 0,079824 |
| 0,001566 | 0,079352 |
| 0,020841 | 0,096932 |
| 0,020559 | 0,096932 |
| 0,003216 | 0,079352 |
| 0,006261 | 0,079824 |
| 0,002441 | 0,079352 |
| 0,002386 | 0,079352 |
| 0,004145 | 0,079352 |
| 0,000235 | 0,079352 |
| 0,001121 | 0,079352 |
| 0,002422 | 0,079352 |
| 0,001123 | 0,079352 |
| 0,000813 | 0,079352 |
| 0,002933 | 0,079352 |
| 0,000716 | 0,079352 |
| 0,009171 | 0,082596 |
| 0,000893 | 0,079352 |
| 0,005043 | 0,079824 |
| 0,00408  | 0,079352 |
| 0,002385 | 0,079352 |
| 0,004394 | 0,079352 |
| 0,014742 | 0,089364 |
| 0,012769 | 0,086835 |
| 0,002493 | 0,079352 |
| 0,007314 | 0,081257 |
| 0,001935 | 0,079352 |
| 0,020499 | 0,096932 |
| 0,001709 | 0,079352 |
| 0,004119 | 0,079352 |
| 0,015084 | 0,089867 |
| 0,003119 | 0,079352 |
| 0,005582 | 0,079824 |
| 0,004386 | 0,079352 |
| 0,01473  | 0,089364 |
| 0,002447 | 0,079352 |
| 0,005606 | 0,079824 |
| 0,005386 | 0,079824 |
| 0,006231 | 0,079824 |

|          |          |
|----------|----------|
| 0,002484 | 0,079352 |
| 0,003583 | 0,079352 |
| 0,005366 | 0,079824 |
| 0,002063 | 0,079352 |
| 0,014123 | 0,088999 |
| 0,007537 | 0,082088 |
| 0,005473 | 0,079824 |
| 0,012135 | 0,086778 |
| 0,008352 | 0,082596 |
| 0,006708 | 0,08073  |
| 0,004072 | 0,079352 |
| 0,015297 | 0,089971 |
| 0,009048 | 0,082596 |
| 0,00892  | 0,082596 |
| 0,008804 | 0,082596 |
| 0,016961 | 0,091758 |
| 0,004123 | 0,079352 |
| 0,008207 | 0,082596 |
| 0,012749 | 0,086835 |
| 0,018799 | 0,094796 |
| 0,021704 | 0,098529 |
| 0,006026 | 0,079824 |
| 0,018083 | 0,093554 |
| 0,00732  | 0,081257 |
| 0,0077   | 0,082596 |
| 0,004041 | 0,079352 |
| 0,002574 | 0,079352 |
| 0,001949 | 0,079352 |
| 0,001288 | 0,079352 |
| 0,001691 | 0,079352 |
| 0,008658 | 0,082596 |
| 0,001396 | 0,079352 |
| 0,000177 | 0,079352 |
| 0,001553 | 0,079352 |
| 0,018347 | 0,094163 |
| 0,00116  | 0,079352 |
| 0,008205 | 0,082596 |
| 0,000754 | 0,079352 |
| 0,001889 | 0,079352 |
| 0,000316 | 0,079352 |
| 0,005034 | 0,079824 |
| 0,005312 | 0,079824 |
| 0,018687 | 0,094738 |
| 0,000425 | 0,079352 |
| 0,000971 | 0,079352 |
| 0,001874 | 0,079352 |
| 0,001849 | 0,079352 |
| 0,000881 | 0,079352 |
| 0,000207 | 0,079352 |
| 0,000357 | 0,079352 |
| 0,012915 | 0,087247 |
| 0,00434  | 0,079352 |
| 0,004162 | 0,079352 |



|          |          |
|----------|----------|
| 0,015869 | 0,090543 |
| 0,003359 | 0,079352 |
| 0,017398 | 0,092761 |
| 0,011998 | 0,08635  |
| 0,003202 | 0,079352 |
| 0,020388 | 0,096827 |
| 0,000419 | 0,079352 |
| 0,000414 | 0,079352 |
| 0,000512 | 0,079352 |
| 0,000322 | 0,079352 |
| 0,000968 | 0,079352 |
| 0,001274 | 0,079352 |
| 0,000308 | 0,079352 |
| 0,000474 | 0,079352 |
| 0,005682 | 0,079824 |
| 0,001067 | 0,079352 |
| 0,004689 | 0,079824 |
| 0,00702  | 0,081257 |
| 0,012614 | 0,086835 |
| 0,005304 | 0,079824 |
| 0,000782 | 0,079352 |
| 0,015887 | 0,090543 |
| 0,002619 | 0,079352 |
| 0,001646 | 0,079352 |
| 0,005943 | 0,079824 |
| 0,001214 | 0,079352 |
| 0,004273 | 0,079352 |
| 0,000367 | 0,079352 |
| 0,001162 | 0,079352 |
| 0,021994 | 0,098784 |
| 0,007221 | 0,081257 |
| 0,001977 | 0,079352 |
| 0,000818 | 0,079352 |
| 0,003818 | 0,079352 |
| 0,002637 | 0,079352 |
| 0,003881 | 0,079352 |
| 0,000625 | 0,079352 |
| 0,002912 | 0,079352 |
| 0,002859 | 0,079352 |
| 0,002228 | 0,079352 |
| 0,012102 | 0,086752 |
| 0,000963 | 0,079352 |
| 0,005379 | 0,079824 |
| 0,001352 | 0,079352 |
| 0,003484 | 0,079352 |
| 0,001821 | 0,079352 |
| 0,002795 | 0,079352 |
| 0,002707 | 0,079352 |
| 0,004569 | 0,079824 |
| 0,002027 | 0,079352 |
| 0,001062 | 0,079352 |
| 0,002422 | 0,079352 |
| 0,002886 | 0,079352 |

|          |          |
|----------|----------|
| 0,006247 | 0,079824 |
| 0,001871 | 0,079352 |
| 0,009475 | 0,082751 |
| 0,001702 | 0,079352 |
| 0,002007 | 0,079352 |
| 0,000539 | 0,079352 |
| 0,00092  | 0,079352 |
| 0,006566 | 0,079824 |
| 0,007503 | 0,081972 |
| 0,0004   | 0,079352 |
| 0,001998 | 0,079352 |
| 0,000756 | 0,079352 |
| 0,000954 | 0,079352 |
| 0,002422 | 0,079352 |
| 0,001817 | 0,079352 |
| 0,00541  | 0,079824 |
| 0,003196 | 0,079352 |
| 0,002055 | 0,079352 |
| 0,004278 | 0,079352 |
| 0,007224 | 0,081257 |
| 0,007248 | 0,081257 |
| 0,003793 | 0,079352 |
| 0,000583 | 0,079352 |
| 0,001285 | 0,079352 |
| 0,001225 | 0,079352 |
| 0,005056 | 0,079824 |
| 0,001619 | 0,079352 |
| 0,006482 | 0,079824 |
| 0,001498 | 0,079352 |
| 0,002025 | 0,079352 |
| 0,000499 | 0,079352 |
| 0,000834 | 0,079352 |
| 0,002035 | 0,079352 |
| 0,003128 | 0,079352 |
| 0,006853 | 0,081134 |
| 0,003385 | 0,079352 |
| 0,000889 | 0,079352 |
| 0,005567 | 0,079824 |
| 0,002841 | 0,079352 |
| 0,001385 | 0,079352 |
| 0,000832 | 0,079352 |
| 0,001089 | 0,079352 |
| 0,018016 | 0,093554 |
| 0,002566 | 0,079352 |
| 0,011454 | 0,085642 |
| 0,000887 | 0,079352 |
| 0,00101  | 0,079352 |
| 0,001621 | 0,079352 |
| 0,005368 | 0,079824 |
| 0,010068 | 0,083623 |
| 0,001119 | 0,079352 |
| 0,00167  | 0,079352 |
| 0,00242  | 0,079352 |

|          |          |
|----------|----------|
| 0,001044 | 0,079352 |
| 0,011588 | 0,085665 |
| 0,00226  | 0,079352 |
| 0,002357 | 0,079352 |
| 0,003366 | 0,079352 |
| 0,001814 | 0,079352 |
| 0,004396 | 0,079352 |
| 0,00166  | 0,079352 |
| 0,004553 | 0,079824 |
| 0,010678 | 0,084308 |
| 0,002496 | 0,079352 |
| 0,010837 | 0,084308 |
| 0,002762 | 0,079352 |
| 0,004117 | 0,079352 |
| 0,00534  | 0,079824 |
| 0,013673 | 0,088164 |
| 0,002041 | 0,079352 |
| 0,017125 | 0,09211  |
| 0,005177 | 0,079824 |
| 0,000664 | 0,079352 |
| 0,002931 | 0,079352 |
| 0,000771 | 0,079352 |
| 0,003206 | 0,079352 |
| 0,002992 | 0,079352 |
| 0,0022   | 0,079352 |
| 0,022762 | 0,099563 |
| 0,0041   | 0,079352 |
| 0,006456 | 0,079824 |
| 0,010243 | 0,08378  |
| 0,000583 | 0,079352 |
| 0,002055 | 0,079352 |
| 0,002495 | 0,079352 |
| 0,002898 | 0,079352 |
| 0,014149 | 0,089068 |
| 0,003947 | 0,079352 |
| 0,002198 | 0,079352 |
| 0,00356  | 0,079352 |
| 0,001581 | 0,079352 |
| 0,00095  | 0,079352 |
| 0,009088 | 0,082596 |
| 0,006007 | 0,079824 |
| 0,012602 | 0,086835 |
| 0,015915 | 0,090543 |
| 0,008875 | 0,082596 |
| 0,003678 | 0,079352 |
| 0,004874 | 0,079824 |
| 0,019077 | 0,094989 |
| 0,010684 | 0,084308 |
| 0,011587 | 0,085665 |
| 0,017692 | 0,093155 |
| 0,006849 | 0,081134 |
| 0,012429 | 0,086835 |
| 0,007052 | 0,081257 |

|          |          |
|----------|----------|
| 0,014363 | 0,089235 |
| 0,012207 | 0,086835 |
| 0,016263 | 0,090914 |
| 0,009249 | 0,082596 |
| 0,008194 | 0,082596 |
| 0,008266 | 0,082596 |
| 0,013425 | 0,087588 |
| 0,008106 | 0,082596 |
| 0,022056 | 0,098993 |
| 0,009652 | 0,082997 |
| 0,018672 | 0,094738 |
| 0,018939 | 0,094883 |
| 0,010754 | 0,084308 |
| 0,00851  | 0,082596 |
| 0,008825 | 0,082596 |
| 0,01606  | 0,090657 |
| 0,013144 | 0,08738  |
| 0,009035 | 0,082596 |
| 0,018319 | 0,094163 |
| 0,010577 | 0,084308 |
| 0,011907 | 0,08635  |
| 0,021733 | 0,098529 |
| 0,013446 | 0,087588 |
| 0,002023 | 0,079352 |
| 0,00284  | 0,079352 |
| 0,000885 | 0,079352 |
| 0,001776 | 0,079352 |
| 0,000938 | 0,079352 |
| 0,001356 | 0,079352 |
| 0,002753 | 0,079352 |
| 0,014433 | 0,089235 |
| 0,002942 | 0,079352 |
| 0,007019 | 0,081257 |
| 0,016529 | 0,091052 |
| 0,003201 | 0,079352 |
| 0,015156 | 0,089867 |
| 0,006115 | 0,079824 |
| 0,000904 | 0,079352 |
| 0,003627 | 0,079352 |
| 0,004098 | 0,079352 |
| 0,003579 | 0,079352 |
| 0,00951  | 0,082751 |
| 0,00359  | 0,079352 |
| 0,001944 | 0,079352 |
| 0,003919 | 0,079352 |
| 0,019176 | 0,095061 |
| 0,005621 | 0,079824 |
| 0,013989 | 0,088843 |
| 0,001854 | 0,079352 |
| 0,005882 | 0,079824 |
| 0,001169 | 0,079352 |
| 0,009381 | 0,082596 |
| 0,002188 | 0,079352 |

|          |          |
|----------|----------|
| 0,00682  | 0,081134 |
| 0,005217 | 0,079824 |
| 0,00158  | 0,079352 |
| 0,001669 | 0,079352 |
| 0,004593 | 0,079824 |
| 0,00554  | 0,079824 |
| 0,016293 | 0,091003 |
| 0,000774 | 0,079352 |
| 0,002943 | 0,079352 |
| 0,004981 | 0,079824 |
| 0,011653 | 0,085801 |
| 0,001772 | 0,079352 |
| 0,01067  | 0,084308 |
| 0,003552 | 0,079352 |
| 0,001786 | 0,079352 |
| 0,010594 | 0,084308 |
| 0,003361 | 0,079352 |
| 0,015178 | 0,089867 |
| 0,003224 | 0,079352 |
| 0,002776 | 0,079352 |
| 0,003623 | 0,079352 |
| 0,013044 | 0,087247 |
| 0,004705 | 0,079824 |
| 0,005996 | 0,079824 |
| 0,002699 | 0,079352 |
| 0,005731 | 0,079824 |
| 0,018553 | 0,094374 |
| 0,017635 | 0,093155 |
| 0,002201 | 0,079352 |
| 0,01902  | 0,094883 |
| 0,002591 | 0,079352 |
| 0,004013 | 0,079352 |
| 0,019014 | 0,094883 |
| 0,00522  | 0,079824 |
| 0,002271 | 0,079352 |
| 0,002587 | 0,079352 |
| 0,001971 | 0,079352 |
| 0,017362 | 0,092761 |
| 0,004889 | 0,079824 |
| 0,010752 | 0,084308 |
| 0,001022 | 0,079352 |
| 0,003553 | 0,079352 |
| 0,001899 | 0,079352 |
| 0,013824 | 0,088385 |
| 0,01062  | 0,084308 |
| 0,010262 | 0,083827 |
| 0,002034 | 0,079352 |
| 0,002163 | 0,079352 |
| 0,009258 | 0,082596 |
| 0,015046 | 0,089867 |
| 0,006394 | 0,079824 |
| 0,005551 | 0,079824 |
| 0,007809 | 0,082596 |

|          |          |
|----------|----------|
| 0,003225 | 0,079352 |
| 0,001658 | 0,079352 |
| 0,003558 | 0,079352 |
| 0,001675 | 0,079352 |
| 0,013417 | 0,087588 |
| 0,007514 | 0,081972 |
| 0,004138 | 0,079352 |
| 0,006037 | 0,079824 |
| 0,004426 | 0,079671 |
| 0,008136 | 0,082596 |
| 0,007089 | 0,081257 |
| 0,006839 | 0,081134 |
| 0,020754 | 0,096932 |
| 0,002632 | 0,079352 |
| 0,00202  | 0,079352 |
| 0,013742 | 0,088232 |
| 0,014983 | 0,089867 |
| 0,002224 | 0,079352 |
| 0,016111 | 0,090657 |
| 0,021569 | 0,098359 |
| 0,008451 | 0,082596 |
| 0,007964 | 0,082596 |
| 0,00239  | 0,079352 |
| 0,006407 | 0,079824 |
| 0,008612 | 0,082596 |
| 0,01145  | 0,085642 |
| 0,008785 | 0,082596 |
| 0,005664 | 0,079824 |
| 0,001624 | 0,079352 |
| 0,007117 | 0,081257 |
| 0,010092 | 0,083623 |
| 0,00187  | 0,079352 |
| 0,004273 | 0,079352 |
| 0,020935 | 0,096963 |
| 0,001921 | 0,079352 |
| 0,002632 | 0,079352 |
| 0,006028 | 0,079824 |
| 0,009435 | 0,082596 |
| 0,016102 | 0,090657 |
| 0,003065 | 0,079352 |
| 0,002304 | 0,079352 |
| 0,002228 | 0,079352 |
| 0,003356 | 0,079352 |
| 0,007848 | 0,082596 |
| 0,001389 | 0,079352 |
| 0,018034 | 0,093554 |
| 0,010212 | 0,083735 |
| 0,005653 | 0,079824 |
| 0,008086 | 0,082596 |
| 0,001878 | 0,079352 |
| 0,00552  | 0,079824 |
| 0,003789 | 0,079352 |
| 0,015173 | 0,089867 |

|          |          |
|----------|----------|
| 0,014547 | 0,089364 |
| 0,00623  | 0,079824 |
| 0,007784 | 0,082596 |
| 0,011042 | 0,084691 |
| 0,002072 | 0,079352 |
| 0,021545 | 0,098359 |
| 0,008725 | 0,082596 |
| 0,002988 | 0,079352 |
| 0,010791 | 0,084308 |
| 0,002656 | 0,079352 |
| 0,007043 | 0,081257 |
| 0,006297 | 0,079824 |
| 0,019    | 0,094883 |
| 0,004162 | 0,079352 |
| 0,014416 | 0,089235 |
| 0,006152 | 0,079824 |
| 0,002872 | 0,079352 |
| 0,006014 | 0,079824 |
| 0,00809  | 0,082596 |
| 0,00513  | 0,079824 |
| 0,002067 | 0,079352 |
| 0,006732 | 0,080867 |
| 0,008625 | 0,082596 |
| 0,01256  | 0,086835 |
| 0,003381 | 0,079352 |
| 0,011483 | 0,08566  |
| 0,003129 | 0,079352 |
| 0,004091 | 0,079352 |
| 0,003045 | 0,079352 |
| 0,008724 | 0,082596 |
| 0,010805 | 0,084308 |
| 0,001979 | 0,079352 |
| 0,010473 | 0,084308 |
| 0,019613 | 0,095836 |
| 0,003365 | 0,079352 |
| 0,022342 | 0,099296 |
| 0,004374 | 0,079352 |
| 0,012478 | 0,086835 |
| 0,007253 | 0,081257 |
| 0,004535 | 0,079824 |
| 0,003202 | 0,079352 |
| 0,003955 | 0,079352 |
| 0,008413 | 0,082596 |
| 0,007386 | 0,081257 |
| 0,004778 | 0,079824 |
| 0,001293 | 0,079352 |
| 0,002926 | 0,079352 |
| 0,003199 | 0,079352 |
| 0,004831 | 0,079824 |
| 0,0109   | 0,084528 |
| 0,02252  | 0,099372 |
| 0,003559 | 0,079352 |
| 0,015336 | 0,089971 |

|          |          |
|----------|----------|
| 0,001666 | 0,079352 |
| 0,008983 | 0,082596 |
| 0,003273 | 0,079352 |
| 0,002135 | 0,079352 |
| 0,007122 | 0,081257 |
| 0,002544 | 0,079352 |
| 0,003571 | 0,079352 |
| 0,022683 | 0,099389 |
| 0,006536 | 0,079824 |
| 0,007672 | 0,082596 |
| 0,014752 | 0,089364 |
| 0,014238 | 0,089103 |
| 0,005505 | 0,079824 |
| 0,017402 | 0,092761 |
| 0,003575 | 0,079352 |
| 0,01335  | 0,087588 |
| 0,002549 | 0,079352 |
| 0,005986 | 0,079824 |
| 0,002044 | 0,079352 |
| 0,002281 | 0,079352 |
| 0,015799 | 0,090543 |
| 0,003533 | 0,079352 |
| 0,001838 | 0,079352 |
| 0,00374  | 0,079352 |
| 0,008873 | 0,082596 |
| 0,005709 | 0,079824 |
| 0,003875 | 0,079352 |
| 0,020793 | 0,096932 |
| 0,00646  | 0,079824 |
| 0,005639 | 0,079824 |
| 0,004571 | 0,079824 |
| 0,003727 | 0,079352 |
| 0,002905 | 0,079352 |
| 0,003555 | 0,079352 |
| 0,00307  | 0,079352 |
| 0,006984 | 0,081257 |
| 0,003983 | 0,079352 |
| 0,019686 | 0,095836 |
| 0,004048 | 0,079352 |
| 0,001786 | 0,079352 |
| 0,005863 | 0,079824 |
| 0,007259 | 0,081257 |
| 0,012152 | 0,086788 |
| 0,008835 | 0,082596 |
| 0,010228 | 0,083761 |
| 0,008809 | 0,082596 |
| 0,002353 | 0,079352 |
| 0,01055  | 0,084308 |
| 0,004798 | 0,079824 |
| 0,009391 | 0,082596 |
| 0,006532 | 0,079824 |
| 0,01351  | 0,087588 |
| 0,020676 | 0,096932 |



|          |          |
|----------|----------|
| 0,00486  | 0,079824 |
| 0,005456 | 0,079824 |
| 0,002442 | 0,079352 |
| 0,005201 | 0,079824 |
| 0,01551  | 0,090255 |
| 0,012704 | 0,086835 |
| 0,010055 | 0,083623 |
| 0,003352 | 0,079352 |
| 0,005622 | 0,079824 |
| 0,018432 | 0,094327 |
| 0,001678 | 0,079352 |
| 0,016407 | 0,091052 |
| 0,00722  | 0,081257 |
| 0,004859 | 0,079824 |
| 0,008334 | 0,082596 |
| 0,01255  | 0,086835 |
| 0,020936 | 0,096963 |
| 0,009117 | 0,082596 |
| 0,004648 | 0,079824 |
| 0,009418 | 0,082596 |
| 0,010398 | 0,084308 |
| 0,016581 | 0,091052 |
| 0,004053 | 0,079352 |
| 0,019108 | 0,095031 |
| 0,004015 | 0,079352 |
| 0,009333 | 0,082596 |
| 0,020233 | 0,096466 |
| 0,00453  | 0,079824 |
| 0,009164 | 0,082596 |
| 0,00288  | 0,079352 |
| 0,021078 | 0,097375 |
| 0,007075 | 0,081257 |
| 0,004687 | 0,079824 |
| 0,006633 | 0,080086 |
| 0,005882 | 0,079824 |
| 0,014875 | 0,089614 |
| 0,006556 | 0,079824 |
| 0,004473 | 0,079824 |
| 0,004242 | 0,079352 |
| 0,0047   | 0,079824 |
| 0,00402  | 0,079352 |
| 0,003459 | 0,079352 |
| 0,004107 | 0,079352 |
| 0,008958 | 0,082596 |
| 0,010706 | 0,084308 |
| 0,006423 | 0,079824 |
| 0,004002 | 0,079352 |
| 0,021228 | 0,09754  |
| 0,01016  | 0,083623 |
| 0,00413  | 0,079352 |
| 0,003301 | 0,079352 |
| 0,011119 | 0,085142 |
| 0,005186 | 0,079824 |

|          |          |
|----------|----------|
| 0,008959 | 0,082596 |
| 0,007915 | 0,082596 |
| 0,003954 | 0,079352 |
| 0,010399 | 0,084308 |
| 0,004336 | 0,079352 |
| 0,006497 | 0,079824 |
| 0,005033 | 0,079824 |
| 0,017695 | 0,093155 |
| 0,009183 | 0,082596 |
| 0,005759 | 0,079824 |
| 0,003512 | 0,079352 |
| 0,002096 | 0,079352 |
| 0,010138 | 0,083623 |
| 0,005278 | 0,079824 |
| 0,006551 | 0,079824 |
| 0,012676 | 0,086835 |
| 0,019238 | 0,095169 |
| 0,008185 | 0,082596 |
| 0,007185 | 0,081257 |
| 0,002582 | 0,079352 |
| 0,008991 | 0,082596 |
| 0,01694  | 0,091716 |
| 0,003278 | 0,079352 |
| 0,017391 | 0,092761 |
| 0,002296 | 0,079352 |
| 0,005167 | 0,079824 |
| 0,010098 | 0,083623 |
| 0,013037 | 0,087247 |
| 0,012494 | 0,086835 |
| 0,014286 | 0,089169 |
| 0,00387  | 0,079352 |
| 0,012387 | 0,086835 |
| 0,00688  | 0,081161 |
| 0,0068   | 0,081134 |
| 0,01327  | 0,087588 |
| 0,018469 | 0,094368 |
| 0,006624 | 0,080086 |
| 0,013058 | 0,087254 |
| 0,004306 | 0,079352 |
| 0,006895 | 0,081188 |
| 0,005288 | 0,079824 |
| 0,009585 | 0,082853 |
| 0,019975 | 0,095974 |
| 0,006559 | 0,079824 |
| 0,003339 | 0,079352 |
| 0,007769 | 0,082596 |
| 0,015121 | 0,089867 |
| 0,002643 | 0,079352 |
| 0,011429 | 0,085642 |
| 0,003134 | 0,079352 |
| 0,00591  | 0,079824 |
| 0,005275 | 0,079824 |
| 0,018102 | 0,093554 |

|          |          |
|----------|----------|
| 0,014752 | 0,089364 |
| 0,00899  | 0,082596 |
| 0,003461 | 0,079352 |
| 0,006547 | 0,079824 |
| 0,004454 | 0,079824 |
| 0,022122 | 0,098993 |
| 0,012137 | 0,086778 |
| 0,003614 | 0,079352 |
| 0,01472  | 0,089364 |
| 0,00644  | 0,079824 |
| 0,004548 | 0,079824 |
| 0,018023 | 0,093554 |
| 0,015095 | 0,089867 |
| 0,007932 | 0,082596 |
| 0,014263 | 0,089109 |
| 0,00551  | 0,079824 |
| 0,003977 | 0,079352 |
| 0,006228 | 0,079824 |
| 0,013823 | 0,088385 |
| 0,00568  | 0,079824 |
| 0,009617 | 0,082943 |
| 0,00465  | 0,079824 |
| 0,002934 | 0,079352 |
| 0,006786 | 0,081134 |
| 0,014545 | 0,089364 |
| 0,010782 | 0,084308 |
| 0,00638  | 0,079824 |
| 0,004748 | 0,079824 |
| 0,015371 | 0,089971 |
| 0,009539 | 0,082803 |
| 0,003096 | 0,079352 |
| 0,006569 | 0,079824 |
| 0,004892 | 0,079824 |
| 0,009509 | 0,082751 |
| 0,010115 | 0,083623 |
| 0,004201 | 0,079352 |
| 0,003225 | 0,079352 |
| 0,003943 | 0,079352 |
| 0,005333 | 0,079824 |
| 0,013252 | 0,087588 |
| 0,007384 | 0,081257 |
| 0,002667 | 0,079352 |
| 0,002827 | 0,079352 |
| 0,005802 | 0,079824 |
| 0,004144 | 0,079352 |
| 0,004627 | 0,079824 |
| 0,003066 | 0,079352 |
| 0,003676 | 0,079352 |
| 0,005253 | 0,079824 |
| 0,011232 | 0,085301 |
| 0,009226 | 0,082596 |
| 0,016438 | 0,091052 |
| 0,004154 | 0,079352 |

|          |          |
|----------|----------|
| 0,003934 | 0,079352 |
| 0,01337  | 0,087588 |
| 0,00531  | 0,079824 |
| 0,010562 | 0,084308 |
| 0,019863 | 0,095936 |
| 0,00354  | 0,079352 |
| 0,018748 | 0,094757 |
| 0,010372 | 0,084308 |
| 0,004364 | 0,079352 |
| 0,003219 | 0,079352 |
| 0,020635 | 0,096932 |
| 0,009893 | 0,083623 |
| 0,003988 | 0,079352 |
| 0,011239 | 0,085301 |
| 0,005488 | 0,079824 |
| 0,005482 | 0,079824 |
| 0,005136 | 0,079824 |
| 0,008425 | 0,082596 |
| 0,010279 | 0,083862 |
| 0,01015  | 0,083623 |
| 0,010011 | 0,083623 |
| 0,006451 | 0,079824 |
| 0,007205 | 0,081257 |
| 0,007003 | 0,081257 |
| 0,00478  | 0,079824 |
| 0,006058 | 0,079824 |
| 0,012468 | 0,086835 |
| 0,010049 | 0,083623 |
| 0,004544 | 0,079824 |
| 0,003852 | 0,079352 |
| 0,007435 | 0,081524 |
| 0,012661 | 0,086835 |
| 0,003792 | 0,079352 |
| 0,008761 | 0,082596 |
| 0,011685 | 0,085801 |
| 0,008413 | 0,082596 |
| 0,005318 | 0,079824 |
| 0,010146 | 0,083623 |
| 0,005343 | 0,079824 |
| 0,005963 | 0,079824 |
| 0,006338 | 0,079824 |
| 0,00457  | 0,079824 |
| 0,004684 | 0,079824 |
| 0,006154 | 0,079824 |
| 0,022336 | 0,099296 |
| 0,017309 | 0,092761 |
| 0,005789 | 0,079824 |
| 0,013414 | 0,087588 |
| 0,008623 | 0,082596 |
| 0,009367 | 0,082596 |
| 0,015853 | 0,090543 |
| 0,005636 | 0,079824 |
| 0,011864 | 0,08635  |

|          |          |
|----------|----------|
| 0,00919  | 0,082596 |
| 0,009621 | 0,082943 |
| 0,006084 | 0,079824 |
| 0,018328 | 0,094163 |
| 0,005034 | 0,079824 |
| 0,01273  | 0,086835 |
| 0,014371 | 0,089235 |
| 0,00988  | 0,083623 |
| 0,010096 | 0,083623 |
| 0,015016 | 0,089867 |
| 0,008267 | 0,082596 |
| 0,009714 | 0,083029 |
| 0,008826 | 0,082596 |
| 0,004131 | 0,079352 |
| 0,020851 | 0,096932 |
| 0,007784 | 0,082596 |
| 0,011967 | 0,08635  |
| 0,008945 | 0,082596 |
| 0,022081 | 0,098993 |
| 0,010888 | 0,084528 |
| 0,013836 | 0,088385 |
| 0,010949 | 0,084528 |
| 0,017878 | 0,093391 |
| 0,016147 | 0,090731 |
| 0,01607  | 0,090657 |
| 0,006642 | 0,080086 |
| 0,004899 | 0,079824 |
| 0,021376 | 0,097994 |
| 0,004718 | 0,079824 |
| 0,00342  | 0,079352 |
| 0,011322 | 0,085301 |
| 0,005884 | 0,079824 |
| 0,0102   | 0,083735 |
| 0,00855  | 0,082596 |
| 0,004138 | 0,079352 |
| 0,01357  | 0,087891 |
| 0,006609 | 0,080086 |
| 0,013795 | 0,088385 |
| 0,009413 | 0,082596 |
| 0,007238 | 0,081257 |
| 0,017681 | 0,093155 |
| 0,007889 | 0,082596 |
| 0,004925 | 0,079824 |
| 0,013106 | 0,08738  |
| 0,006039 | 0,079824 |
| 0,003981 | 0,079352 |
| 0,00656  | 0,079824 |
| 0,018722 | 0,094749 |
| 0,006517 | 0,079824 |
| 0,009078 | 0,082596 |
| 0,004801 | 0,079824 |
| 0,004289 | 0,079352 |
| 0,01385  | 0,088389 |

|          |          |
|----------|----------|
| 0,003935 | 0,079352 |
| 0,008353 | 0,082596 |
| 0,011508 | 0,085665 |
| 0,01118  | 0,085161 |
| 0,015989 | 0,090657 |
| 0,018851 | 0,094839 |
| 0,009281 | 0,082596 |
| 0,008149 | 0,082596 |
| 0,006145 | 0,079824 |
| 0,012463 | 0,086835 |
| 0,018951 | 0,094883 |
| 0,005661 | 0,079824 |
| 0,008293 | 0,082596 |
| 0,011583 | 0,085665 |
| 0,014101 | 0,088999 |
| 0,009316 | 0,082596 |
| 0,01591  | 0,090543 |
| 0,004255 | 0,079352 |
| 0,005028 | 0,079824 |
| 0,012607 | 0,086835 |
| 0,007286 | 0,081257 |
| 0,009433 | 0,082596 |
| 0,007276 | 0,081257 |
| 0,019725 | 0,095836 |
| 0,006572 | 0,079824 |
| 0,016551 | 0,091052 |
| 0,008014 | 0,082596 |
| 0,012849 | 0,087105 |
| 0,00644  | 0,079824 |
| 0,004235 | 0,079352 |
| 0,007227 | 0,081257 |
| 0,014789 | 0,089364 |
| 0,02224  | 0,099273 |
| 0,005013 | 0,079824 |
| 0,004338 | 0,079352 |
| 0,010792 | 0,084308 |
| 0,017466 | 0,092871 |
| 0,011684 | 0,085801 |
| 0,005382 | 0,079824 |
| 0,004739 | 0,079824 |
| 0,016898 | 0,091667 |
| 0,004112 | 0,079352 |
| 0,009412 | 0,082596 |
| 0,020539 | 0,096932 |
| 0,017035 | 0,091928 |
| 0,00519  | 0,079824 |
| 0,009269 | 0,082596 |
| 0,006062 | 0,079824 |
| 0,020627 | 0,096932 |
| 0,012804 | 0,086983 |
| 0,013326 | 0,087588 |
| 0,007814 | 0,082596 |
| 0,014364 | 0,089235 |

|          |          |
|----------|----------|
| 0,007407 | 0,081352 |
| 0,011275 | 0,085301 |
| 0,008468 | 0,082596 |
| 0,019921 | 0,095936 |
| 0,009303 | 0,082596 |
| 0,017363 | 0,092761 |
| 0,004075 | 0,079352 |
| 0,016797 | 0,09155  |
| 0,00473  | 0,079824 |
| 0,008319 | 0,082596 |
| 0,007097 | 0,081257 |
| 0,010126 | 0,083623 |
| 0,012964 | 0,087247 |
| 0,004948 | 0,079824 |
| 0,021049 | 0,097349 |
| 0,007244 | 0,081257 |
| 0,00864  | 0,082596 |
| 0,008154 | 0,082596 |
| 0,010946 | 0,084528 |
| 0,022271 | 0,099296 |
| 0,011889 | 0,08635  |
| 0,011472 | 0,08566  |
| 0,014943 | 0,089835 |
| 0,014539 | 0,089364 |
| 0,004316 | 0,079352 |
| 0,01019  | 0,083735 |
| 0,007994 | 0,082596 |
| 0,022554 | 0,099376 |
| 0,014597 | 0,089364 |
| 0,007326 | 0,081257 |
| 0,022143 | 0,098993 |
| 0,01665  | 0,091052 |
| 0,014895 | 0,08963  |
| 0,012637 | 0,086835 |
| 0,013884 | 0,088431 |
| 0,012645 | 0,086835 |
| 0,007349 | 0,081257 |
| 0,008695 | 0,082596 |
| 0,006006 | 0,079824 |
| 0,010116 | 0,083623 |
| 0,012493 | 0,086835 |
| 0,014114 | 0,088999 |
| 0,005795 | 0,079824 |
| 0,008103 | 0,082596 |
| 0,008093 | 0,082596 |
| 0,016506 | 0,091052 |
| 0,018817 | 0,094809 |
| 0,009375 | 0,082596 |
| 0,008822 | 0,082596 |
| 0,010394 | 0,084308 |
| 0,004226 | 0,079352 |
| 0,005807 | 0,079824 |
| 0,014351 | 0,089235 |

|          |          |
|----------|----------|
| 0,019717 | 0,095836 |
| 0,022682 | 0,099389 |
| 0,006826 | 0,081134 |
| 0,022454 | 0,099372 |
| 0,006501 | 0,079824 |
| 0,016728 | 0,091327 |
| 0,005706 | 0,079824 |
| 0,017712 | 0,093155 |
| 0,022146 | 0,098993 |
| 0,012101 | 0,086752 |
| 0,007796 | 0,082596 |
| 0,007083 | 0,081257 |
| 0,015037 | 0,089867 |
| 0,008413 | 0,082596 |
| 0,007385 | 0,081257 |
| 0,010655 | 0,084308 |
| 0,010308 | 0,083991 |
| 0,010933 | 0,084528 |
| 0,004696 | 0,079824 |
| 0,020801 | 0,096932 |
| 0,009746 | 0,083039 |
| 0,012688 | 0,086835 |
| 0,021808 | 0,098714 |
| 0,020071 | 0,096261 |
| 0,019594 | 0,095836 |
| 0,011152 | 0,085161 |
| 0,016817 | 0,091582 |
| 0,009106 | 0,082596 |
| 0,012505 | 0,086835 |
| 0,005296 | 0,079824 |
| 0,018676 | 0,094738 |
| 0,009385 | 0,082596 |
| 0,014753 | 0,089364 |
| 0,005526 | 0,079824 |
| 0,009558 | 0,082803 |
| 0,006937 | 0,081257 |
| 0,016362 | 0,091052 |
| 0,006875 | 0,081161 |
| 0,009232 | 0,082596 |
| 0,014621 | 0,089364 |
| 0,009153 | 0,082596 |
| 0,007825 | 0,082596 |
| 0,005619 | 0,079824 |
| 0,020715 | 0,096932 |
| 0,014052 | 0,088981 |
| 0,021398 | 0,097994 |
| 0,012447 | 0,086835 |
| 0,006419 | 0,079824 |
| 0,010576 | 0,084308 |
| 0,006319 | 0,079824 |
| 0,018109 | 0,093554 |
| 0,015759 | 0,090543 |
| 0,006063 | 0,079824 |



|          |          |
|----------|----------|
| 0,01117  | 0,085161 |
| 0,015491 | 0,090226 |
| 0,010808 | 0,084308 |
| 0,021741 | 0,098529 |
| 0,012367 | 0,086835 |
| 0,00929  | 0,082596 |
| 0,008218 | 0,082596 |
| 0,00755  | 0,082096 |
| 0,01658  | 0,091052 |
| 0,007347 | 0,081257 |
| 0,007585 | 0,082207 |
| 0,016499 | 0,091052 |
| 0,013135 | 0,08738  |
| 0,009777 | 0,083083 |
| 0,013496 | 0,087588 |
| 0,022633 | 0,099389 |
| 0,018335 | 0,094163 |
| 0,015317 | 0,089971 |
| 0,014664 | 0,089364 |
| 0,011285 | 0,085301 |
| 0,015174 | 0,089867 |
| 0,021726 | 0,098529 |
| 0,008821 | 0,082596 |
| 0,008181 | 0,082596 |
| 0,010159 | 0,083623 |
| 0,015386 | 0,089971 |
| 0,01481  | 0,089364 |
| 0,022805 | 0,099687 |
| 0,008228 | 0,082596 |
| 0,007665 | 0,082596 |
| 0,007702 | 0,082596 |
| 0,01126  | 0,085301 |
| 0,005638 | 0,079824 |
| 0,022567 | 0,099376 |
| 0,015358 | 0,089971 |
| 0,007583 | 0,082207 |
| 0,010461 | 0,084308 |
| 0,013725 | 0,088232 |
| 0,016507 | 0,091052 |
| 0,008893 | 0,082596 |
| 0,018268 | 0,094148 |
| 0,014106 | 0,088999 |
| 0,008805 | 0,082596 |
| 0,01014  | 0,083623 |
| 0,010931 | 0,084528 |
| 0,010741 | 0,084308 |
| 0,006312 | 0,079824 |
| 0,008485 | 0,082596 |
| 0,006172 | 0,079824 |
| 0,01539  | 0,089971 |
| 0,009547 | 0,082803 |
| 0,005718 | 0,079824 |
| 0,008177 | 0,082596 |

|          |          |
|----------|----------|
| 0,011404 | 0,085642 |
| 0,022429 | 0,099372 |
| 0,011126 | 0,085142 |
| 0,005622 | 0,079824 |
| 0,012674 | 0,086835 |
| 0,009326 | 0,082596 |
| 0,015367 | 0,089971 |
| 0,013033 | 0,087247 |
| 0,011311 | 0,085301 |
| 0,020657 | 0,096932 |
| 0,008006 | 0,082596 |
| 0,013693 | 0,088164 |
| 0,012696 | 0,086835 |
| 0,016553 | 0,091052 |
| 0,015875 | 0,090543 |
| 0,018017 | 0,093554 |
| 0,008462 | 0,082596 |
| 0,009161 | 0,082596 |
| 0,016628 | 0,091052 |
| 0,010047 | 0,083623 |
| 0,015527 | 0,090277 |
| 0,009342 | 0,082596 |
| 0,007138 | 0,081257 |
| 0,010016 | 0,083623 |
| 0,015627 | 0,090543 |
| 0,022106 | 0,098993 |
| 0,015201 | 0,089897 |
| 0,019721 | 0,095836 |
| 0,010837 | 0,084308 |
| 0,009255 | 0,082596 |
| 0,008087 | 0,082596 |
| 0,008879 | 0,082596 |
| 0,012453 | 0,086835 |
| 0,00967  | 0,083029 |
| 0,013965 | 0,088772 |
| 0,007117 | 0,081257 |
| 0,008608 | 0,082596 |
| 0,014879 | 0,089614 |
| 0,017571 | 0,093126 |
| 0,012526 | 0,086835 |
| 0,015851 | 0,090543 |
| 0,012107 | 0,086752 |
| 0,013351 | 0,087588 |
| 0,016355 | 0,091052 |
| 0,015769 | 0,090543 |
| 0,010752 | 0,084308 |
| 0,009839 | 0,0835   |
| 0,006796 | 0,081134 |
| 0,020927 | 0,096963 |
| 0,011625 | 0,085801 |
| 0,016081 | 0,090657 |
| 0,009725 | 0,083029 |
| 0,016796 | 0,09155  |

|          |          |
|----------|----------|
| 0,012204 | 0,086835 |
| 0,022354 | 0,099296 |
| 0,007252 | 0,081257 |
| 0,012326 | 0,086835 |
| 0,006484 | 0,079824 |
| 0,015115 | 0,089867 |
| 0,008621 | 0,082596 |
| 0,007463 | 0,081688 |
| 0,012358 | 0,086835 |
| 0,01954  | 0,095726 |
| 0,011544 | 0,085665 |
| 0,008293 | 0,082596 |
| 0,021086 | 0,097375 |
| 0,011955 | 0,08635  |
| 0,014076 | 0,088999 |
| 0,011783 | 0,086262 |
| 0,00976  | 0,083048 |
| 0,005515 | 0,079824 |
| 0,011896 | 0,08635  |
| 0,011008 | 0,084636 |
| 0,017846 | 0,093374 |
| 0,007939 | 0,082596 |
| 0,019739 | 0,095836 |
| 0,020493 | 0,096932 |
| 0,022914 | 0,099963 |
| 0,009646 | 0,082997 |
| 0,010023 | 0,083623 |
| 0,013606 | 0,087896 |
| 0,01324  | 0,087588 |
| 0,011313 | 0,085301 |
| 0,019703 | 0,095836 |
| 0,015182 | 0,089867 |
| 0,014162 | 0,089068 |
| 0,019675 | 0,095836 |
| 0,017987 | 0,093554 |
| 0,008983 | 0,082596 |
| 0,010506 | 0,084308 |
| 0,021611 | 0,098418 |
| 0,015269 | 0,089971 |
| 0,014405 | 0,089235 |
| 0,008162 | 0,082596 |
| 0,00608  | 0,079824 |
| 0,017778 | 0,093165 |
| 0,013693 | 0,088164 |
| 0,021558 | 0,098359 |
| 0,01888  | 0,094839 |
| 0,015218 | 0,08992  |
| 0,016199 | 0,090791 |
| 0,010008 | 0,083623 |
| 0,013003 | 0,087247 |
| 0,022473 | 0,099372 |
| 0,016536 | 0,091052 |
| 0,010155 | 0,083623 |

|          |          |
|----------|----------|
| 0,013249 | 0,087588 |
| 0,01774  | 0,093155 |
| 0,014535 | 0,089364 |
| 0,00724  | 0,081257 |
| 0,009707 | 0,083029 |
| 0,017402 | 0,092761 |
| 0,014378 | 0,089235 |
| 0,006467 | 0,079824 |
| 0,013313 | 0,087588 |
| 0,022691 | 0,099389 |
| 0,018538 | 0,094374 |
| 0,019015 | 0,094883 |
| 0,008114 | 0,082596 |
| 0,020271 | 0,096554 |
| 0,011665 | 0,085801 |
| 0,011967 | 0,08635  |
| 0,021906 | 0,098714 |
| 0,017765 | 0,093165 |
| 0,016022 | 0,090657 |
| 0,017113 | 0,09211  |
| 0,014782 | 0,089364 |
| 0,010055 | 0,083623 |
| 0,015654 | 0,090543 |
| 0,01133  | 0,085301 |
| 0,009385 | 0,082596 |
| 0,009067 | 0,082596 |
| 0,013473 | 0,087588 |
| 0,019954 | 0,095974 |
| 0,011575 | 0,085665 |
| 0,015862 | 0,090543 |
| 0,01782  | 0,093311 |
| 0,01622  | 0,090832 |
| 0,010507 | 0,084308 |
| 0,019988 | 0,095974 |
| 0,013163 | 0,087419 |
| 0,011235 | 0,085301 |
| 0,01303  | 0,087247 |
| 0,01612  | 0,090657 |
| 0,016899 | 0,091667 |
| 0,015729 | 0,090543 |
| 0,014798 | 0,089364 |
| 0,020843 | 0,096932 |
| 0,017697 | 0,093155 |
| 0,008543 | 0,082596 |
| 0,010812 | 0,084308 |
| 0,011971 | 0,08635  |
| 0,010984 | 0,084543 |
| 0,021933 | 0,098714 |
| 0,011026 | 0,08467  |
| 0,008938 | 0,082596 |
| 0,012232 | 0,086835 |
| 0,015691 | 0,090543 |
| 0,010426 | 0,084308 |

|          |          |
|----------|----------|
| 0,012252 | 0,086835 |
| 0,010968 | 0,084528 |
| 0,009277 | 0,082596 |
| 0,019658 | 0,095836 |
| 0,014558 | 0,089364 |
| 0,009441 | 0,082596 |
| 0,018405 | 0,094262 |
| 0,008314 | 0,082596 |
| 0,011812 | 0,086347 |
| 0,013461 | 0,087588 |
| 0,015919 | 0,090543 |
| 0,017456 | 0,092871 |
| 0,013745 | 0,088232 |
| 0,008977 | 0,082596 |
| 0,008304 | 0,082596 |
| 0,014578 | 0,089364 |
| 0,020303 | 0,096588 |
| 0,015708 | 0,090543 |
| 0,013468 | 0,087588 |
| 0,020552 | 0,096932 |
| 0,007809 | 0,082596 |
| 0,008085 | 0,082596 |
| 0,010785 | 0,084308 |
| 0,015637 | 0,090543 |
| 0,019541 | 0,095726 |
| 0,012678 | 0,086835 |
| 0,009732 | 0,083029 |
| 0,019283 | 0,095169 |
| 0,016718 | 0,091327 |
| 0,008586 | 0,082596 |
| 0,00821  | 0,082596 |
| 0,022405 | 0,099372 |
| 0,013223 | 0,087588 |
| 0,016366 | 0,091052 |
| 0,019274 | 0,095169 |
| 0,010647 | 0,084308 |
| 0,020077 | 0,096261 |
| 0,015128 | 0,089867 |
| 0,016092 | 0,090657 |
| 0,011566 | 0,085665 |
| 0,010593 | 0,084308 |
| 0,010675 | 0,084308 |
| 0,012637 | 0,086835 |
| 0,014222 | 0,089103 |
| 0,013775 | 0,088344 |
| 0,012427 | 0,086835 |
| 0,01691  | 0,091667 |
| 0,02251  | 0,099372 |
| 0,009213 | 0,082596 |
| 0,009727 | 0,083029 |
| 0,016917 | 0,091667 |
| 0,017723 | 0,093155 |
| 0,018714 | 0,094749 |

|          |          |
|----------|----------|
| 0,010753 | 0,084308 |
| 0,019159 | 0,095061 |
| 0,011399 | 0,085642 |
| 0,021889 | 0,098714 |
| 0,022511 | 0,099372 |
| 0,011913 | 0,08635  |
| 0,015675 | 0,090543 |
| 0,013501 | 0,087588 |
| 0,017518 | 0,093049 |
| 0,011583 | 0,085665 |
| 0,016617 | 0,091052 |
| 0,009501 | 0,082751 |
| 0,016315 | 0,091048 |
| 0,01935  | 0,095294 |
| 0,012914 | 0,087247 |
| 0,0188   | 0,094796 |
| 0,020308 | 0,096588 |
| 0,014429 | 0,089235 |
| 0,013433 | 0,087588 |
| 0,021157 | 0,097492 |
| 0,02079  | 0,096932 |
| 0,020217 | 0,096466 |
| 0,019085 | 0,094989 |
| 0,013387 | 0,087588 |
| 0,015734 | 0,090543 |
| 0,018189 | 0,093817 |
| 0,009566 | 0,082803 |
| 0,008022 | 0,082596 |
| 0,016597 | 0,091052 |
| 0,012472 | 0,086835 |
| 0,012066 | 0,086742 |
| 0,017627 | 0,093155 |
| 0,016001 | 0,090657 |
| 0,012571 | 0,086835 |
| 0,022551 | 0,099376 |
| 0,017386 | 0,092761 |
| 0,018797 | 0,094796 |
| 0,012763 | 0,086835 |
| 0,011992 | 0,08635  |
| 0,020616 | 0,096932 |
| 0,021831 | 0,098714 |
| 0,015409 | 0,089971 |
| 0,020367 | 0,096798 |
| 0,022359 | 0,099296 |
| 0,022626 | 0,099389 |
| 0,011964 | 0,08635  |
| 0,020888 | 0,096963 |
| 0,018129 | 0,09358  |
| 0,015785 | 0,090543 |
| 0,017029 | 0,091928 |
| 0,015979 | 0,090657 |
| 0,01767  | 0,093155 |
| 0,01542  | 0,089971 |

|          |          |
|----------|----------|
| 0,010548 | 0,084308 |
| 0,020639 | 0,096932 |
| 0,014639 | 0,089364 |
| 0,011655 | 0,085801 |
| 0,015356 | 0,089971 |
| 0,018539 | 0,094374 |
| 0,011181 | 0,085161 |
| 0,018527 | 0,094374 |
| 0,010969 | 0,084528 |
| 0,008769 | 0,082596 |
| 0,012968 | 0,087247 |
| 0,009006 | 0,082596 |
| 0,0156   | 0,090543 |
| 0,019131 | 0,095061 |
| 0,013119 | 0,08738  |
| 0,016983 | 0,091797 |
| 0,011788 | 0,086262 |
| 0,013608 | 0,087896 |
| 0,014473 | 0,089311 |
| 0,011779 | 0,086262 |
| 0,022758 | 0,099563 |
| 0,013035 | 0,087247 |
| 0,017747 | 0,093155 |
| 0,021202 | 0,09754  |
| 0,021697 | 0,098529 |
| 0,014015 | 0,088918 |
| 0,013043 | 0,087247 |
| 0,012527 | 0,086835 |
| 0,014453 | 0,089271 |
| 0,013127 | 0,08738  |
| 0,021161 | 0,097492 |
| 0,016235 | 0,090835 |
| 0,019856 | 0,095936 |
| 0,01479  | 0,089364 |
| 0,017639 | 0,093155 |
| 0,022669 | 0,099389 |
| 0,017542 | 0,093049 |
| 0,014248 | 0,089103 |
| 0,012765 | 0,086835 |
| 0,020231 | 0,096466 |
| 0,022303 | 0,099296 |
| 0,012598 | 0,086835 |
| 0,022671 | 0,099389 |
| 0,020413 | 0,096876 |
| 0,016403 | 0,091052 |
| 0,020579 | 0,096932 |
| 0,019642 | 0,095836 |
| 0,013933 | 0,088658 |
| 0,015039 | 0,089867 |
| 0,018881 | 0,094839 |
| 0,016469 | 0,091052 |
| 0,019763 | 0,095881 |
| 0,013883 | 0,088431 |

|          |          |
|----------|----------|
| 0,013427 | 0,087588 |
| 0,022366 | 0,099296 |
| 0,02078  | 0,096932 |
| 0,020782 | 0,096932 |
| 0,014178 | 0,089068 |
| 0,017352 | 0,092761 |
| 0,014188 | 0,089068 |
| 0,022834 | 0,099745 |
| 0,01714  | 0,092115 |
| 0,015456 | 0,090105 |
| 0,01809  | 0,093554 |
| 0,014035 | 0,088961 |
| 0,012649 | 0,086835 |
| 0,01894  | 0,094883 |
| 0,020932 | 0,096963 |
| 0,022136 | 0,098993 |
| 0,015815 | 0,090543 |
| 0,018732 | 0,094749 |
| 0,012883 | 0,087246 |
| 0,021497 | 0,098358 |
| 0,017458 | 0,092871 |
| 0,020663 | 0,096932 |
| 0,01501  | 0,089867 |
| 0,020855 | 0,096932 |
| 0,019044 | 0,094929 |
| 0,021239 | 0,09754  |
| 0,015949 | 0,090631 |
| 0,019397 | 0,09545  |
| 0,020726 | 0,096932 |
| 0,020984 | 0,097117 |
| 0,020153 | 0,096466 |
| 0,015047 | 0,089867 |
| 0,022194 | 0,099139 |
| 0,019256 | 0,095169 |
| 0,019823 | 0,095936 |
| 0,019477 | 0,095722 |
| 0,018092 | 0,093554 |
| 0,012821 | 0,087007 |
| 0,021099 | 0,097375 |
| 0,016614 | 0,091052 |
| 0,019539 | 0,095726 |
| 0,017871 | 0,093391 |
| 0,015409 | 0,089971 |
| 0,016172 | 0,090744 |
| 0,012608 | 0,086835 |
| 0,018495 | 0,094374 |
| 0,019481 | 0,095722 |
| 0,021277 | 0,097644 |
| 0,011891 | 0,08635  |
| 0,014752 | 0,089364 |
| 0,016643 | 0,091052 |
| 0,018028 | 0,093554 |
| 0,017098 | 0,09211  |



|          |          |
|----------|----------|
| 0,020742 | 0,096932 |
| 0,019973 | 0,095974 |
| 0,016177 | 0,090744 |
| 0,013257 | 0,087588 |
| 0,01423  | 0,089103 |
| 0,014644 | 0,089364 |
| 0,021952 | 0,09873  |
| 0,019894 | 0,095936 |
| 0,018557 | 0,094374 |
| 0,015365 | 0,089971 |
| 0,015727 | 0,090543 |
| 0,022678 | 0,099389 |
| 0,016892 | 0,091667 |
| 0,020233 | 0,096466 |
| 0,019863 | 0,095936 |
| 0,020146 | 0,096466 |
| 0,021523 | 0,098358 |
| 0,018858 | 0,094839 |
| 0,020574 | 0,096932 |
| 0,020853 | 0,096932 |
| 0,019885 | 0,095936 |
| 0,019819 | 0,095936 |
| 0,021925 | 0,098714 |
| 0,020238 | 0,096466 |
| 0,015685 | 0,090543 |
| 0,021908 | 0,098714 |
| 0,020238 | 0,096466 |
| 0,021714 | 0,098529 |
| 0,016598 | 0,091052 |
| 0,02199  | 0,098784 |
| 0,018903 | 0,094879 |
| 0,016604 | 0,091052 |
| 0,021692 | 0,098529 |
| 0,019187 | 0,095061 |
| 0,018361 | 0,094163 |
| 0,018621 | 0,094625 |
| 0,014661 | 0,089364 |
| 0,018372 | 0,094163 |
| 0,014419 | 0,089235 |
| 0,017533 | 0,093049 |
| 0,019711 | 0,095836 |
| 0,018457 | 0,094368 |
| 0,021513 | 0,098358 |
| 0,018086 | 0,093554 |
| 0,022867 | 0,099822 |
| 0,018071 | 0,093554 |
| 0,021583 | 0,098359 |
| 0,019157 | 0,095061 |
| 0,017073 | 0,092058 |
| 0,021395 | 0,097994 |
| 0,019311 | 0,095169 |
| 0,021869 | 0,098714 |
| 0,016916 | 0,091667 |

|          |          |
|----------|----------|
| 0,019017 | 0,094883 |
| 0,019303 | 0,095169 |
| 0,021821 | 0,098714 |
| 0,019284 | 0,095169 |
| 0,017381 | 0,092761 |
| 0,022418 | 0,099372 |
| 0,0195   | 0,095726 |
| 0,019909 | 0,095936 |
| 0,022321 | 0,099296 |
| 0,021928 | 0,098714 |
| 0,018371 | 0,094163 |
| 0,019801 | 0,095936 |
| 0,022515 | 0,099372 |
| 0,021225 | 0,09754  |
| 0,021169 | 0,097492 |
