# Supplementary material for: Female Drosophila melanogaster Gene Expression and Mate Choice: The X Chromosome Harbours Candidate Genes Underlying Sexual Isolation
Source: PubMed Central journal article supplement (PMC3046225; doi:10.1371/journal.pone.0017358), 2011-02-28
Supplement: pone.0017358.s003.pdf [file pone.0017358.s003.pdf]

**Table S2. Tissue-level enrichment analysis. Tissues with an overrepresentation of differentially expressed genes with at least 200% the expression level in whole flies ( $P < 0.05$ ) are highlighted in bold.**

| <b>Tissue</b>               | <b>P value</b>  | <b>Odds ratio</b> | <b>Expected count</b> | <b>Count</b> | <b>Total genes</b> |
|-----------------------------|-----------------|-------------------|-----------------------|--------------|--------------------|
| <b>Brain</b>                | <b>0.015</b>    | <b>1.164</b>      | <b>284.47</b>         | <b>331</b>   | <b>1241</b>        |
| Head                        | 1               | 0.382             | 264.76                | 101          | 1155               |
| Eye                         | 1               | 0.662             | 244.59                | 162          | 1067               |
| Thoracic abdominal ganglion | 0.277           | 1.046             | 273.47                | 286          | 1193               |
| Salivary gland              | 0.999           | 0.773             | 312.9                 | 242          | 1365               |
| Crop                        | 0.999           | 0.8               | 232.21                | 181          | 1013               |
| Midgut                      | 1               | 0.541             | 240.46                | 130          | 1049               |
| Tubule                      | 1               | 0.687             | 218.45                | 150          | 953                |
| Hindgut                     | 1               | 0.547             | 217.54                | 119          | 949                |
| heart                       | 1               | 0.529             | 215.47                | 114          | 940                |
| Fat body                    | 1               | 0.631             | 237.71                | 150          | 1037               |
| <b>Ovary</b>                | <b>2.20E-16</b> | <b>2.134</b>      | <b>300.29</b>         | <b>641</b>   | <b>1310</b>        |
| Virgin spermatheca          | 1               | 0.645             | 226.25                | 146          | 987                |
| Mated spermatheca           | 1               | 0.639             | 233.12                | 149          | 1017               |
| Carcass                     | 1               | 0.316             | 275.53                | 87           | 1202               |
