# Supplementary material for: Female Drosophila melanogaster Gene Expression and Mate Choice: The X Chromosome Harbours Candidate Genes Underlying Sexual Isolation
Source: PubMed Central journal article supplement (PMC3046225; doi:10.1371/journal.pone.0017358), 2011-02-28
Supplement: pone.0017358.s004.pdf [file pone.0017358.s004.pdf]

**Table S3. Results of non-random chromosomal distribution analysis, including all significant cytobands, sub-bands and sub-sub bands (p < 0.05).**

| <b>Chromosome Map ID</b> | <b>P value</b> | <b>Odds Ratio</b> | <b>Expected Count</b> | <b>Count</b> | <b>Size</b> |
|--------------------------|----------------|-------------------|-----------------------|--------------|-------------|
| X                        | 2.24E-08       | 1.475             | 241.371               | 317          | 2079        |
| 47C                      | 5.64E-04       | 4.503             | 3.135                 | 10           | 27          |
| 72C                      | 7.74E-04       | 6.689             | 1.741                 | 7            | 15          |
| 31E2                     | 8.21E-04       | 30.536            | 0.58                  | 4            | 5           |
| 38D2                     | 8.67E-04       | 12.73             | 0.929                 | 5            | 8           |
| 79D                      | 8.67E-04       | 12.73             | 0.929                 | 5            | 8           |
| 61C                      | 1.11E-03       | 3.404             | 4.528                 | 12           | 39          |
| 79D3                     | 1.56E-03       | Inf               | 0.348                 | 3            | 3           |
| 96B20                    | 2.24E-03       | 15.266            | 0.697                 | 4            | 6           |
| 61                       | 2.84E-03       | 1.939             | 15.557                | 27           | 134         |
| 61C8                     | 3.18E-03       | 5.73              | 1.625                 | 6            | 14          |
| 1                        | 4.40E-03       | 1.983             | 13.003                | 23           | 112         |
| 47C5                     | 4.74E-03       | 10.177            | 0.813                 | 4            | 7           |
| 96B19                    | 4.74E-03       | 10.177            | 0.813                 | 4            | 7           |
| 98E5                     | 4.74E-03       | 10.177            | 0.813                 | 4            | 7           |
| 1F                       | 5.30E-03       | 6.363             | 1.277                 | 5            | 11          |
| 93B                      | 5.69E-03       | 3.597             | 2.902                 | 8            | 25          |
| 1B13                     | 5.71E-03       | 22.886            | 0.464                 | 3            | 4           |
| 24C8                     | 5.71E-03       | 22.886            | 0.464                 | 3            | 4           |
| 33B11                    | 5.71E-03       | 22.886            | 0.464                 | 3            | 4           |
| 54E9                     | 5.71E-03       | 22.886            | 0.464                 | 3            | 4           |

|      |          |        |       |    |    |
|------|----------|--------|-------|----|----|
|      | 03       |        |       |    |    |
| 57F4 | 5.71E-03 | 22.886 | 0.464 | 3  | 4  |
| 38D  | 6.92E-03 | 4.583  | 1.858 | 6  | 16 |
| 61B  | 6.99E-03 | 3.128  | 3.599 | 9  | 31 |
| 13F  | 7.47E-03 | 3.82   | 2.438 | 7  | 21 |
| 47C1 | 8.22E-03 | 5.454  | 1.393 | 5  | 12 |
| 72C1 | 8.22E-03 | 5.454  | 1.393 | 5  | 12 |
| 22D1 | 8.61E-03 | 7.632  | 0.929 | 4  | 8  |
| 27C4 | 8.61E-03 | 7.632  | 0.929 | 4  | 8  |
| 2B   | 1.04E-02 | 2.416  | 5.805 | 12 | 50 |
| 1F4  | 1.30E-02 | 11.442 | 0.58  | 3  | 5  |
| 64D5 | 1.30E-02 | 11.442 | 0.58  | 3  | 5  |
| 66B7 | 1.30E-02 | 11.442 | 0.58  | 3  | 5  |
| 79A4 | 1.30E-02 | 11.442 | 0.58  | 3  | 5  |
| 10C6 | 1.35E-02 | Inf    | 0.232 | 2  | 2  |
| 10E6 | 1.35E-02 | Inf    | 0.232 | 2  | 2  |
| 12C1 | 1.35E-02 | Inf    | 0.232 | 2  | 2  |
| 45A7 | 1.35E-02 | Inf    | 0.232 | 2  | 2  |
| 48F8 | 1.35E-02 | Inf    | 0.232 | 2  | 2  |
| 4B3  | 1.35E-02 | Inf    | 0.232 | 2  | 2  |
| 51E2 | 1.35E-02 | Inf    | 0.232 | 2  | 2  |
| 56C1 | 1.35E-02 | Inf    | 0.232 | 2  | 2  |
| 70E5 | 1.35E-02 | Inf    | 0.232 | 2  | 2  |
| 72C2 | 1.35E-02 | Inf    | 0.232 | 2  | 2  |

|       |          |       |        |    |     |
|-------|----------|-------|--------|----|-----|
|       | 02       |       |        |    |     |
| 87D11 | 1.35E-02 | Inf   | 0.232  | 2  | 2   |
| 8F2   | 1.35E-02 | Inf   | 0.232  | 2  | 2   |
| 92B9  | 1.35E-02 | Inf   | 0.232  | 2  | 2   |
| 95F12 | 1.35E-02 | Inf   | 0.232  | 2  | 2   |
| 56F16 | 1.41E-02 | 6.105 | 1.045  | 4  | 9   |
| 7     | 1.70E-02 | 1.681 | 16.138 | 25 | 139 |
| 28E   | 1.71E-02 | 4.241 | 1.625  | 5  | 14  |
| 29C   | 1.73E-02 | 3.524 | 2.206  | 6  | 19  |
| 72    | 1.79E-02 | 1.738 | 13.816 | 22 | 119 |
| 2     | 1.82E-02 | 1.711 | 14.629 | 23 | 126 |
| 14    | 2.11E-02 | 1.859 | 10.101 | 17 | 87  |
| 5E    | 2.23E-02 | 3.272 | 2.322  | 6  | 20  |
| 7E    | 2.23E-02 | 3.272 | 2.322  | 6  | 20  |
| 61C1  | 2.32E-02 | 3.816 | 1.741  | 5  | 15  |
| 18D13 | 2.38E-02 | 7.627 | 0.697  | 3  | 6   |
| 38A2  | 2.38E-02 | 7.627 | 0.697  | 3  | 6   |
| 48E2  | 2.38E-02 | 7.627 | 0.697  | 3  | 6   |
| 52A6  | 2.38E-02 | 7.627 | 0.697  | 3  | 6   |
| 70C5  | 2.38E-02 | 7.627 | 0.697  | 3  | 6   |
| 72D9  | 2.38E-02 | 7.627 | 0.697  | 3  | 6   |
| 88A3  | 2.38E-02 | 7.627 | 0.697  | 3  | 6   |
| 92E2  | 2.38E-02 | 7.627 | 0.697  | 3  | 6   |
| 94E   | 2.53E-   | 2.814 | 3.019  | 7  | 26  |

|       |          |        |        |    |     |
|-------|----------|--------|--------|----|-----|
|       | 02       |        |        |    |     |
| 7F    | 2.83E-02 | 3.054  | 2.438  | 6  | 21  |
| 35D4  | 3.05E-02 | 4.36   | 1.277  | 4  | 11  |
| 61B2  | 3.06E-02 | 3.469  | 1.858  | 5  | 16  |
| 18D   | 3.08E-02 | 2.673  | 3.135  | 7  | 27  |
| 96B   | 3.39E-02 | 2.051  | 6.037  | 11 | 52  |
| 30B   | 3.52E-02 | 2.863  | 2.554  | 6  | 22  |
| 31E   | 3.52E-02 | 2.863  | 2.554  | 6  | 22  |
| 10    | 3.53E-02 | 1.624  | 13.932 | 21 | 120 |
| 18D11 | 3.73E-02 | 15.246 | 0.348  | 2  | 3   |
| 1F3   | 3.73E-02 | 15.246 | 0.348  | 2  | 3   |
| 23C3  | 3.73E-02 | 15.246 | 0.348  | 2  | 3   |
| 26B5  | 3.73E-02 | 15.246 | 0.348  | 2  | 3   |
| 28E1  | 3.73E-02 | 15.246 | 0.348  | 2  | 3   |
| 29C5  | 3.73E-02 | 15.246 | 0.348  | 2  | 3   |
| 29E4  | 3.73E-02 | 15.246 | 0.348  | 2  | 3   |
| 33B9  | 3.73E-02 | 15.246 | 0.348  | 2  | 3   |
| 37B10 | 3.73E-02 | 15.246 | 0.348  | 2  | 3   |
| 43E3  | 3.73E-02 | 15.246 | 0.348  | 2  | 3   |
| 57C2  | 3.73E-02 | 15.246 | 0.348  | 2  | 3   |
| 58D8  | 3.73E-02 | 15.246 | 0.348  | 2  | 3   |
| 5E4   | 3.73E-02 | 15.246 | 0.348  | 2  | 3   |
| 60B10 | 3.73E-02 | 15.246 | 0.348  | 2  | 3   |
| 72B   | 3.73E-02 | 15.246 | 0.348  | 2  | 3   |

|       |          |        |        |    |     |
|-------|----------|--------|--------|----|-----|
|       | 02       |        |        |    |     |
| 76C5  | 3.73E-02 | 15.246 | 0.348  | 2  | 3   |
| 7A    | 3.73E-02 | 15.246 | 0.348  | 2  | 3   |
| 93B13 | 3.73E-02 | 15.246 | 0.348  | 2  | 3   |
| 94E13 | 3.73E-02 | 15.246 | 0.348  | 2  | 3   |
| 96F6  | 3.73E-02 | 15.246 | 0.348  | 2  | 3   |
| 16F6  | 3.81E-02 | 5.72   | 0.813  | 3  | 7   |
| 67B5  | 3.81E-02 | 5.72   | 0.813  | 3  | 7   |
| 16B   | 3.93E-02 | 3.18   | 1.974  | 5  | 17  |
| 33B   | 4.31E-02 | 2.694  | 2.67   | 6  | 23  |
| 56F   | 4.37E-02 | 2.263  | 4.063  | 8  | 35  |
| 18    | 4.54E-02 | 1.639  | 11.842 | 18 | 102 |
| 18C   | 4.94E-02 | 2.935  | 2.09   | 5  | 18  |

---
